# Supplementary material for: Marine Biodiversity in the Caribbean: Regional Estimates and Distribution Patterns
Source: PLoS One. 2010 Aug 2;5(8):e11916. doi: 10.1371/journal.pone.0011916 (PMC2914069; doi:10.1371/journal.pone.0011916)
Supplement: Table S1 — Diversity, state of knowledge, and expertise of all taxonomic groups within the Caribbean region. Sources of the reports: databases, scientific literature, books, field guides, technical reports. State of knowledge classified as: 5 = very well known (>80% described, identification guides <20 years old, and current taxonomic expertise); 4 = well known (>70% described, identification guides <50 years old, some taxonomic expertise); 3 = poorly known (<50% species described, identification guides old or incomplete, no present expertise within region); 2 = very poorly known (only few species recorded, no identification guides, no expertise); 1 = unknown (no species recorded, no identification guides, no expertise). Taxonomic experts were defined as people with expertise in the description and identification of particular groups of marine species (i.e., taxa). (0.03 MB XLS) [file pone.0011916.s001.xls]

## Sheet: Caribbean marine biodiversity
Table S1. Caribbean marine biodiversity detailed by taxonomic group
Kingdom	Phylum or Class	Class or Order	Order or Family	Described species	State of Knowledge	Number endemic species	Number introduced species	Number taxonomic experts	Number identification guides
Animalia	Chordata	Mammalia		27	5	1	0	>50	1
		Aves		26	4	ND	0	>100	5
		Pisces	Elasmobranchii	85	5	9	0	5	8
			Actinopterygii	1251	4	695	15	50	8
		Reptilia	Testudines	6	5	0	0	>20	4
		Urochordata	Ascidiacea	62	3	ND	1	ND	1
			Thaliacea	1	4	0	0	ND	2
		Cephalochordata		1	3	0	0	ND	0
	Echinodermata	Crinoidea		30	3	ND	ND	5	2
		Asteroidea		115	4	ND	ND		2
		Ophiuroidea		153	3	ND	ND		2
		Echinoidea		77	4	ND	ND		2
		Holothuroidea		63	4	ND	ND		2
	Chelicerata	Pycnogonida		115	4	ND	ND	3	3
	Crustacea	Copepoda		498	3	46	ND	ND	1
		Ostracoda		56	2	ND	ND	2	0
		Stomatopoda		59	3	ND	ND	6	2
		Amphipoda		398	4	5	3	3	10
		Cumacea		129	3	ND	ND	9	1
		Isopoda		512	4	10	1	13	2
		Mysida		64	3	8	ND	6	3
		Tanaidacea		28	2	1	ND	10	1
		Euphasiacea		29	2	ND	ND	1	0
		Decapoda		1120	4	ND	3	7	3
		Branchiopoda		1	2	ND	ND	ND	0
		Remipedia		19	1	ND	ND	4	0
		Leptostraca		3	1	ND	ND	ND	0
	Tardigrada			5	2	4	ND	1	0
	Nematoda			81	2	ND	ND	ND	0
	Nematomorpha			0	1	0	0	ND	0
	Kinorhyncha			15	1	ND	ND	ND	0
	Loricifera			0	1	0	ND	ND	0
	Priapulida			2	1	1	ND	ND	0
	Platyhelminthes			129
	Gastrotricha			18	2	ND	ND	1	0
	Rotifera			20	1	ND	ND	1	0
	Micrognathozoa			0	1	0	ND	ND	0
	Cycliophora			0	1	0	ND	ND	0
	Mollusca	Aplacophora		0	1	0	ND	0	0
		Polyplacophora		48	4	9	0	3	6
		Monoplacophora		0	1	0	0	0	0
		Gastropoda		2301	4	675	4	8	8
		Cephalopoda		74	4	8	0	2	2
		Bivalvia		543	4	97	4	6	5
		Scaphopoda		66	3	4	0	2	2
	Annelida	Polychaeta		658	3	ND	2	31	1
		Pogonophora		13	2	ND	ND	ND	0
	Sipuncula			45	3	ND	ND	3	0
	Gnathostomulida			29	1	ND	ND	ND	0
	Chaetognatha			25	2	ND	ND	3	0
	Mesozoa			3	1	ND	ND	ND	0
	Nemertea			4	1	ND	ND	ND	0
	Phoronida			3	1	ND	ND	ND	0
	Brachiopoda			5	2	ND	ND	ND	0
	Entoprocta			3	1	ND	ND	ND	0
	Bryozoa			131	2	ND	ND	2	0
	Cnidaria	Anthozoa	Actinaria	105	2	ND	ND	1	1
			Antiphataria	37	2	ND	0	3	1
			Ceriantharia	2	1	ND	0	ND	ND
			Coralliomorpha	119	2	ND	0	ND	0
			Zooanthidea	33	2	ND	ND	1	1
			Scleractinia	287	3	ND	0	5	8
		Octocorallia		112	3	ND	1	4	1
		Cubozoa		2	1	ND	ND	ND	0
		Hydrozoa		210	3	ND	1	1	0
		Siphonophora		70	3	ND	ND	5	1
		Scyphozoa		17	2	ND	2	1	0
	Ctenophora			6	2	ND	ND	ND	0
	Myxozoa			1	1	ND	ND	ND	0
	Porifera			519	4	ND	1	3	4
	Placozoa			7	2	ND	ND	ND	0
Plantae	Algae	Chlorophyta		170	4	ND	1	10	1
		Rhodophyta		320	3	ND	ND	10	1
Chromista	Algae	Phaeophyta		71	4	ND	ND	10	1
	Angiospermae	(seagrasses)		6	5	ND	0	5	2
	Angiospermae	(mangroves)		8	5	ND	1	8	1
Protoctista / Protista	Foraminifera			704	2	ND	ND	ND	1
	Dinoflagellata			31	1	ND	ND	ND	ND
	Amoebozoa			17	1	ND	ND	ND	ND
Fungi				38	1	ND	ND	ND	ND
Bacteria	Cyanobacteria			5	1	ND	ND	ND	ND
			Total	12046
