# Supplementary material for: Marine Biodiversity in the Caribbean: Regional Estimates and Distribution Patterns
Source: PLoS One. 2010 Aug 2;5(8):e11916. doi: 10.1371/journal.pone.0011916 (PMC2914069; doi:10.1371/journal.pone.0011916)
Supplement: Table S3 — List of sponge (Porifera) species of the Caribbean and countries by ecoregion where the species have been reported. Data compiled by Cristina Díaz. (0.12 MB XLS) [file pone.0011916.s003.xls]

## Sheet: Sheet1
Table S3. List of sponge (Porifera) species of the Caribbean and countries by ecoregion where the species have been reported. Data compiled by Cristina Díaz
	Greater Antilles						Western Caribbean			Southwestern Caribbean				Southern Caribbean				Eastern Caribbean
SPECIES	CUBA	PUERTO RICO	HISPANIOLA	JAMAICA	CAYMAN ISLANDS		MEXICO	BELIZE		COSTA RICA	PANAMA	COLOMBIA		VENEZUELA	BONAIRE	CURAZAO		BARBADOS	VIRGIN ISLANDS
Aaptos_pernucleata	0	0	0	0	0		0	0		0	0	0		0	0	0		0	0
Aaptos_aaptos	1	0	0	0	0		1	0		0	0	0		1	1	0		1	0
Aaptos_bergmani	0	0	0	0	0		0	0		0	0	1		0	0	0		0	0
Aaptos_duchassaingi	0	0	0	0	0		1	1		0	0	0		0	0	0		0	0
Acanthancora_coralliophila	0	0	0	0	0		0	0		0	0	0		0	1	1		0	0
Acanthella_cubensis	0	0	0	0	0		0	0		0	0	1		1	1	0		0	0
Acanthella_flagelliformis	0	0	0	0	0		0	0		0	0	0		0	0	0		1	0
Acanthella_mastophora	1	0	0	0	0		0	0		0	0	0		0	0	0		0	0
Acanthella_vaceleti	0	0	0	0	0		0	0		0	0	0		0	0	0		1	0
Acanthotetilla_gorgonosclera	0	0	0	0	0		0	0		0	0	0		0	0	1		1	0
Acarnus_deweerdtae	1	0	0	0	0		0	0		0	0	0		0	1	1		0	0
Acarnus_innominatus	1	0	0	0	0		0	0		0	0	1		0	0	1		0	0
Acarnus_nicoleae	1	0	0	1	0		1	1		0	1	1		0	1	1		0	0
Acarnus_souriei_nicoleae	0	1	0	0	0		0	0		0	0	0		0	0	1		1	0
Aciculites_cribrophora	1	0	0	0	0		0	0		0	0	0		0	0	0		1	0
Aciculites_higginsi	1	0	0	0	0		0	0		0	0	0		0	0	0		0	0
Adreus_stylifer	0	0	0	0	0		0	0		0	0	1		0	0	1		0	0
Agelas_cerebrum	0	0	0	0	1		0	1		0	0	0		0	0	0		0	0
Agelas_cervicornis	0	0	0	0	0		0	0		0	0	0		0	0	0		0	0
Agelas_citrina	1	0	0	0	1		0	1		0	0	0		1	0	0		0	0
Agelas_clathrodes	1	0	1	1	1		1	1		1	1	1		1	1	0		1	0
Agelas_conifera	1	0	1	1	1		1	1		0	1	1		1	1	0		0	0
Agelas_dilatata	1	0	0	0	1		0	1		0	0	0		1	0	0		0	0
Agelas_dispar	1	0	1	1	0		1	1		0	1	1		0	1	0		0	0
Agelas_marmarica	0	0	0	0	0		0	0		0	0	1		0	0	0		0	0
Agelas_repens	0	0	0	1	1		0	1		0	0	0		0	0	0		0	0
Agelas_sceptrum	1	0	0	1	1		1	1		0	0	1		1	1	0		1	0
Agelas_schmidti	1	0	1	1	0		1	1		0	0	1		1	0	0		1	0
Agelas_sventres	0	0	0	1	1		0	1		0	0	0		1	0	0		0	0
Agelas_tubulata	1	0	0	1	1		0	1		0	0	0		1	0	0		0	0
Agelas_wiedenmayeri	1	0	1	1	1		0	1		0	0	1		1	0	0		0	0
Aiolochroia_crassa	1	1	1	1	1		1	1		1	1	1		1	1	1		0	0
Aka_brevitubulata	1	0	0	1	0		0	0		1	0	1		0	0	0		0	0
Aka_cf_brevitubulata	0	0	0	1	1		0	1		0	0	0		0	0	0		0	0
Aka_coralliphaga	1	0	1	1	1		1	1		1	1	1		1	1	0		0	1
Aka_siphona	1	0	0	1	0		0	1		0	0	0		0	0	0		0	0
Aka_sp	0	0	0	0	0		0	1		0	0	0		0	0	0		0	0
Aka_xamaycaensis	1	0	0	1	1		0	0		0	0	0		0	0	0		0	0
Aka/Metschnikowia_sp	0	0	0	1	0		0	0		0	0	0		0	1	0		0	0
Alectona_jamaicensis	0	0	0	1	0		0	1		0	0	0		0	0	0		0	0
Amorphinopsis_atlantica	0	0	0	0	0		0	1		1	1	1		1	0	0		0	0
Amorphinopsis_sp_2	0	0	0	0	0		0	1		0	0	0		0	0	0		0	0
Amphibleptula_madrepora	1	0	0	0	0		0	0		0	0	0		0	0	0		1	0
Amphimedon_aff_erina	0	0	0	0	0		0	1		0	0	0		0	0	0		0	0
Amphimedon_caribica	1	1	0	1	0		0	0		0	1	0		0	0	0		0	0
Amphimedon_complanata	1	0	0	1	0		0	0		0	0	0		0	0	0		0	1
Amphimedon_compressa	1	1	1	1	1		1	1		0	0	1		1	0	0		0	1
Amphimedon_erina	0	0	1	0	0		0	1		0	1	1		1	0	0		1	0
Amphimedon_spiculosa	0	1	0	0	0		0	0		0	0	0		0	0	0		0	0
Amphimedon_viridis	1	1	0	0	0		1	1		1	1	1		1	0	1		0	1
Ancorina_alba	1	0	0	0	0		0	0		0	0	0		0	0	0		0	0
Antho_barbadensis	0	0	0	0	0		0	0		0	0	0		0	0	0		1	0
Aplysilla_glacialis	0	0	1	0	0		0	1		0	1	1		1	0	0		0	0
Aplysilla_sp_1	0	0	0	0	0		0	1		0	0	0		0	0	0		0	0
Aplysilla_sp_2	0	0	0	0	0		0	1		0	0	0		0	0	0		0	0
Aplysilla_sp_3	0	0	0	0	0		0	1		0	0	0		0	0	0		0	0
Aplysilla_sp_aff_sulfurea	0	0	0	0	0		0	0		0	0	0		1	1	0		0	0
Aplysina_archeri	1	0	1	1	0		1	1		0	1	1		1	1	1		0	0
Aplysina_bathyphila	0	0	0	1	1		0	0		0	0	0		0	0	0		0	0
Aplysina_cauliformis	1	0	1	1	1		1	1		1	1	1		1	1	0		0	0
Aplysina_fistularis	1	1	1	1	1		1	1		1	1	0		1	1	0		0	1
Aplysina_fulva	1	0	1	1	1		1	1		1	1	1		1	1	0		0	0
Aplysina_insularis	0	0	0	0	0		1	1		1	1	1		1	0	0		0	1
Aplysina_lacunosa	1	0	1	0	0		1	0		1	0	1		0	0	1		0	1
Aplysina_ocracea	1	0	0	0	0		0	0		0	0	0		0	0	0		0	0
Artemisina_melana	1	0	1	1	1		0	1		0	1	1		1	1	1		0	0
Asteropus_brasiliensis	1	0	0	0	0		0	0		0	0	0		0	0	0		0	0
Asteropus_syringifer	0	0	0	0	0		0	0		0	0	0		0	0	0		1	0
Asteropus_vasiformis	0	0	0	0	0		0	0		0	0	0		0	0	0		1	0
Asterpus_niger	1	0	0	0	0		0	0		0	0	0		0	0	0		0	0
Auletta_syncinularia	1	0	0	0	0		0	0		0	0	0		0	1	0		1	0
Auletta_tuberosa	0	0	0	0	0		0	0		0	0	0		0	0	0		0	0
Axinella_corrugata	1	1	0	0	0		0	0		0	0	1		1	1	1		0	0
Axinella_digitiformis	0	0	0	1	0		0	0		0	0	0		0	0	0		0	0
Axinella_polycapella	1	0	0	0	0		1	0		0	0	0		0	0	0		0	0
Axinella_pomponiae	1	0	0	0	0		0	0		0	0	0		0	0	0		0	0
Axinella_waltonsmithi	1	0	0	0	0		0	0		0	0	0		0	0	0		0	0
Axinyssa_ambrosia	0	1	0	0	0		1	0		0	0	0		0	0	1		1	0
Axinyssa_litophaga	1	0	0	1	0		0	0		1	0	0		0	0	0		0	0
Batzella_rosea	0	0	0	0	0		1	0		0	0	0		0	0	1		0	0
Biemna_caribea	1	1	0	0	0		1	1		0	1	1		1	1	0		0	0
Biemna_cribaria	1	0	0	1	0		0	0		1	0	0		0	0	0		1	0
Biemna_demuthi	0	0	0	0	0		1	0		0	0	0		0	0	0		0	0
Biemna_ehrenbergi	0	0	0	0	0		0	0		0	0	1		0	0	0		0	0
Biemna_sp	0	0	0	0	0		0	0		0	0	0		0	1	0		0	0
Bubaris_ammosclera	0	0	0	0	0		0	0		0	0	1		0	0	0		1	0
Bubaris_incrustata	1	0	0	0	0		0	0		0	0	0		0	0	0		0	0
Cacospongia_sp	1	0	0	0	0		0	0		0	0	0		0	0	0		0	0
Calcifibrospongia_actinostromarioides	0	0	0	0	0		0	0		0	0	0		0	0	0		0	0
Callysongia_densasclera	0	0	0	1	0		0	0		0	0	0		0	0	0		0	0
Callyspongia_arcesiosa	1	0	0	0	0		0	0		0	1	0		1	0	0		0	0
Callyspongia_armigera	1	0	1	1	1		1	0		0	0	1		0	1	0		0	0
Callyspongia_cf_eschrichti	0	0	0	0	1		0	0		0	0	0		0	0	0		0	1
Callyspongia_fallax	1	0	1	1	0		1	1		0	1	1		1	1	1		0	0
Callyspongia_longissima	0	0	0	0	0		0	0		0	0	0		0	0	0		0	0
Callyspongia_pallida	1	0	0	1	0		0	1		1	1	1		1	0	0		0	0
Callyspongia_plicifera	1	0	1	1	1		1	0		0	0	1		1	0	1		0	1
Callyspongia_strongylophora	0	1	0	1	0		1	0		0	0	0		0	0	0		0	0
Callyspongia_tenerrima	1	0	0	0	0		0	0		0	0	0		0	0	0		0	0
Callyspongia_vaginalis	1	1	1	0	0		1	1		1	1	1		1	1	1		0	1
Callyspongiaarmigera	0	0	0	0	0		1	0		0	0	0		0	0	0		0	0
Calyx_podatypa	0	1	1	1	0		0	1		1	1	1		1	1	0		0	0
Calyxcf_podatypa	0	0	0	0	0		0	0		0	0	0		0	0	0		1	0
Caminus_sphaeroconia	0	0	0	0	0		0	0		0	0	0		0	0	0		1	0
Ceratoporella_nicholsoni	1	0	0	1	1		0	0		0	0	0		0	0	0		0	0
Cervicornia_cuspidifera	1	0	0	0	0		0	1		0	1	1		0	0	0		0	0
Chalinula_molitba	1	0	0	1	0		0	1		0	1	0		1	1	1		0	0
Chalinula_renieroides	0	0	0	0	0		0	0		0	0	0		0	0	1		0	0
Chalinula_zeae	0	0	0	1	0		0	0		0	1	1		0	0	0		0	0
Characella_aspera	0	0	0	0	0		0	0		0	0	0		0	0	0		1	0
Chelonaplysillaerecta	1	1	0	0	1		0	1		0	1	1		1	1	0		0	0
Chondrilla_caribensis_f_caribensis	1	0	0	0	1		0	1		0	1	0		1	0	0		0	0
Chondrilla_caribensis_f_hermatypica	1	0	0	1	1		1	1		0	1	1		1	0	0		1	0
Chondrosia_collectrix	1	0	0	0	0		0	1		1	1	0		1	0	0		0	0
Chondrosia_reniformis	1	0	0	1	1		0	0		0	0	0		0	0	0		0	0
Cinachyrella_alloclada	1	0	0	1	1		1	0		1	1	0		1	0	0		0	0
Cinachyrella_apion	0	0	0	0	0		0	1		0	1	1		1	0	0		0	0
Cinachyrella_arenosa	0	0	0	0	0		0	0		0	0	0		0	0	0		1	0
Cinachyrella_kuekenthalli	1	0	0	1	1		1	1		0	0	0		0	0	0		1	0
Cinachyrella_minuta	0	1	0	0	0		0	0		0	0	0		0	0	0		0	0
Cinachyrella_sp	0	0	1	1	0		0	0		0	0	0		0	0	0		0	0
Ciocalypta_pseudoporrecta	1	0	0	0	0		0	0		0	0	0		0	0	0		1	0
Ciocalypta_sp	0	0	0	0	0		0	1		0	0	0		0	0	0		0	0
Clathria_aff_schoenus	0	0	0	0	0		0	1		0	0	0		0	0	0		0	0
Clathria_affinis	0	0	0	0	0		1	1		0	0	0		0	1	1		0	0
Clathria_armata	0	0	0	0	0		0	0		0	0	1		0	0	0		0	0
Clathria_bulbotoxa	0	0	0	0	0		0	0		0	0	0		0	1	1		0	0
Clathria_calla	1	1	0	1	0		1	0		0	0	1		0	0	1		0	1
Clathria_cf_dentata	1	0	0	0	0		0	0		0	0	0		0	0	0		0	0
Clathria_cf_ferrea	0	0	0	0	1		0	1		0	1	0		1	0	0		0	0
Clathria_echinata	1	0	0	0	0		0	0		0	1	1		0	1	1		0	0
Clathria_fascicularis	0	0	0	0	0		1	0		0	0	0		0	0	0		0	0
Clathria_ferrea	0	0	0	0	0		0	0		0	1	0		0	0	1		0	0
Clathria_foliacea	0	0	0	0	0		1	0		0	0	0		0	0	0		0	0
Clathria_hymedesmioides	0	0	0	0	0		0	0		0	0	0		0	1	1		0	0
Clathria_isodictyoides	0	0	0	0	0		0	0		0	0	0		0	1	1		0	0
Clathria_juniperina	0	0	0	0	0		1	1		0	0	0		1	0	0		0	0
Clathria_microchela	0	0	0	0	0		0	1		0	1	1		1	0	0		0	0
Clathria_mima	0	0	0	0	0		0	0		0	0	1		0	0	0		0	0
Clathria_minuta	1	0	0	0	0		0	0		0	0	0		0	1	1		0	0
Clathria_oxeota	1	0	0	1	1		0	0		0	0	0		0	1	1		0	0
Clathria_plana	0	0	0	0	0		1	0		0	0	0		0	0	0		0	0
Clathria_prolifera	0	0	0	0	0		1	0		0	0	0		0	0	0		0	0
Clathria_raraechelae	0	0	0	1	0		0	0		0	0	0		0	1	1		0	0
Clathria_rarispinosa	0	0	0	1	0		0	0		0	0	1		0	0	0		0	0
Clathria_schoenus	1	0	0	1	0		1	1		1	1	0		1	1	1		0	0
Clathria_spinosa	1	0	0	0	0		0	1		0	0	1		0	1	1		0	0
Clathria_strepsitoxa	0	0	0	0	0		0	0		0	0	1		0	0	0		0	0
Clathria_toxitenuis	0	0	0	0	0		0	0		0	0	1		0	0	0		0	0
Clathria_venosa	1	0	0	0	0		1	1		0	1	0		1	1	0		0	0
Clathria_virgultosa	1	0	0	1	0		1	1		1	0	0		0	0	0		0	0
Clathrina_cf_panis	0	0	0	0	0		0	0		0	0	0		0	0	0		0	0
Clathrina_primordialis	1	0	0	1	1		0	1		0	1	0		1	0	0		0	0
Clathrina_sp	0	0	0	0	0		0	0		0	0	0		0	1	0		0	0
Claviscopulia_facunda	1	0	0	0	0		0	0		0	0	0		0	0	0		0	1
Cliona_amplicavata	1	0	0	0	0		0	0		0	0	0		0	1	0		0	0
Cliona_aprica	0	0	1	1	1		0	1		0	1	0		1	0	0		0	0
Cliona_caribbaea	1	0	0	0	1		0	1		1	1	0		1	0	0		0	0
Cliona_celata	0	0	0	0	0		1	0		0	0	0		0	0	0		0	0
Cliona_delitrix	1	0	1	1	1		1	1		0	1	0		1	1	0		0	0
Cliona_dioryssa	0	0	0	0	0		1	0		0	0	1		0	0	0		0	0
Cliona_janitrix	0	0	0	1	0		0	0		0	0	0		0	1	0		0	0
Cliona_langae	1	0	1	1	0		0	0		0	0	0		0	0	0		0	0
Cliona_laticavicola	1	0	0	1	0		0	0		1	0	0		0	0	0		0	0
Cliona_paucispina	1	0	0	0	0		0	1		0	0	0		0	0	0		0	0
Cliona_peponacea	1	0	0	1	0		0	0		0	0	0		1	0	0		0	0
Cliona_raphida	1	0	0	0	0		0	0		0	0	0		1	0	0		0	0
Cliona_schmidti	1	0	0	1	0		0	1		0	0	0		0	1	0		0	0
Cliona_subulata	0	0	0	0	0		1	0		0	0	0		0	0	0		0	0
Cliona_tenuis	0	0	0	0	1		0	1		0	1	1		1	0	0		0	0
Cliona_varians	1	0	1	1	1		1	1		0	1	0		1	1	0		0	1
Cliona_vermifera	1	0	0	1	0		1	0		0	0	0		0	1	0		0	0
Coelosphaera_hechteli	1	1	0	0	0		0	0		0	1	0		0	0	0		0	0
Coelosphaera_raphidifera	1	0	0	0	0		1	1		0	1	0		0	0	0		1	0
Columnitis_anomala	0	0	0	0	0		0	0		0	0	0		0	0	0		0	0
Columnitis_squamata	1	0	0	0	0		0	0		0	0	0		0	0	0		0	0
Corallistes_paratypus	0	0	0	0	0		0	0		0	0	0		0	0	0		1	0
Corallistes_typus	1	0	0	0	0		0	0		0	0	0		0	0	0		1	0
Craniella_schmidtii	0	0	0	0	0		0	0		0	0	0		0	0	0		0	1
Craniella_tethyoides	0	0	0	0	0		0	0		0	0	0		0	0	0		0	0
Crella_chelifera	1	0	0	0	0		0	0		0	0	0		0	0	0		1	0
Crella_cyatophora	0	0	0	0	0		0	0		0	0	1		0	0	0		0	0
Cribrochalina_vasculum	1	0	0	1	0		1	1		0	0	1		0	0	0		0	1
Cyamon_vickersi	1	0	0	0	0		0	0		0	0	0		0	0	1		0	0
Cyrtaulon_sigsbeei	1	0	0	0	0		0	0		0	0	0		0	0	0		1	1
Dactylocalyx_crispus	1	0	0	0	0		0	0		0	0	0		0	0	0		0	0
Dactylocalyx_pumiceus	1	0	0	0	0		0	0		0	0	0		0	0	0		1	0
Damiria_leonorae	0	0	0	0	0		0	0		0	0	0		0	1	1		0	0
Darwinella_rosacea	1	0	0	1	0		0	1		0	0	0		1	0	0		0	0
Dercitus_sp	0	0	0	0	0		0	1		0	0	0		0	1	0		0	0
Desmacella_annexa	0	0	0	0	0		0	0		0	0	0		0	0	0		1	0
Desmacella_janiae	0	0	0	0	0		1	0		0	0	0		0	0	0		0	0
Desmacella_meliorata	0	0	0	0	0		0	1		0	0	0		1	0	0		0	0
Desmacella_polysigmata	0	0	0	0	0		0	0		0	0	0		0	0	0		1	0
Desmacella_pumilio	1	0	0	0	0		0	0		0	0	0		0	0	0		0	0
Desmanthus_incrustans	0	0	0	0	0		1	0		0	0	0		0	0	0		0	0
Desmapsamma_anchorata	1	0	1	1	0		0	1		1	1	1		1	1	1		1	0
Diaretula_cornu	1	0	0	0	0		0	0		0	0	0		0	0	0		0	0
Diaretula_muretta	1	0	0	0	0		0	0		0	0	0		0	0	0		0	0
Dictyonella_arenosa	0	0	0	0	0		0	1		0	0	0		0	0	0		0	0
Dictyonella_foliaformis	0	0	0	1	0		0	0		0	0	0		0	0	0		0	0
Dictyonella_funicularis	1	0	1	0	0		0	1		0	0	1		1	0	0		0	0
Dictyonella_sp1	0	0	0	0	0		0	1		0	0	0		0	0	0		0	0
Dictyonella_sp2	0	0	0	0	0		0	0		0	0	0		0	1	0		0	0
Didiscus_oxeata_3	1	0	0	1	0		0	1		0	0	0		0	1	1		0	0
Diplastrella_megastellata	0	0	1	1	0		0	1		0	1	0		1	1	0		0	0
Diplastrella_sp	0	0	1	0	0		0	0		0	0	0		1	0	0		0	0
Discodermia_dissoluta	1	0	0	0	0		0	1		0	1	1		0	1	0		0	0
Discodermia_inscripta	1	0	0	0	0		0	0		0	0	0		0	0	0		0	0
Discodermia_polydiscus	1	0	0	0	0		0	0		0	0	0		0	0	0		1	1
Discodermia_sp	0	0	0	1	0		0	0		0	0	0		0	0	0		0	0
Dragmacidon_explicata	0	0	0	0	0		0	0		0	0	0		0	0	0		0	0
Dragmacidon_reticulatum	1	0	1	1	0		1	1		1	1	1		1	0	1		0	0
Dragmaxia_undata	0	0	0	0	0		0	0		0	0	1		0	1	1		0	0
Dragmaxia_variabilis_3	0	0	0	0	0		0	0		0	0	1		0	0	0		0	0
Dysidea_etheria	1	0	1	1	1		1	1		1	1	1		1	1	0		0	1
Dysidea_fragilis	1	0	0	0	0		1	0		0	0	0		0	0	0		0	0
Dysidea_janiae	1	0	1	1	0		1	0		1	0	1		0	0	0		0	1
Dysidea_tubulata	0	0	0	1	0		0	0		0	0	0		0	0	0		0	0
Dysidea_varibilis	1	0	0	0	0		0	0		0	0	0		0	0	0		0	1
Echinochalina_melana	0	0	0	0	0		0	0		0	0	0		0	0	0		1	0
Echinoclathria_arcifera	1	0	0	0	0		0	0		0	0	0		0	0	0		0	0
Echinostylinus_reticulatus	0	0	0	0	0		0	0		0	0	1		0	0	0		0	0
Ecionemia_megastylifera	1	0	0	0	0		0	1		1	1	1		0	0	0		0	1
Ectyoplasia_ferox	1	0	1	1	1		1	1		0	1	1		1	1	0		0	1
Epipolasis_profunda	0	0	0	0	0		0	0		0	0	0		0	0	0		0	0
Erylus_amphiastera	0	0	0	0	0		0	0		0	0	1		0	0	0		0	0
Erylus_bahamensis	1	0	0	0	0		0	0		0	0	0		0	0	0		0	0
Erylus_formosus	0	0	0	1	0		1	1		0	1	0		1	1	0		0	0
Erylus_goffrileri	0	0	0	1	0		0	1		0	0	0		0	0	0		0	0
Erylus_ministrongylus	1	0	0	1	0		0	0		0	0	0		0	0	0		0	0
Erylus_transiens	0	0	0	0	0		0	0		0	0	0		0	0	0		1	0
Erylus_trisphaerus	1	0	0	0	0		0	0		0	0	0		0	0	1		0	0
Euplectella_cf_jovis	1	0	0	0	0		0	0		0	0	0		0	0	0		0	0
Eurypon_clavatum	0	0	0	0	0		1	0		0	0	1		0	0	0		0	0
Eurypon_viride	1	0	0	0	0		1	0		0	0	0		0	0	0		0	0
Fangophilina_submersa	0	0	0	0	0		1	0		0	0	0		0	0	0		0	0
Fasciospongia_cf_sp	0	0	0	0	0		0	1		0	0	0		0	0	0		0	0
Forcepia_colonensis	0	0	0	0	0		0	0		0	0	0		0	0	1		1	0
Forcepia_grandisigmata	1	0	0	1	0		0	0		0	0	0		0	0	0		0	0
Gastrophanella_implexa	1	0	0	0	0		0	0		0	0	0		0	0	0		1	0
Gellius_sp	0	0	0	0	0		0	1		0	0	0		0	0	0		0	0
Geodia_gibberosa	1	0	0	1	0		1	1		1	1	1		1	0	0		1	0
Geodia_megastrella	1	0	0	0	0		0	0		0	0	0		0	0	0		1	0
Geodia_papyracea	1	0	0	1	0		1	1		0	1	1		1	0	0		0	0
Geodia_thomsoni	1	0	0	0	0		0	0		0	0	0		0	0	0		0	0
Goreauiella_auriculata	0	0	0	1	0		0	0		0	0	0		0	0	0		0	0
Halichlona_vansoesti	0	0	0	1	0		0	0		0	1	0		0	1	1		0	0
Halichondria_bowerbanki_1	0	0	0	0	0		0	0		0	0	1		0	0	0		0	0
Halichondria_corrugata	1	0	0	0	0		0	0		0	0	0		0	0	0		0	0
Halichondria_lutea	1	0	0	0	0		0	0		0	1	0		1	0	0		0	0
Halichondria_magniconulosa	1	1	0	1	0		0	1		1	1	0		1	0	1		0	0
Halichondria_melanadocia	1	0	0	1	0		0	1		1	1	1		1	0	0		0	0
Halichondria_panicea_1	0	0	0	0	0		0	0		0	0	1		0	0	0		0	0
Halichondria_poa_9	0	0	0	0	0		0	1		0	0	0		0	0	0		0	0
Halichondria_sp	0	0	0	0	0		0	0		0	0	0		0	1	0		0	0
Halichondria_stylata	0	0	0	0	0		0	0		0	0	0		1	0	0		0	0
Haliclona_aff_curacaoensis	0	0	0	0	0		0	1		0	0	0		0	0	0		0	0
Haliclona_albifragilis	0	0	0	1	0		0	0		0	0	0		0	1	1		1	0
Haliclona_cf_piscaderaensis	1	0	0	0	0		0	0		0	0	0		0	0	0		0	0
Haliclona_coerulea	1	1	0	1	0		1	0		0	1	1		1	0	1		0	1
Haliclona_curacaoensis	1	0	0	0	0		0	1		0	1	0		1	1	1		0	0
Haliclona_epiphytica	0	0	0	0	0		0	0		0	0	1		0	0	0		0	0
Haliclona_implexiformis	1	1	1	1	0		1	1		1	1	1		1	1	1		0	1
Haliclona_lehnerti	0	0	0	1	0		0	0		0	0	0		0	0	0		0	0
Haliclona_luciensis	0	0	0	0	0		0	0		0	0	0		0	0	0		0	1
Haliclona_magnifica	0	0	0	0	0		0	1		0	1	0		1	0	0		0	0
Haliclona_manglaris	1	0	0	0	0		0	1		0	1	0		1	0	0		0	0
Haliclona_melana	0	0	0	0	0		0	0		0	0	0		0	0	0		0	0
Haliclona_mucifibrosa	0	0	0	0	0		1	1		0	1	0		0	0	0		0	0
Haliclona_piscaderaensis	0	0	0	1	0		0	1		1	1	1		1	1	1		0	0
Haliclona_ruetzleri	0	0	0	0	0		0	1		0	0	0		1	0	0		0	0
Haliclona_smithae	0	0	0	0	0		0	1		0	1	0		1	0	0		0	0
Haliclona_stoneae	0	0	0	0	0		0	1		0	0	0		0	0	0		0	0
Haliclona_tenerrima	0	0	0	0	0		0	1		0	0	0		0	0	0		0	0
Haliclona_tubifera	1	0	0	1	0		0	1		0	1	1		1	1	1		0	0
Haliclona_twincayensis	0	0	0	0	0		0	1		0	1	0		1	0	0		0	0
Haliclona_walentinae	0	0	0	0	0		0	0		0	1	0		0	0	0		0	0
Haliclonavermeuleni	0	1	0	0	0		0	1		0	1	0		0	0	1		0	0
Halisarca_caerulea	1	0	0	0	0		0	1		0	1	0		1	0	0		0	0
Halisarca_purpura	0	0	0	0	0		1	0		0	0	0		0	0	0		0	0
Halisarca_sp_2	0	0	0	0	0		0	0		0	0	0		0	1	0		0	0
Halisarca_sp1	0	0	0	0	0		0	0		0	0	0		0	1	0		0	0
Halisarca_sprestingiesis	0	0	1	0	0		0	1		0	1	0		1	0	0		0	0
Higginsia_strigilata	0	0	0	0	0		1	0		0	0	0		0	0	0		0	0
Hispidopetra_miniana	1	0	0	1	0		0	0		0	0	0		0	0	0		0	0
Hyalonema_kenti	1	0	0	0	0		0	0		0	0	0		0	0	0		0	0
Hyattella_cavernosa	1	0	1	1	0		0	1		0	0	1		0	1	0		0	0
Hymedesmia_agariciicola	0	0	0	0	0		0	0		0	0	0		0	1	1		0	0
Hymedesmia_campechiana	1	0	0	0	0		1	0		0	0	0		0	0	0		0	0
Hymedesmia_curacaoensis	0	0	0	0	0		0	0		0	0	0		0	1	1		0	0
Hymedesmia_palmatichelifera	0	0	0	0	0		0	0		0	0	0		0	1	1		0	0
Hymedesmia_peachi	0	0	0	0	0		0	0		0	0	1		0	0	0		0	0
Hymedesmia_sp	0	0	0	0	0		0	1		0	0	0		0	0	0		0	0
Hymeniacidon_caerulea	1	1	0	0	0		0	1		1	1	0		0	0	1		0	0
Hymeniacidon_heliophila	1	0	0	0	0		0	0		0	1	0		0	0	1		0	0
Hymeniacidon_sp	0	0	0	0	0		0	0		0	0	0		0	1	0		0	0
Hyppospongia_gossypina	1	0	0	0	0		0	0		0	0	0		0	0	0		0	0
Hyppospongia_lachne	1	0	0	0	0		1	0		0	0	0		0	0	1		0	0
Hyrtios_cf_caracasensis	0	0	0	0	1		0	0		0	0	0		1	0	0		0	0
Hyrtios_proteus	1	0	1	0	0		0	1		0	1	0		1	0	0		0	0
Hyrtios_violaceus	1	0	0	1	1		0	1		0	0	0		0	1	1		0	0
Igernella_notabilis	1	0	0	1	0		0	0		0	1	0		0	0	1		0	0
Iotrochota_agglomerata	0	0	0	1	0		0	0		0	0	0		0	0	0		0	0
Iotrochota_arenosa	0	0	0	0	0		0	0		0	0	0		0	0	0		0	0
Iotrochota_atra	0	0	0	1	1		0	0		0	0	0		0	0	0		0	0
Iotrochota_birotulata	1	1	1	1	1		1	1		1	1	1		1	1	1		1	0
Iotrochota_sp	0	0	0	0	0		0	0		0	0	0		1	0	0		0	0
Iphiteon_panicea	1	0	0	0	0		0	0		0	0	0		0	0	0		0	0
Ircinia_campana	1	0	1	0	0		1	1		1	1	1		1	0	0		0	0
Ircinia_cf_campana	0	0	0	0	0		0	0		0	0	0		0	0	0		0	0
Ircinia_cf_dendroides	0	0	0	0	0		0	0		0	0	0		0	0	0		1	0
Ircinia_cf_felix	0	0	0	0	0		0	0		0	0	0		0	0	0		0	0
Ircinia_felix	1	0	1	1	1		1	1		1	1	1		1	1	0		0	0
Ircinia_hummelincki	1	0	0	0	0		0	0		0	0	0		0	0	0		1	0
Ircinia_strobilina	1	0	1	1	1		1	1		1	1	1		1	1	0		0	0
Jaspis_velezi	0	0	0	0	0		0	0		0	0	1		0	0	0		0	0
Julavis_jamaicensis	0	0	0	1	0		0	0		0	0	0		0	0	0		0	0
Leiodermatium_lynceus	0	0	0	0	0		0	0		0	0	0		0	0	0		1	0
Leiodermatium_pfeifferae	1	0	0	0	0		0	0		0	0	0		0	0	0		0	0
Leucandra_aspera	0	0	1	0	0		0	1		0	1	0		0	0	0		0	0
Leucandra_barbata	0	0	1	0	0		0	0		0	0	0		0	0	0		0	0
Leucetta_aff_floridana	0	0	0	1	1		0	0		0	0	0		0	0	0		0	0
Leucetta_imberbis	0	0	0	0	0		0	0		0	0	0		0	0	0		0	1
Lissodendoryx_acanthostylota	0	0	0	0	0		0	0		0	0	0		0	0	0		0	0
Lissodendoryx_amphispinulata	0	0	0	0	0		0	0		0	0	0		0	0	0		0	0
Lissodendoryx_carolinensis	0	0	0	0	0		0	1		0	0	0		0	0	0		0	0
Lissodendoryx_colombiensis	0	0	0	0	0		0	1		0	1	1		1	0	0		0	0
Lissodendoryx_isodictyalis	1	0	0	0	0		1	1		0	1	1		1	1	1		0	0
Lissodendoryx_sigmata	0	0	0	0	0		1	1		0	1	1		0	0	0		0	0
Lissodendoryx_spinulosa	0	0	0	0	0		0	1		0	0	0		0	1	0		0	0
Lissodendoryx_stephensoni	0	0	0	0	0		0	0		0	0	1		0	0	0		0	0
Lissodendoryx_strongylata	0	0	0	0	0		0	1		0	0	0		0	0	1		0	0
Lissodendoryxmicroraphida	1	0	0	0	0		0	0		0	0	0		0	0	0		0	0
Melophlus_ruber	0	0	0	1	0		0	0		0	0	0		0	0	0		0	0
Merlia_normani	1	0	0	1	0		1	0		0	1	0		0	1	0		0	0
Monanchora_arbuscula	1	0	1	0	0		1	1		1	1	1		0	1	1		1	1
Mycale_aff_magnirhaphidifera	0	0	0	0	0		0	1		0	1	0		0	0	0		0	0
Mycale_aff_microsigmatosa	0	0	0	0	0		0	1		0	0	0		0	0	0		0	0
Mycale_americana	0	0	0	0	0		0	0		0	0	0		1	1	1		0	0
Mycale_angulosa	1	0	0	1	0		1	1		1	0	0		1	1	1		0	1
Mycale_arenaria	0	0	0	0	0		0	1		0	1	0		0	0	0		0	0
Mycale_arndti	0	0	1	0	0		0	1		0	0	1		0	1	1		0	1
Mycale_carmigropila	0	0	0	0	0		0	1		0	1	0		1	0	0		0	0
Mycale_cf_americana	0	0	0	0	0		0	0		0	0	0		1	0	0		0	0
Mycale_citrina	0	0	0	0	0		0	1		0	1	1		1	0	0		0	0
Mycale_diversisigmata	0	0	0	0	0		0	0		0	0	0		0	1	1		0	0
Mycale_escarlatei	0	0	0	0	0		0	1		0	0	0		0	0	0		0	0
Mycale_flagellifera	0	0	0	0	0		0	0		0	0	1		0	0	0		0	0
Mycale_imperfecta	0	0	0	0	0		0	0		0	0	1		0	0	0		0	0
Mycale_jamaicaensis	0	0	0	1	1		0	0		0	0	0		0	0	0		0	0
Mycale_laevis	1	1	1	1	1		1	1		1	1	1		1	1	1		0	0
Mycale_laxissima	1	1	1	1	1		1	1		1	1	1		1	1	1		0	1
Mycale_magnirhaphidifera	1	0	0	0	0		0	1		0	1	0		1	1	1		0	0
Mycale_massa	0	0	0	0	0		0	0		0	0	1		0	0	0		0	0
Mycale_microsigmatosa	1	1	0	1	0		0	1		0	1	1		1	1	1		0	1
Mycale_mucifluens	0	0	0	0	1		0	0		0	0	0		0	0	0		0	0
Mycale_Paresperella	0	0	0	0	0		0	1		0	1	0		0	0	0		0	0
Mycale_parishi	0	0	0	0	0		0	0		0	0	1		0	0	0		0	0
Myliusia_callocyathus	1	0	0	0	0		0	0		0	0	0		0	0	0		1	1
Myliusia_conica	1	0	0	0	0		0	0		0	0	0		0	0	0		0	0
Myrmekioderma_gyroderma	1	0	1	1	1		0	1		0	1	1		1	1	0		1	0
Myrmekioderma_rea	1	1	0	1	0		0	1		0	0	0		1	1	0		1	0
Myxilla_mucronata	0	0	0	1	0		0	0		0	0	0		0	0	0		0	0
Neoaulocystis_grayi	1	0	0	0	0		0	0		0	0	0		0	0	0		1	1
Neoaulocystis_superstes	1	0	0	0	0		0	0		0	0	0		0	0	0		0	0
Neofibularia_nolitangere	1	0	1	1	1		0	1		0	1	1		1	1	1		0	1
Neopelta_amphiaster	1	0	0	0	0		0	0		0	0	0		0	0	0		0	0
Neopelta_imperfecta	1	0	0	0	0		0	0		0	0	0		0	0	0		1	0
Neopetrosia_carbonaria	1	0	1	1	0		0	1		1	0	1		1	0	0		1	0
Neopetrosia_proxima	0	0	1	0	0		0	1		1	1	1		1	0	0		0	0
Neopetrosia_rosariensis	0	0	0	0	0		0	0		0	1	1		1	0	0		1	0
Neopetrosia_subtriangularis	1	0	0	1	0		1	1		1	1	1		1	0	0		0	0
Neophrissospongia_tubulatus	0	0	0	0	0		0	0		0	0	0		0	0	0		1	0
Niphates_alba	1	1	1	0	0		0	0		0	0	1		0	0	0		0	1
Niphates_amorpha	1	0	0	0	0		0	0		1	0	0		0	0	0		0	0
Niphates_caycedoi	0	0	0	0	0		0	1		1	1	1		1	0	0		0	0
Niphates_digitalis	1	0	1	1	1		1	1		1	0	1		0	0	0		1	1
Niphates_erecta	1	1	1	1	1		1	1		1	1	1		1	1	1		0	1
Niphates_recondita	1	0	0	0	0		0	0		0	0	0		0	0	1		0	0
Niphates_sp	0	0	0	0	0		0	1		0	0	0		0	1	0		0	0
Nucleotethya_bifida	0	0	0	0	0		0	0		0	0	0		0	0	0		0	0
Oceanapia_bartschi	1	1	0	1	1		0	0		1	1	1		1	0	0		0	0
Oceanapia_fistulosa	1	0	0	1	0		0	1		0	1	0		0	0	0		0	0
Oceanapia_nodosa	1	0	0	1	0		0	0		0	1	1		1	0	0		0	0
Oceanapia_oleracea	0	0	0	0	0		0	0		0	1	1		0	0	0		0	0
Oceanapia_peltata	1	0	0	0	0		0	0		0	1	1		0	0	0		0	0
Oceanapia_stalagmitica	1	0	0	0	0		0	0		0	0	0		0	0	0		0	0
Oscarella_sp	0	0	0	0	1		0	1		0	1	0		0	0	0		0	0
Pachastrella_abyssi	1	0	0	0	0		0	0		0	0	0		0	0	0		1	0
Pachataxa_cf_lutea	0	0	0	1	0		0	0		0	0	0		1	0	0		0	0
Pachataxa_lithistina	1	0	0	0	0		0	0		0	0	0		0	0	0		0	0
Pachataxa_sp	1	0	0	0	0		0	0		0	0	0		0	0	0		0	0
Pachymatisma_geodiformis	0	0	0	0	0		0	0		0	0	0		0	0	0		1	0
Pandaros_acanthifolium	1	0	0	1	1		0	0		0	0	1		1	1	1		0	1
Penares_cortius	0	0	0	0	0		0	0		1	0	0		0	0	0		0	0
Penares_mastoidea	0	0	0	0	0		0	0		0	0	0		0	0	0		1	1
Petromica_ciocalyptoides	0	0	0	0	0		0	0		0	0	1		1	0	0		0	0
Petrosia_davilai	1	0	0	0	0		0	1		0	0	0		0	0	0		0	0
Petrosia_dendyi	0	0	0	0	0		0	0		0	0	0		0	0	0		1	0
Petrosia_dura	1	1	0	0	0		0	0		0	0	0		0	0	0		0	0
Petrosia_hartmani	0	0	0	0	0		0	0		0	0	0		0	0	0		1	0
Petrosia_massiva	0	0	0	1	1		0	0		0	0	0		0	0	0		0	0
Petrosia_pellasarca	1	0	1	1	1		0	1		1	0	1		1	1	0		1	0
Petrosia_stoneae	0	0	0	0	0		0	0		0	0	0		0	0	0		1	0
Petrosia_weinbergi	1	1	1	1	1		1	1		1	0	1		1	1	0		0	0
Phakellia_bettinae	0	0	0	1	0		0	0		0	0	0		0	0	0		0	0
Phakellia_connexiva	0	0	0	0	0		0	0		0	0	0		0	0	0		0	1
Phakellia_folium	1	0	0	0	0		0	0		0	0	0		0	0	0		1	1
Phakellia_robusta	0	0	0	0	0		0	0		0	0	1		0	0	0		0	0
Pheronema_annae	1	0	0	0	0		0	0		0	0	0		0	0	0		0	0
Phlyctaenopora_halichondrioides	0	0	0	0	0		0	0		0	0	0		0	0	0		1	0
Phorbas_amaranthus	1	0	1	1	1		0	1		0	0	0		1	1	1		0	1
Pione_lampa	1	0	1	1	0		0	0		0	0	0		0	0	0		0	0
Pione_vastifica	0	0	0	0	0		1	0		0	0	1		0	0	0		0	0
Placospongia_carinata	0	0	0	0	0		1	0		0	0	0		0	0	0		0	0
Placospongia_intermedia	1	0	0	1	0		1	1		1	1	0		1	1	0		0	0
Placospongia_melobesioides	0	0	0	0	0		0	0		1	0	0		0	0	0		0	0
Plakina_elisa	0	0	0	0	0		0	0		0	1	0		0	0	0		0	0
Plakina_jamaicensis	0	0	0	1	0		0	1		0	0	0		0	0	0		0	0
Plakina_tetralopha	0	0	0	1	0		0	0		0	0	0		0	0	0		0	0
Plakina_trilopha	0	0	0	0	0		0	0		0	0	0		0	0	0		0	0
Plakina_versatilis	0	0	0	0	0		0	0		0	1	0		0	0	0		0	1
Plakinadilopha	0	0	0	0	0		0	0		0	0	0		0	0	0		0	0
Plakinamonolopha	0	0	0	0	0		0	0		0	0	0		0	0	1		0	0
Plakinastrella_onkodes	0	0	0	1	0		1	1		0	1	1		0	0	0		0	0
Plakortis_angulospiculatus	1	0	1	1	1		1	1		0	1	1		1	0	0		0	0
Plakortis_halichondrioides	0	0	1	1	1		1	1		0	1	1		0	0	0		0	0
Plakortis_simplex	1	0	0	1	1		1	1		0	1	0		1	1	0		0	0
Plakortis_zyggompha	1	0	0	0	0		0	0		0	0	0		0	0	0		0	0
Pleraplysilla_sp	0	0	0	0	0		0	0		0	0	0		0	0	0		0	0
Pleraplysilla_stocki	0	1	0	0	0		0	0		0	0	0		0	0	0		0	0
Plocamione_clopetaria	1	0	0	0	0		0	0		0	0	0		0	1	0		0	0
Poecillastra_sollasi	1	0	0	0	0		0	0		0	0	0		0	0	0		1	0
Polymastia_fordei	0	0	0	1	0		0	0		0	0	0		0	0	0		0	0
Polymastia_nigra	1	0	0	0	0		0	0		0	0	0		0	0	0		0	0
Polymastia_tenax	0	0	0	1	1		1	0		0	1	0		0	0	0		0	0
Prosuberites_laughlini	1	0	0	1	0		0	0		1	1	0		1	0	0		0	0
Prosuberites_scarlatum	1	0	0	0	0		0	0		0	0	0		0	0	0		0	0
Pseudaxinella_cf_spp	1	0	0	0	0		0	1		0	0	0		0	0	0		0	0
Pseudospongosorites_suberitoides	0	0	0	0	0		0	0		0	0	0		1	0	0		0	0
Pseudosuberites_sp	0	0	0	0	0		0	0		0	0	0		0	1	0		0	0
Pseudosuberites_sulphureus	0	0	0	0	0		1	0		0	0	1		0	0	0		0	0
Pseudotrachya_amaza	0	1	0	1	0		0	0		0	0	0		0	0	0		0	0
Ptilocaulis_marquezi	0	0	0	0	0		0	1		0	0	1		0	1	0		0	1
Ptilocaulis_walpersi_8	1	0	1	1	1		1	1		1	1	1		1	0	0		0	1
Racodiscula_asteroides	1	0	0	0	0		0	0		0	0	0		0	0	0		1	0
Racodiscula_sp	1	0	0	0	0		0	0		0	0	0		0	0	0		0	0
Radiella_sol	1	0	0	0	0		0	0		0	0	0		0	0	0		0	0
Raspailia_cf_Tenuis	0	0	0	0	0		0	0		0	0	0		0	0	0		1	0
Rhabderemia_minutula	0	0	0	0	0		1	0		0	0	0		0	0	0		0	0
Rhabderemia_pusilla	0	0	0	0	0		1	0		0	0	0		0	0	0		0	0
Rimella_clava	1	0	0	0	0		0	0		0	0	0		0	0	0		0	0
Samus_anonymus	0	0	0	0	0		0	0		0	0	1		0	0	0		0	0
Scleritoderma_cyanea	0	0	0	0	0		0	0		0	0	0		0	0	0		1	0
Scleroplegma_lanterna	1	0	0	0	0		0	0		0	0	0		0	0	0		0	0
Scleroplegma_seriatum	1	0	0	0	0		0	0		0	0	0		0	0	0		0	0
Scopalina_hispida	1	0	0	1	0		0	1		0	0	0		1	0	0		0	0
Scopalina_ruetzleri	1	0	1	1	1		1	1		1	1	1		1	1	0		0	0
Scopalinasp	0	0	0	0	0		0	1		0	0	0		0	0	0		0	0
Setidium_obtectum	1	0	0	0	0		1	0		0	0	0		0	0	0		0	0
Sidonops_neptuni	1	0	1	1	1		1	1		0	0	0		0	0	0		0	0
Sidonopscorticostylifera	0	0	0	0	0		0	0		0	0	0		1	0	0		0	0
Siphonidium_ramosum	1	0	0	0	0		0	0		0	0	0		0	0	0		1	0
Smenospongia_aurea	1	0	0	1	1		1	1		0	0	0		1	0	0		0	0
Smenospongia_cerebriformis	0	0	0	0	0		1	0		0	0	1		0	0	0		0	0
Smenospongia_conulosa	1	1	0	1	1		0	0		0	0	0		0	0	0		0	0
Smenospongia_sp	0	0	0	0	0		0	0		0	0	0		0	1	0		0	0
Spheciospongia_papillosa	0	0	0	0	0		1	0		0	0	0		0	0	0		0	0
Spheciospongia_vesparium	1	0	1	1	1		1	1		1	0	0		1	0	0		0	0
Spirastrella_coccinea	1	0	1	1	1		1	1		1	1	0		1	1	0		0	0
Spirastrella_hartmani	1	0	0	1	1		0	1		0	1	1		1	0	0		0	0
Spirastrella_mollis_aff_Hartmani	0	0	0	0	0		0	1		0	1	0		0	0	0		0	0
Spirastrella_sp1	0	0	0	0	0		0	0		0	0	0		0	1	0		0	0
Spongia_barbara	1	1	0	0	0		0	0		0	0	0		0	0	0		0	1
Spongia_graminea	1	0	0	0	0		0	0		0	0	0		0	0	0		0	0
Spongia_obliqua	1	0	0	0	0		1	0		0	0	0		0	0	0		0	0
Spongia_obscura	1	0	1	1	0		1	0		0	0	0		0	0	0		0	0
Spongia_pertusa	1	0	0	0	0		0	1		0	1	1		1	0	0		0	1
Spongia_tubulifera	1	0	0	0	0		0	1		0	1	1		1	1	1		0	0
Spongosorites_arenatus	0	0	0	0	0		0	0		0	0	0		0	0	0		0	0
Spongosorites_ruetzleri	0	0	0	0	0		0	0		0	0	0		0	0	0		1	0
Spongosorites_siliquaria	1	0	0	1	0		0	0		0	0	0		0	0	0		1	0
Stelleta_solidissima	1	0	0	0	0		0	0		0	0	0		0	0	0		0	0
Stelletta_aff_anancora	0	0	0	0	0		0	0		0	0	0		0	0	0		1	0
Stelletta_aff_gigas	0	0	0	0	0		0	0		0	0	0		0	0	0		1	0
Stelletta_aff_pumex	0	0	0	0	0		0	0		0	0	0		0	0	0		1	0
Stelletta_colombiana	0	0	0	0	0		0	0		0	0	1		0	0	0		0	0
Stelletta_fibrosa	1	0	0	0	0		0	0		0	1	0		0	0	0		0	0
Stelletta_kallitetilla	1	0	0	1	0		0	1		0	1	0		0	0	0		0	0
Stelletta_pudica	1	0	0	0	0		0	0		1	0	1		0	0	0		0	0
Stelletta_sp	0	0	0	0	0		0	0		0	1	0		0	0	0		0	0
Stromatospongia_norae	1	0	0	1	0		0	0		0	0	0		0	0	0		0	0
Stromatospongia_vermicola	1	0	0	1	1		0	0		0	0	0		0	0	0		0	0
Strongylacidon_griseum	1	0	0	0	0		0	0		0	0	0		0	0	0		0	0
Strongylacidon_poriticola	1	0	0	0	0		0	0		0	0	0		0	0	1		0	0
Strongylacidon_rubrum	0	1	0	0	0		0	0		0	0	0		0	0	1		0	0
Strongylacidon_sp	1	0	1	0	0		0	1		0	0	0		0	0	0		0	0
Strongylamma_baki	0	0	0	0	0		0	0		0	0	0		0	1	1		0	0
Stryphnus_sp	0	0	0	0	0		0	0		0	1	0		0	0	0		0	0
Stylissa_caribica	0	0	0	1	0		0	0		0	0	0		0	0	0		0	0
Suberites_aurantiacus	1	0	0	1	0		0	1		0	1	0		1	0	0		0	1
Suberites_domuncula	0	0	0	0	0		1	0		0	0	0		0	0	0		0	0
Sulcastrella_leviorum	0	0	0	0	0		0	0		0	0	0		0	0	0		1	0
Svenzea_cf_tubulosa	0	0	0	0	0		0	0		0	0	0		0	0	0		0	0
Svenzea_cristinae	0	0	0	1	0		0	1		0	0	0		0	0	0		0	0
Svenzea_flava	0	0	0	1	0		0	0		0	0	0		0	0	0		0	0
Svenzea_zeai	1	0	0	1	1		0	1		0	0	1		1	0	0		0	1
Sycon_sp	0	0	0	0	0		0	1		0	1	0		1	0	0		0	0
Tectitethya_crypta	1	0	1	1	1		1	0		0	1	0		1	0	0		0	0
Tectitethya_keyensis	0	0	0	0	0		0	0		0	1	0		0	0	0		0	0
Tectitethya_macrostella	0	0	0	0	0		0	0		0	0	0		0	0	0		0	0
Tectitethya_raphyroides	0	0	0	0	1		0	0		0	0	0		0	0	0		0	0
Tedania_ignis	1	1	1	1	0		1	1		1	1	1		1	1	1		0	1
Tedania_klausii	0	0	0	0	0		0	1		0	1	0		0	0	0		0	0
Terpios_belindae	0	0	0	0	0		0	1		0	0	0		0	0	0		0	0
Terpios_cf_fugax	1	0	0	0	0		0	0		0	0	0		0	0	0		0	0
Terpios_fugax	1	0	0	0	0		0	1		0	0	0		1	1	0		0	1
Terpios_manglaris	0	0	0	0	0		0	1		0	1	0		1	0	0		0	0
Tethya_actinia	1	0	0	0	0		1	1		0	1	1		1	0	0		0	0
Tethya_aff_seychellensis	0	0	0	1	0		0	0		0	1	0		1	0	0		0	0
Tethya_aurantium	1	0	0	0	0		0	0		0	0	0		0	0	0		0	0
Tethya_diploderma	0	0	0	1	0		0	0		0	0	0		0	0	0		0	0
Tethya_maza	0	0	0	1	0		0	0		0	0	1		0	0	0		0	0
Tethya_seychellensis	0	0	0	0	0		0	0		0	0	1		0	0	0		0	0
Tethya_sp	0	0	0	1	0		0	0		1	0	0		0	0	0		0	0
Tetilla_cranium	0	0	0	0	0		1	0		0	0	0		0	0	0		0	0
Tetilla_sigmophora	0	0	0	0	0		0	0		0	0	0		0	0	0		0	0
Theonella_atlantica	0	0	0	0	0		0	0		0	0	0		0	0	0		1	0
Thoosa_sp	1	0	0	0	0		0	0		0	0	0		0	0	0		0	0
Thrinacophora_funiformis	0	0	0	0	0		0	0		0	0	1		0	0	0		0	0
Thrombus_jancai	0	0	0	1	0		0	0		0	0	0		0	0	0		0	0
Thrombus_kittoni	0	0	0	0	0		0	0		0	1	0		0	0	0		1	0
Timea_hechteli	0	0	0	0	0		1	0		0	0	0		0	0	0		0	0
Timea_micraster	0	0	0	1	0		0	0		0	0	0		0	0	0		0	0
Timea_mixta	0	0	0	0	0		0	0		0	0	1		0	0	0		0	0
Timea_perastra	1	0	0	0	0		0	0		0	0	0		0	0	0		0	0
Timea_sp	1	0	0	0	0		0	0		0	0	0		0	0	0		0	0
Timea_stellata	1	0	0	0	0		0	0		0	0	1		0	0	0		0	0
Timea_stenosclera	0	0	0	0	0		0	0		0	0	0		0	0	0		1	0
Timea_unistellata	0	0	0	0	0		0	1		0	0	0		0	0	0		0	0
Topsentia_bahamensis	0	0	0	1	0		0	0		0	0	0		0	0	0		0	0
Topsentia_ophiraphidites	0	1	0	1	1		0	1		0	0	0		1	1	0		1	0
Verongula_gigantea	1	0	0	0	0		1	1		0	1	0		0	0	0		0	1
Verongula_reiswigi	1	0	0	0	0		0	1		0	1	0		1	0	0		0	0
Verongula_rigida	1	0	0	1	1		1	1		1	1	1		1	1	0		0	1
Vetulina_stalactites	0	0	0	0	0		0	0		0	0	0		0	0	0		1	0
Xestospongia_aff_muta	0	0	0	0	0		0	0		0	0	0		0	1	0		0	0
Xestospongia_arenosa	0	0	0	0	0		0	0		0	0	0		0	0	1		0	0
Xestospongia_bocatorensis	0	0	0	0	0		0	0		0	1	0		0	0	0		0	0
Xestospongia_caminata	0	0	0	1	1		0	0		0	0	0		0	0	1		0	0
Xestospongia_deweerdtae	0	0	0	0	0		0	0		0	1	0		0	0	1		0	0
Xestospongia_menzeli	0	0	0	0	0		1	0		0	0	0		0	0	0		0	0
Xestospongia_muta	1	0	1	1	1		1	1		1	1	1		1	0	0		0	0
Xestospongia_portoricensis	0	1	0	0	0		0	0		0	0	0		0	0	1		0	0
Xestospongia_wiedenmayeri	0	0	0	0	0		0	1		0	0	0		0	0	1		0	0
Xestospongiasp	0	0	0	0	0		0	0		0	0	0		0	1	0		0	0
Yucatania_sphaeroidocladus	0	0	0	0	0		1	0		0	0	0		0	0	0		0	0
