# Supplementary material for: Marine Biodiversity in the Caribbean: Regional Estimates and Distribution Patterns
Source: PLoS One. 2010 Aug 2;5(8):e11916. doi: 10.1371/journal.pone.0011916 (PMC2914069; doi:10.1371/journal.pone.0011916)
Supplement: Table S4 — List of zooxanthelate coral (Scleractinia) species of the Caribbean and countries by ecoregion where the species have been reported. Data compiled by Ernesto Weil, Jorge Cortés, and Carolina Bastidas. (0.03 MB XLS) [file pone.0011916.s004.xls]

## Sheet: Sheet1
Table S4. List of zooxanthelate coral (Scleractinia) species of the Caribbean and countries by ecoregion where the species have been reported. Data compiled by Ernesto Weil, Jorge Cortés, and Carolina Bastidas.
	Greater Antilles						Western Caribbean					Southwestern Caribbean					Southern Caribbean				Eastern Caribbean
SPECIES	CUBA	PUERTO RICO	HISPANIOLA	JAMAICA	CAYMAN ISLANDS		MEXICO	BELIZE	HONDURAS	GUATEMALA		COLOMBIA	COSTA RICA	PANAMA	NICARAGUA		Aruba - Bonaire-Curacao	VENEZUELA	TRINIDAD & TOBAGO		LESSER ANTILLES
Acropora_cervicornis	1	1	1	1	1		1	1	1	0		1	1	1	1		1	1	1		1
Acropora_palmata	1	1	1	1	1		1	1	1	0		1	1	1	1		1	1	1		1
Acropora_prolifera	1	1	1	1	1		1	1	1	0		1	0	1	1		1	1	0		1
Agaricia_fragilis	1	1	1	1	1		1	1	1	0		1	1	1	0		1	1	0		1
Agaricia_grahamae	1	1	1	1	1		1	0	1	1		1	0	1	1		1	1	0		1
Agaricia_lamarcki	1	1	1	1	1		1	1	1	0		1	0	1	0		1	1	0		1
Agaricia_undata	1	1	1	1	1		1	0	1	0		1	0	1	0		1	1	0		1
Helioseris_cucullata	1	1	1	0	1		1	1	1	1		1	1	1	1		1	1	1		1
Leptoseris_cailleti	0	1	0	0	0		0	0	0	0		0	0	0	0		0	1	0		0
Undaria_agaricites	1	1	1	1	1		1	1	1	1		1	1	1	1		1	1	1		1
Undaria_carinata	0	1	1	1	1		1	1	0	0		0	1	1	0		0	1	0		1
Undaria_crassa	0	0	0	0	0		0	0	0	0		0	0	1	0		0	0	0		0
Undaria_danae	0	1	1	1	1		1	0	1	0		0	1	1	1		0	1	0		1
Undaria_humilis	1	1	1	1	1		1	0	1	0		1	1	1	1		1	1	1		1
Undaria_purpurea	0	1	1	1	1		1	1	1	0		0	1	1	0		1	1	1		1
Undaria_pussilla	0	0	0	0	0		0	0	0	0		0	0	1	0		0	0	0		0
Undaria_tenuifolia	1	0	0	1	1		1	1	1	0		1	0	1	1		1	1	0		1
Madracis_auretenra	1	1	1	1	1		1	1	1	0		1	0	1	1		1	1	0		1
Madracis_carmabi	0	0	0	0	0		0	0	0	0		0	0	0	0		1	0	0		0
Madracis_decactis	1	1	1	1	1		1	1	1	1		1	1	1	1		1	1	1		1
Madracis_formosa	1	1	1	1	0		0	0	1	0		1	0	1	0		1	1	0		1
Madracis_myriaster	1	0	0	0	0		0	0	0	0		1	0	0	0		1	0	1		0
Madracis_pharensis_luciphila	0	1	1	1	1		0	0	1	0		0	0	1	0		1	1	1		1
Madracis_pharensis_pharensis	1	1	1	1	1		0	1	1	0		1	0	1	0		1	1	1		1
Madracis_senaria	1	1	1	1	1		0	0	1	0		1	0	1	0		1	1	0		1
Stephanocoenia_intersepta	1	1	1	1	1		1	1	1	1		1	1	1	0		1	1	1		1
Cladocora_arbuscula	1	1	1	1	0		1	1	1	0		1	1	1	0		1	1	0		1
Colpophyllia_amaranthus	0	1	1	0	1		0	0	0	0		1	0	1	0		1	1	0		1
Colpophyllia_natans	1	1	1	1	1		1	1	1	1		1	1	1	1		1	1	1		1
Diploria_clivosa	1	1	1	1	1		1	1	1	0		1	1	1	1		1	1	1		1
Diploria_labyrinthiformis	1	1	1	1	1		1	1	1	0		1	1	1	0		1	1	1		1
Diploria_strigosa	1	1	1	1	1		1	1	1	1		1	1	1	1		1	1	1		1
Favia_conferta	0	0	0	0	0		1	0	0	0		0	0	0	0		0	0	0		0
Favia_fragum	1	1	1	1	1		1	1	1	0		1	1	1	1		1	1	1		1
Favia_gravida	0	0	0	0	0		0	0	0	0		0	0	0	0		0	0	0		0
Favia_leptophylla	0	0	0	0	0		0	0	0	0		0	0	0	0		0	0	0		0
Manicina_areolata	1	1	1	1	1		1	1	1	1		1	1	1	1		1	1	1		1
Manicina_mayori	0	1	1	1	0		1	0	0	0		0	0	1	0		0	1	0		1
Montastraea_annularis	1	1	1	1	1		1	1	1	1		1	1	1	1		1	1	1		1
Montastraea_cavernosa1	1	1	1	1	1		1	1	1	1		1	1	1	1		1	1	1		1
Montastraea_cavernosa2	1	1	1	0	1		1	1	0	0		0	0	1	0		1	1	0		1
Montastraea_faveolata	1	1	1	1	1		1	0	1	1		1	0	1	1		1	1	1		1
Montastraea_franksi	1	1	1	1	1		1	0	1	1		1	1	1	1		1	1	1		1
Solenastrea_bournoni	1	1	1	1	1		1	0	1	0		1	0	1	1		1	1	1		1
Solenastrea_hyades	1	0	0	1	0		1	0	1	1		1	1	1	1		0	1	0		0
Dendrogyra_cylindrus	1	1	1	1	1		1	1	1	0		1	0	1	0		1	1	0		1
Dichocoenia_stellaris	0	1	1	1	0		0	0	1	0		1	1	1	0		1	1	0		1
Dichocoenia_stokesii	1	1	1	1	1		1	1	1	0		1	1	1	1		1	1	0		1
Eusmilia_fastigiata	1	1	1	1	1		1	1	1	1		1	1	1	1		1	1	1		1
Meandrina_braziliensis	0	0	0	0	0		0	0	0	0		0	0	0	0		0	0	0		0
Meandrina_caribbaea	0	1	1	1	1		0	0	0	0		0	0	1	0		1	1	0		1
Meandrina_danae	1	1	1	1	0		0	1	1	0		0	0	1	0		0	1	0		1
Meandrina_meandrites	1	1	1	1	1		1	1	1	1		1	1	1	1		1	1	1		1
Goreaugyra_memorialis	0	0	0	0	0		0	0	0	0		0	0	0	0		0	0	0		0
Isophyllastrea_rigida	1	1	1	1	1		1	1	1	0		1	1	1	1		1	1	0		1
Isophyllia_multiflora	0	1	0	0	0		1	0	1	0		0	0	0	0		0	1	0		0
Isophyllia_sinuosa	1	1	1	1	1		1	1	1	0		1	1	1	0		1	1	0		1
Mussa_angulosa	1	1	1	1	1		1	1	1	1		1	1	1	1		1	1	1		1
Mussismillia_braziliensis	0	0	0	0	0		0	0	0	0		0	0	0	0		0	0	0		1
Mussismillia_hartii	0	0	0	0	0		0	0	0	0		0	0	0	0		0	0	0		0
Mussismillia_hispida	0	0	0	0	0		0	0	0	0		0	0	0	0		0	0	0		0
Mycetophyllia_aliciae	1	1	1	0	1		1	1	1	1		0	0	1	1		1	1	0		1
Mycetophyllia_danaana	1	1	1	1	0		1	1	1	1		1	1	1	1		0	1	0		1
Mycetophyllia_ferox	1	1	1	1	1		1	1	1	1		1	0	1	1		1	1	1		1
Mycetophyllia_lamarckiana	1	1	1	1	1		1	1	1	0		1	1	1	1		1	1	0		1
Mycetophyllia_reesi	1	0	1	1	1		0	0	1	0		1	0	1	0		1	1	0		0
Scolymia_cubensis	1	1	1	1	1		1	1	1	1		1	1	1	1		1	1	1		1
Scolymia_lacera	1	1	1	1	1		1	1	1	0		1	1	1	1		1	1	0		1
Scolymia_wellsi	1	0	0	0	0		0	0	0	0		0	0	0	0		0	0	0		0
Oculina_diffusa	1	1	1	1	1		0	0	1	1		1	1	1	0		1	1	0		1
Oculina_valenciennesi	1	0	0	1	0		0	0	0	0		0	0	0	0		0	1	0		0
Oculina_robusta	0	0	1	0	0		0	0	0	0		0	0	0	0		0	1	0		0
Oculina_varicosa	1	1	0	0	0		0	0	0	0		0	0	0	0		0	1	0		0
Porites_astreoides	1	1	1	1	1		1	1	1	1		1	1	1	1		1	1	1		1
Porites_sp	1	0	1	1	0		0	0	0	0		1	0	0	0		1	1	0		1
Porites_branneri	0	0	0	0	1		1	0	1	0		0	0	0	0		0	0	0		0
Porites_colonensis	0	0	0	0	0		0	0	1	0		1	0	1	1		0	0	0		1
Porites_divaricata	1	1	1	1	1		1	1	1	1		1	1	1	1		1	1	0		1
Porites_furcata	1	1	1	1	1		1	1	1	0		0	1	1	1		1	1	0		1
Porites_porites	1	1	1	1	1		1	1	1	0		1	1	1	1		1	1	1		1
Siderastrea_radians	1	1	1	1	1		1	1	1	1		1	1	1	1		1	1	1		1
Siderastrea_siderea	1	1	1	1	1		1	1	1	1		1	1	1	1		1	1	1		1
Siderastrea_stellata	0	0	0	0	0		0	0	0	0		0	0	0	0		0	0	0		0
Caryophyllia_crypt	1	0	0	0	0		0	0	0	0		0	0	0	0		0	0	0		0
Caryophyllia_flos	0	0	0	1	0		0	0	0	0		0	0	0	0		0	0	0		0
Cladocora_debilis	1	0	0	0	0		0	0	0	0		1	0	0	0		0	0	1		0
Coenocyathus_caribbeana	1	0	0	0	0		0	0	0	0		0	0	0	0		0	0	0		0
Colangia_immersa	0	1	0	1	0		1	1	0	0		0	1	1	0		1	1	1		0
Colangia_simplex	0	1	0	1	0		0	0	0	0		0	0	0	0		0	0	0		0
Thalamophyllia__riisei	0	0	0	0	0		1	0	0	0		1	0	0	0		0	0	0		0
Phyllangia_americana	1	1	1	1	1		0	1	0	1		1	1	1	0		1	1	1		1
Phyllangia_dispersa	0	0	1	0	0		0	0	0	0		1	1	0	0		0	0	0		0
Paracyathus_defilippi	0	0	0	1	0		0	0	0	0		0	0	0	0		0	0	0		0
Paracyathus_pulchellus	0	0	0	0	0		0	0	0	0		0	0	0	0		0	0	1		0
M_memorialis	0	0	0	1	0		0	0	0	0		0	0	1	0		1	1	0		0
Desmophyllun_cristagalli	0	0	0	0	0		0	0	0	0		0	0	0	0		0	0	1		0
Polycyathus_mullerae	0	0	0	0	0		0	0	0	0		0	0	0	0		0	0	1		0
Polycyathus_senegalensis	0	0	0	0	0		0	0	0	0		0	0	0	0		0	0	1		0
Tubastraea_aurea	1	1	1	0	1		0	0	0	0		1	0	0	0		1	1	0		1
Tubastrea_tagusensis	0	0	0	0	0		0	0	0	0		0	0	0	0		0	0	0		0
Balanophyllia_floridana	0	0	0	1	0		0	0	0	0		0	0	0	0		0	0	1		0
Gardineria_minor	1	1	0	1	0		1	1	0	0		1	0	1	0		0	1	0		0
Guynia_annulata	1	0	0	1	0		0	0	0	0		0	0	0	0		0	0	0		0
Astrangia_braziliensis	0	0	0	0	0		0	0	0	0		0	0	0	0		0	0	0		0
Astrangia_rathburi	0	0	0	0	0		0	0	0	0		0	0	0	0		0	0	1		0
Astrangia_solitaria	1	1	1	1	1		1	1	0	0		1	1	1	0		1	1	1		1
Rhizosmilia_maculata	1	1	1	1	1		1	0	0	0		1	0	1	0		1	1	1		1
Millepora_alcicornis	1	1	1	1	1		1	1	1	0		1	1	1	1		1	1	0		1
Millepora_braziliensis	0	0	0	0	0		0	0	0	0		0	0	0	0		0	0	0		0
Millepora_complanata	1	1	1	1	1		1	1	1	1		1	1	1	0		1	1	0		1
Millepora_nitida	0	0	0	0	0		0	0	0	0		0	0	0	0		0	0	0		0
Millepora_laboreli	0	0	0	0	0		0	0	0	0		0	0	0	0		0	0	0		0
Millepora_squarrosa	1	1	1	0	0		1	0	1	0		1	0	1	0		0	1	0		1
Millepora_striata	0	0	0	0	0		0	0	0	0		0	0	1	0		0	0	0		0
Lepidopora_pourtalesi	1	0	0	0	0		0	0	0	0		0	0	0	0		0	0	0		1
Stylaster_roseus	1	1	1	1	1		1	1	0	0		1	1	1	0		1	1	0		1
