# Supplementary material for: Marine Biodiversity in the Caribbean: Regional Estimates and Distribution Patterns
Source: PLoS One. 2010 Aug 2;5(8):e11916. doi: 10.1371/journal.pone.0011916 (PMC2914069; doi:10.1371/journal.pone.0011916)
Supplement: Table S5 — List of polychaete (Polychaeta) species of the Caribbean and countries by ecoregion where the species have been reported. Data compiled by Judith Gobin. (0.11 MB XLS) [file pone.0011916.s005.xls]

## Sheet: por especie
Table S5. List of polychaete (Polychaeta) species of the Caribbean and countries by ecoregion where the species have been reported. Data compiled by Judith Gobin.
	Greater Antilles					Western Caribbean				Southwestern Caribbean				Southern Caribbean
SPECIES	CUBA	PUERTO RICO	HISPANIOLA	JAMAICA		MEXICO	BELIZE	HONDURAS		COLOMBIA	COSTA RICA	PANAMA		Aruba-Bonaire-Curacao	VENEZUELA	TRINIDAD & TOBAGO
Acoetes magnifica	0	0	0	1		0	0	0		0	0	0		0	0	0
Acoetes pleei	0	0	0	0		0	0	0		0	0	1		0	0	0
Aglaophamus inermis	1	0	0	0		0	0	0		0	0	0		0	0	0
Aglaophamus verrilli	0	0	0	0		0	0	0		0	0	0		0	1	1
Aglaurides diphyllidid	0	0	0	0		0	0	0		0	0	0		1	0	0
Americonuphis magna	0	0	0	0		1	1	0		0	0	0		0	0	0
Americonuphis reesei	1	0	0	0		0	0	0		0	0	0		0	0	0
Ammotrypane fimbriata	0	1	0	0		0	0	0		0	0	0		0	0	0
Amphicteis nasutus	0	1	0	0		0	0	0		0	0	0		0	0	0
Amphicteis scaphobranchiata	0	0	0	0		0	0	0		0	0	0		0	0	1
Amphiglena lindae	0	0	0	0		0	1	0		0	0	0		0	0	0
Amphinome microcarunculata	0	1	0	0		0	0	0		0	0	0		0	0	0
Amphinome rostrata	0	0	0	0		1	0	0		0	0	0		0	0	0
Ancistargis papillosa	0	0	0	0		0	0	0		0	0	0		0	0	1
Anthostoma latacapitata	0	1	0	0		0	0	0		0	0	0		0	0	0
Anthostoma ramosum	0	1	0	0		0	0	0		0	0	0		0	0	0
Aphrodita diplops	0	0	0	0		0	0	0		0	0	1		0	0	0
Apoprionospio dayi	0	0	0	0		0	0	0		0	0	0		0	0	1
Apoprionospio pygmea	0	0	0	0		0	0	0		0	0	0		0	0	1
Arabella iricolor	1	0	0	0		0	1	0		0	0	0		1	0	1
Arabella multidentata	0	0	0	0		0	0	0		0	0	1		0	0	0
Arabella mutans	0	0	0	0		0	0	0		1	0	1		0	0	0
Arabella opelina	0	1	0	0		0	0	0		0	0	0		0	0	0
Aricia cirrata	0	1	0	0		0	0	0		0	0	0		0	0	0
Aricidea acmira	0	0	0	0		0	0	0		0	0	0		0	1	0
Aricidea allia	0	0	0	0		0	0	0		0	0	0		0	1	0
Aricidea aricidea	0	0	0	0		0	0	0		0	0	0		0	1	0
Aricidea alata	0	1	0	0		0	0	0		0	0	0		0	0	0
Armandia agilis	0	0	0	0		1	0	0		0	0	0		0	0	1
Armandia brevis	0	0	0	0		1	0	0		0	0	0		0	0	0
Armandia intermedia	0	0	0	0		0	0	0		0	0	0		0	0	1
Armandia maculata	0	0	0	0		0	0	0		0	0	0		1	0	1
Armandia nonpapillata	0	0	0	1		0	0	0		0	0	0		0	0	0
Asychis elongatus	0	0	0	0		0	0	0		0	0	0		0	1	0
Autolytus dentalius	0	0	0	0		0	0	0		0	0	0		0	0	1
Autolytus fasciatus	0	0	0	0		0	0	0		0	0	0		1	0	0
Axiothella mucosa	0	0	0	0		1	1	0		0	0	0		0	0	0
Benthoscolex cubanus	1	0	0	0		0	0	0		0	0	0		0	0	0
Bhawania goodei	1	1	0	0		0	1	0		0	0	1		1	0	0
Bispira melanostigma	0	0	0	0		0	0	0		0	0	1		0	0	0
Boccardiella ligerica	0	0	0	0		0	0	0		0	0	0		1	0	0
Branchiomaldane vincenti	0	0	0	0		1	0	0		0	0	0		0	0	0
Branchiomma nigromaculata	0	0	0	1		0	0	0		0	0	0		0	0	1
Branchiosyllis exilis	0	0	0	0		0	0	0		0	0	1		0	0	0
Branchiosyllis oculata	1	0	0	0		1	0	0		0	0	0		0	0	0
Branchiosyllis pacifica	0	0	0	0		0	0	0		0	0	0		1	0	0
Brania clavata	0	0	0	0		1	0	0		0	0	0		0	0	1
Brania glandulosa	0	0	0	0		0	0	0		0	0	0		1	0	0
Brania mediodentata	0	0	0	0		0	1	0		0	0	0		0	0	0
Brania oculata	0	0	0	0		0	1	0		0	0	0		0	0	0
Brarnchiomma nigromaculata	0	0	0	0		0	0	0		1	0	0		0	0	0
Capitella capitata	0	0	0	0		0	1	0		0	0	0		0	0	1
Castalia longicirrata	0	1	0	0		0	0	0		0	0	0		0	0	0
Castalia mutilata	0	1	0	0		0	0	0		0	0	0		0	0	0
Ceratocephale oculata	0	0	0	0		0	0	0		0	0	0		0	1	1
Ceratonereis excisa	1	0	0	0		1	0	0		0	0	0		0	0	0
Ceratonereis irritabilis	1	0	0	0		0	0	0		0	0	1		0	0	0
Ceratonereis longicirrata	1	0	0	0		0	0	0		0	0	0		0	0	0
Ceratonereis mirabilis	1	1	0	0		0	0	0		0	0	0		1	0	0
Ceratonereis singularis	0	0	0	0		0	1	0		0	0	1		0	0	0
Chaetopterus variopedatus	0	0	0	0		0	0	0		1	0	0		0	0	1
Chloeia euglochis	0	1	0	0		0	0	0		0	0	0		0	0	0
Chloeia viridis	1	0	0	1		0	0	0		1	0	0		0	0	0
Chone americana	0	0	0	0		0	0	0		0	0	0		0	0	1
Chone duneri	0	0	0	0		1	1	0		1	0	0		0	0	0
Cirratulus chrsoderma	1	0	0	0		0	0	0		0	0	0		0	0	0
Cirratulus elongatus	0	1	0	0		0	0	0		0	0	0		0	0	0
Cirratulus melanacanthus	0	1	0	0		0	0	0		0	0	0		1	0	0
Cirratulus nigromaculata	0	1	0	0		0	0	0		0	0	0		0	0	0
Cirriformia dangrigae	0	0	0	0		1	0	0		0	0	0		0	0	0
Cirriformia filigera	1	0	0	0		0	0	0		0	0	0		0	0	0
Cirriformia punctata	0	0	0	0		1	0	0		0	0	0		1	0	0
Cirriformia tentaculata	1	0	0	0		0	0	0		0	0	0		0	0	0
Cirrophorus aciculatus	1	0	0	0		0	0	0		0	0	0		0	0	0
Cirrophorus branchiatus	0	0	0	0		0	0	0		0	0	0		0	1	0
Cirrophorus lyra	0	0	0	0		0	0	0		0	0	0		0	1	0
Clymene cingulata	0	1	0	0		0	0	0		0	0	0		0	0	0
Clymene cirrata	0	1	0	0		0	0	0		0	0	0		0	0	0
Clymenella torquata	0	1	0	0		0	0	0		0	0	0		0	0	0
Cossura delta	0	0	0	0		0	0	0		0	0	0		0	1	0
Cossura soyeri	0	0	0	0		0	0	0		0	0	0		0	0	1
Ctenodrilus serratus	0	0	0	0		0	0	0		0	0	0		1	0	0
Dasybranchus	0	1	0	0		0	0	0		0	0	0		0	0	0
Dasybranchus caducus	0	0	0	0		0	0	0		1	0	0		1	0	0
Dasybranchus lumbricoides	0	0	0	0		0	0	0		1	0	1		0	0	0
Dasybranchus lunulatus	0	1	0	0		0	0	0		0	0	0		0	0	0
Dasychone nigromaculata	0	0	0	0		0	0	0		0	0	0		1	0	0
Dasychone ponce	0	1	0	0		0	0	0		0	0	0		0	0	0
Decamastus gracilis	0	0	0	0		0	0	0		0	0	0		0	0	1
Demonax mircophthalmus	0	0	0	0		0	0	0		1	0	0		0	0	0
Dentatisyllis mangalis	0	0	0	0		0	1	0		0	0	0		0	0	0
Dexiospira corrugata	0	0	0	0		0	0	0		0	0	0		1	0	0
Diopatra cuprea	0	0	0	0		0	1	0		1	0	1		1	1	1
Diopatra glutinatrix	0	0	0	0		1	0	0		0	0	0		0	0	0
Diopatra neotridens	1	0	0	0		0	0	0		0	0	0		0	0	0
Diopatra splendidissima	0	0	0	0		1	0	0		0	0	0		0	0	0
Diopatra tridentata	1	1	0	0		0	0	0		0	0	0		0	1	0
Diplocirrus capensis	0	0	0	0		0	0	0		0	0	0		0	1	0
Dispio uncinata	0	0	0	0		0	0	0		0	0	0		0	0	1
Dodecaceria conharum	0	0	0	0		0	0	0		0	0	1		0	0	0
Dodecaceria coralli	0	0	0	0		0	0	0		1	0	0		0	0	0
Dorvillea Schistomeringos	0	0	0	0		0	0	0		0	0	1		0	0	0
Dorvillea bacesoui	1	0	0	0		0	0	0		0	0	0		0	0	0
Dorvillea cerasina	1	0	0	0		0	0	0		0	0	1		0	0	0
Dorvillea longidentis	0	0	0	0		1	0	0		0	0	0		0	0	0
Dorvillea rubrovittta	0	0	0	0		0	0	0		0	0	1		0	0	0
Dorvillea sociabilis	1	0	0	0		0	0	0		0	0	0		0	0	0
Ehlargileanira incises	1	0	0	0		0	0	0		0	0	0		0	0	0
Ehlersis broomensis	0	0	0	0		0	0	0		0	0	0		1	0	0
Enunice websteri	0	0	0	0		0	0	0		0	0	1		0	0	0
Eteone heteropoda	0	0	0	0		1	0	0		0	0	0		0	0	1
Eteone lactea	0	0	0	0		0	0	0		0	0	0		0	1	1
Euchone lobiferum	0	0	0	0		1	0	0		0	0	0		0	0	0
Euclymene coronata	0	0	0	0		1	0	0		0	0	0		0	0	0
Eulalia hutchinsonensis	0	0	0	0		1	0	0		0	0	0		0	0	0
Eulalia myriacycla	0	0	0	0		1	1	0		0	0	1		0	0	0
Eulalia quinquelineata	0	1	0	0		0	0	0		0	0	0		0	0	0
Eulalia viridis	0	0	0	0		0	1	0		0	0	0		0	0	0
Eulepis fimbriata	0	1	0	0		0	0	0		0	0	0		0	0	0
Eulepis splendida	0	1	0	0		0	0	0		0	0	0		0	0	0
Eulepis weberi	0	0	0	0		0	0	0		0	0	0		1	0	0
Eumida muriatica	0	0	0	0		0	1	0		0	0	0		0	0	0
Eumida sanguinea	1	0	0	0		0	0	0		0	0	0		0	0	0
Eunice	0	0	0	0		1	0	0		0	0	0		0	0	0
Eunice aedificatrix	0	0	0	0		0	0	0		0	0	1		0	0	0
Eunice afra	0	0	0	0		0	0	0		0	0	1		0	0	0
Eunice antennata	1	0	0	0		0	0	0		1	0	1		0	0	1
Eunice aphroditeis	1	0	0	0		0	0	0		0	0	1		0	0	0
Eunice cariboea	1	0	0	0		0	0	0		1	0	1		0	0	0
Eunice filamentosa	1	0	0	0		0	0	0		1	0	1		0	0	0
Eunice floridana	0	0	0	0		0	0	0		1	0	0		0	0	0
Eunice gagzoi	0	0	0	0		0	0	0		0	0	0		1	0	0
Eunice mutilata	1	0	0	0		1	0	0		1	0	0		1	0	0
Eunice ninetta	0	0	0	0		0	0	0		0	0	0		1	0	0
Eunice ornata	0	1	0	0		0	0	0		0	0	0		0	0	0
Eunice roussaei	0	0	0	0		0	0	0		0	0	0		1	0	0
Eunice rubra	0	1	0	0		0	0	0		0	0	0		1	0	0
Eunice sanguinea	0	0	0	0		1	0	0		0	0	0		0	0	0
Eunice schemacephala	1	0	0	0		0	0	0		0	0	0		0	0	0
Eunice siciliensis	0	1	0	0		0	0	0		0	0	0		1	0	0
Eunice stigmatura	0	0	0	0		0	0	0		0	0	0		1	0	0
Eunice tridentata	0	0	0	1		0	0	0		0	0	0		0	0	0
Eunice violaceomaculata	0	1	0	0		0	0	0		1	0	0		0	0	0
Eunice vittata	1	0	0	0		0	0	0		0	0	0		1	1	1
Eunice websteri	0	1	0	0		0	0	0		1	0	0		0	0	1
Euphione magnificus	0	0	0	0		0	0	0		0	0	0		1	0	0
Euphrosine triloba	1	1	0	0		0	0	0		1	0	0		0	0	0
Eupolymnia crassicornis	0	0	0	0		0	0	0		1	0	0		0	0	0
Eupolymnia nebulosa	0	0	1	0		0	0	0		0	0	1		0	0	0
Eupomatus Hydroides	0	0	0	0		0	0	0		0	0	0		0	0	1
Eupomatus alatalateralis	0	0	0	1		0	0	0		0	0	0		0	0	0
Eupomatus parvus	0	1	0	0		0	0	0		0	0	0		0	0	0
Eurysyllis tuberculata	0	0	0	0		0	1	0		0	0	0		0	0	0
Eurythoe chilensis	0	0	0	0		0	1	0		0	0	0		0	0	0
Eurythoe complanata	1	1	0	0		0	0	0		1	0	1		1	0	0
Eusyllis blomstrandi	0	0	0	0		0	1	0		0	0	0		0	0	0
Eusyllis kupferi	0	0	0	0		0	0	0		0	0	0		0	0	1
Eusyllis lamelligera	0	0	0	0		0	0	0		0	0	0		0	0	1
Exegone dispar	1	0	0	0		0	0	0		0	0	0		0	0	0
Exogone exogone	0	0	0	0		0	0	0		0	0	0		0	1	1
Exogone parexogone	0	0	0	0		0	0	0		0	0	0		0	1	0
Exogone atlantica	0	0	0	0		0	0	0		0	0	0		0	0	1
Exogone dispar	0	0	0	0		1	1	0		0	0	0		0	0	1
Exogone gemmifera	0	0	0	0		0	0	0		0	0	0		1	0	0
Exogone naidinoides	0	0	0	0		0	1	0		0	0	0		0	0	0
Exogone occidentalis	0	0	0	0		0	1	0		0	0	0		0	0	0
Fabricia infratorquata	0	0	0	0		0	1	0		0	0	0		0	0	0
Fabricia sabella	0	0	0	0		0	0	0		0	0	0		1	0	0
Fabricinuda trilobata	0	0	0	0		0	1	0		0	0	0		0	0	0
Ficopomatus miamensis	0	0	0	0		1	0	0		0	0	0		0	0	0
Fimbriosthenelais hobbsi	1	0	0	0		0	0	0		0	0	0		0	0	0
Glycera abranchiata	1	0	0	1		0	0	0		0	0	0		0	0	1
Glycera brevicrris	0	0	0	0		0	1	0		0	0	0		0	0	0
Glycera convoluta	0	0	0	0		0	0	0		0	0	0		0	0	1
Glycera dibranchiata	0	0	0	0		0	0	0		0	0	0		0	0	1
Glycera longipinnis	0	0	0	0		0	0	0		0	0	0		0	0	1
Glycera oxycephala	0	0	0	0		0	0	0		0	1	1		0	0	0
Glycera papillosa	0	0	0	0		0	0	0		0	0	0		0	1	0
Glycera sphyrabrancha	0	0	0	0		0	0	1		0	0	1		1	0	1
Glycera tesselata	1	0	0	0		1	0	0		1	0	0		1	0	0
Glycinde nordmanni	0	0	0	0		0	0	0		0	0	0		0	1	0
Glycinde solitaria	0	0	0	0		0	0	0		0	0	0		0	0	1
Goniada acicula	0	0	0	0		0	0	0		1	0	1		0	0	0
Goniada emerita	0	0	0	0		0	0	0		0	0	0		0	0	1
Goniada littorea	0	0	0	0		0	0	0		0	0	0		0	0	1
Goniada maculata	0	0	0	0		0	0	0		0	0	0		0	1	1
Goniada oculata	0	1	0	0		0	0	0		1	0	0		1	0	0
Goniada teres	1	0	0	0		0	0	0		0	0	0		0	0	0
Goniadides carolinae	0	0	0	0		0	0	0		0	0	0		0	0	1
Grubeulepis ecuadorensis	0	0	0	0		0	0	0		0	0	0		0	0	1
Grubeulepis mexicana	0	0	0	0		0	0	0		0	0	0		0	0	1
Grubeulepis sulcatisetis	1	0	0	0		0	0	0		0	0	0		0	0	0
Grubeusyllis clavata	0	0	0	0		0	0	0		0	0	0		1	0	0
Gyptis brevipalpa	0	0	0	0		0	0	0		0	0	0		0	1	1
Haploscoloplos foliosus	1	0	0	0		0	0	0		0	0	0		0	0	0
Haplosyllis spongicola	1	0	0	0		1	1	1		0	0	1		1	1	1
Harmothoe aculeata	0	0	0	0		0	1	0		0	0	0		0	0	1
Harmothoe benthophila	0	0	0	0		0	0	1		0	0	0		0	0	0
Harmothoe crusis	0	0	0	0		0	0	0		0	0	1		0	0	0
Harmothoe polytricha	0	1	0	0		0	0	0		0	0	0		1	0	0
Harmothoe roberti	0	0	0	0		0	0	0		0	0	0		1	0	0
Harmothoes cruces	0	0	0	0		0	0	0		0	0	0		1	0	0
Hemipodia pustatula	0	0	0	0		0	0	0		0	1	0		0	0	0
Hemipodus armatus	0	0	0	0		0	0	0		1	0	0		0	0	0
Hermella varians	0	1	0	0		0	0	0		0	0	0		0	0	0
Hermenia trimaculata	0	0	0	0		0	0	0		0	0	0		1	0	0
Hermenia verrucolosa	1	0	0	0		0	0	0		0	0	0		1	0	0
Hermodic carunculata	1	0	1	0		1	1	0		1	0	1		1	0	0
Hesione picta	0	0	0	0		0	0	0		0	0	0		0	0	1
Hesione intertexta	1	0	0	0		0	0	0		0	0	0		0	0	0
Hesione picta	1	0	0	1		0	0	0		0	0	1		0	0	1
Hesione proctochona	0	1	0	0		0	0	0		0	0	0		1	0	0
Hesionura coineaui	0	0	0	0		0	1	0		0	0	0		0	0	0
Hesionura elongata	0	0	0	0		0	1	0		0	0	0		0	0	0
Heteromastides bifidus	0	0	0	0		0	0	0		0	0	0		1	0	0
Heteromastus filiformis	0	0	0	0		0	0	0		1	0	0		1	0	1
Heterospio longissima	0	0	0	0		0	0	0		0	0	0		0	1	0
Hipponoe gaudichaudi	0	0	0	0		1	0	0		0	0	0		0	0	0
Hirsutonuphis geminata	0	0	0	0		0	1	0		0	0	0		0	0	0
Hyalinoecia juvenalis	0	0	0	0		0	0	0		1	0	0		0	0	0
Hydroides dirampha	0	0	0	0		0	0	0		1	0	0		0	0	0
Hydroides gairacensis	1	0	0	0		0	0	0		1	0	0		1	0	0
Hydroides parvus	0	0	0	0		0	0	0		1	0	0		1	0	0
Hypsicomatides loangoensis	0	0	0	0		0	0	0		0	0	0		1	0	0
Hypsicomatopsis circumspiciens	0	0	0	0		0	0	0		0	0	0		1	0	0
Hypsicomus phaeotenia	0	0	0	0		1	0	0		0	0	0		0	0	0
Hypsicomus torquatus	0	0	0	0		0	0	0		0	0	0		1	0	0
Isocirrus corallicolus	0	0	0	0		1	0	0		0	0	0		0	0	0
Isolda pulchella	0	0	0	0		1	0	0		0	0	1		0	1	0
Janua Dexiospira	0	0	0	0		0	1	0		0	0	0		0	0	0
Janua epichysis	0	0	0	0		0	0	0		0	0	0		1	0	0
Janua formosus	0	0	0	0		0	0	0		0	0	0		1	0	0
Janua steueri	0	0	0	0		0	0	0		0	0	0		1	0	0
Kinbergonuphis microcephala	0	0	0	0		0	1	0		0	0	0		0	0	0
Kinbergonuphis pulchra	0	0	0	0		0	1	0		0	0	0		0	0	0
Kinbergonuphis tenuis	0	0	0	0		0	0	0		0	0	0		0	1	0
Kinbergonuphis vermillionensis	0	0	0	0		0	0	0		0	0	1		0	0	0
Kinbergonuphis virgata	0	0	0	0		0	1	0		0	0	0		0	0	0
Laeonereis culveri	0	0	0	0		0	1	0		0	0	0		0	0	0
Langerhansia mexicana	1	1	0	0		0	0	0		0	0	0		0	0	0
Lanicides taboguillae	0	0	0	0		0	0	0		0	0	1		0	0	0
Laonice cirrata	1	0	0	0		0	0	0		0	0	0		0	1	0
Leitoscoloplos foliosus	0	0	0	0		0	0	0		1	0	0		0	0	0
Leitoscoloplos robustus	0	0	0	0		1	0	0		0	0	0		0	1	0
Leodora laevis	0	0	0	0		0	0	0		0	0	0		1	0	0
Lepidonopsis humilis	0	0	0	0		1	0	0		0	0	1		0	0	0
Lepidonotus inquilinus	0	0	0	0		0	0	0		0	0	0		1	0	0
Lepidonotus suleunsis	0	0	0	0		0	0	0		0	0	0		1	0	0
Lepidonotus variabilis	1	0	0	0		0	0	0		0	0	0		0	0	1
Lepidonouts sublevis	1	0	0	0		0	0	0		0	0	0		0	0	0
Levinsenia gracilis	0	0	0	0		0	0	0		0	0	0		0	1	0
Linopherus canariensis	0	0	0	0		0	0	0		0	0	1		0	0	0
Loimia medusa	0	0	0	0		0	1	0		1	0	1		0	0	1
Loimia turgida	0	0	0	0		0	0	0		0	0	0		1	0	0
Loimia viridis	0	0	0	0		0	0	0		0	0	0		0	0	1
Lopadorhynchus brevis	0	0	0	0		0	0	1		0	0	0		0	0	0
Lopadorhynchus uninatus	0	0	0	0		0	0	1		0	0	0		0	0	0
Lumbrinerides jonesi	0	0	0	0		0	0	0		0	0	0		0	1	0
Lumbrineris bilabiata	0	1	0	0		0	0	0		0	0	0		1	0	0
Lumbrineris coccinea	0	0	0	0		0	0	0		1	0	0		0	0	0
Lumbrineris ernesti	0	0	0	0		0	0	0		0	0	0		0	0	1
Lumbrineris floridana	0	1	0	0		0	0	0		0	0	0		1	0	0
Lumbrineris impatiens	0	0	0	0		0	0	0		0	0	0		0	0	0
Lumbrineris inflata	0	0	0	0		0	0	0		1	0	1		0	0	0
Lumbrineris latreilli	1	0	0	0		0	1	0		1	0	0		1	0	0
Lumbrineris parvapedata	0	1	0	0		0	0	0		0	0	0		0	0	0
Lumbrineris verrilli	0	0	0	0		0	0	0		0	0	0		0	0	1
Lycastopsis beumeri	0	0	0	0		0	0	0		0	0	0		1	0	0
Lycastopsis hummelincki	0	0	0	0		0	0	0		0	0	0		1	0	0
Lygdamis indicus	0	0	0	0		0	0	0		0	0	0		0	1	0
Lysidice collaris	1	0	0	0		0	0	0		0	0	0		0	0	0
Lysidice ninetta	1	0	0	1		0	1	0		1	0	0		0	0	0
Lysidice sulcata	0	1	0	0		0	0	0		0	0	0		0	0	0
Lysippe annectens	0	0	0	0		0	0	0		0	0	0		0	1	0
Magelona pettiboneae	0	0	0	0		0	1	0		0	0	0		0	0	1
Magelona polydentata	1	0	0	0		0	0	0		0	0	0		0	0	0
Magelona riojai	0	0	0	0		0	1	0		0	0	0		0	0	0
Malmgrenia curacaoensis	0	0	0	0		0	0	0		0	0	0		1	0	0
Marphysa aenea	0	0	0	0		0	0	0		1	0	0		0	0	0
Marphysa amadae	0	0	0	0		0	0	0		0	0	1		0	0	0
Marphysa longula	0	0	0	0		0	0	0		1	0	0		0	0	0
Marphysa macintoshi	0	0	0	0		0	0	0		0	0	0		0	0	1
Marphysa mortenseni	0	0	0	0		0	0	0		0	0	0		0	0	1
Marphysa regalis	0	0	0	0		0	0	0		1	0	0		0	0	0
Marphysa sanguinea	0	0	0	0		0	0	0		1	0	0		1	1	1
Mediomastus ambiseta	0	0	0	0		0	1	0		0	0	0		0	0	0
Mediomastus californiensis	0	0	0	0		0	0	0		0	0	0		0	1	1
Megalomma pacifica	0	0	0	0		0	0	0		1	0	0		0	0	0
Melinna cristata	0	0	0	0		0	0	0		0	0	0		0	1	1
Melinna maculata	0	0	0	0		0	0	0		0	0	0		0	0	1
Mesochaetopterus capensis	0	0	0	0		0	0	0		0	0	0		0	0	1
Mexieulepis weberi	1	0	0	0		0	0	0		0	0	0		0	0	0
Microphtalmus stocki	0	0	0	0		0	0	0		0	0	0		1	0	0
Microspio pigmentata	0	0	0	0		0	0	0		0	0	0		0	0	1
Minuspio cirrifera	0	0	0	0		1	0	0		0	0	0		0	1	0
Mooreonuphis dangrigae	0	0	0	0		1	1	0		0	0	0		0	0	0
Mystides borealis	0	0	0	0		0	1	0		0	0	0		0	0	1
Naineris laevigata	0	0	0	0		0	0	0		1	0	0		0	0	0
Naineris mutilata	1	0	0	0		0	0	0		0	0	0		0	0	0
Naineris setosa	0	0	0	0		0	1	0		0	0	0		0	0	0
Namalycastis amboinensis	0	0	0	0		0	1	0		0	0	0		0	0	0
Namalycastis macroplatis	0	0	0	0		0	0	0		0	0	1		0	0	0
Namanereis quadraticeps	0	0	0	0		1	0	0		0	0	0		0	0	0
Namaneris pontica	0	0	0	0		0	0	0		0	0	0		1	0	0
Neanthes acuminata	0	0	0	0		1	0	0		0	0	0		0	0	0
Neanthes caudata	1	0	0	0		0	0	0		0	0	0		0	0	0
Neanthes galetae	0	0	0	0		0	0	0		0	0	1		0	0	0
Neanthes micromma	0	0	0	0		0	0	0		0	0	0		0	0	1
Neanthes succinea	0	0	0	0		0	0	0		0	0	1		1	0	0
Nematonereis unicornis	1	0	0	0		0	0	0		0	0	1		0	0	0
Nephtys incisa	0	0	0	0		0	0	0		0	0	0		0	1	0
Nephtys magellanica	0	0	0	0		0	0	0		1	0	0		0	0	0
Nephtys phyllocirra	0	0	0	0		0	0	0		1	0	0		1	0	0
Nephtys squamosa	1	1	0	0		0	0	0		1	0	0		0	0	0
Nereiphylla castanea	0	0	0	0		1	0	0		0	0	0		0	0	0
Nereiphylla mimica	0	0	0	0		0	1	0		0	0	0		0	0	0
Nereiphylla sanguinea	0	0	0	0		1	0	0		0	0	0		0	0	0
Nereis Neanthes	0	0	0	0		0	0	0		0	0	0		0	0	1
Nereis arroyensis	0	1	0	0		0	0	0		0	0	0		0	0	0
Nereis bairdii	0	1	0	0		0	0	0		0	0	0		0	0	0
Nereis callaona	0	0	0	0		0	0	0		0	0	1		0	0	0
Nereis diversicolor	1	0	0	0		0	0	0		0	0	0		0	0	0
Nereis falsa	0	0	0	0		0	0	0		0	0	0		0	1	0
Nereis goajirana	0	0	0	0		0	0	0		0	0	0		1	0	0
Nereis jacksoni	1	0	0	0		0	0	0		0	0	0		0	0	0
Nereis panamensis	0	0	0	0		0	0	0		0	0	1		0	0	0
Nereis pelagica	0	0	0	0		0	0	0		0	0	0		0	1	1
Nereis riisei	1	0	0	0		0	0	0		0	0	1		0	0	0
Nereis trifasciata	0	0	0	0		0	0	1		0	0	0		0	0	0
Nerinides goodbodyi	0	0	0	1		0	0	0		0	0	0		0	0	0
Nicidion brevis	0	1	0	0		0	0	0		0	0	0		1	0	0
Nicolea bilobata	0	0	0	0		0	0	0		0	0	0		1	0	0
Nicomache antillensis	0	0	0	1		0	1	0		0	0	0		1	0	0
Notaulax nudicollis	0	0	0	0		0	0	0		1	0	0		0	0	0
Notaulax occidentalis	0	0	0	0		0	1	0		1	0	1		0	0	0
Nothria conchylega	1	0	0	0		0	0	0		1	0	0		0	0	0
Notomastus	0	0	0	0		1	0	0		0	0	0		0	0	0
Notomastus americanus	0	0	0	0		0	0	0		0	0	0		0	1	0
Notomastus angelicae	0	0	0	0		0	0	0		0	0	0		0	1	0
Notomastus daueri	0	0	0	0		0	0	0		0	0	0		0	1	0
Notomastus hemipodus	0	0	0	0		0	0	0		0	0	0		0	0	1
Notomastus latericeus	0	0	0	0		0	1	0		0	0	0		0	0	0
Notomastus lineatus	0	0	0	0		0	0	0		0	0	1		0	1	0
Notomastus lobatus	0	0	0	0		0	0	0		0	0	0		0	0	1
Notomastus tenuis	0	0	0	0		0	0	0		0	0	0		0	1	1
Notopygos crinite	0	1	0	0		0	0	0		1	0	0		0	0	0
Odontosyllis luminosa	0	0	0	0		0	1	0		0	0	0		0	0	0
Odontosyllis twincayensis	0	0	0	0		0	1	0		0	0	0		0	0	0
Oenone fulgida	1	0	0	0		0	0	0		0	0	1		1	0	0
Ophelina acuminata	0	0	0	0		0	0	0		0	0	0		0	1	0
Ophelina cylindricaudata	0	0	0	0		0	0	0		0	0	0		0	1	0
Ophelina hachaensis	0	0	0	0		0	0	0		0	0	0		1	0	0
Opisthosyllis brunnea	0	0	0	0		0	0	0		0	0	1		1	0	0
Opisthosyllis nuchalis	0	0	0	0		0	1	0		0	0	0		0	0	0
Opitsthosyllis brunnea	1	0	0	0		0	0	0		0	0	0		0	0	0
Oriopsis androgyne	0	0	0	0		0	1	0		0	0	0		0	0	0
Owenia fusiformis	0	0	0	0		0	0	0		0	0	1		0	0	0
Paleanotus debilis	1	0	0	0		0	0	0		0	0	0		0	0	0
Palola sicilensis	1	0	0	0		0	1	0		0	0	1		0	0	0
Panthalis ocilea	0	1	0	0		0	0	0		0	0	0		0	0	0
Paraeupolymnia carus	0	0	0	0		0	1	0		0	0	0		0	0	0
Paramphinome besnardi	0	0	0	0		0	0	0		0	0	0		0	1	0
Paranaitis speciosa	1	0	0	0		0	0	0		0	0	0		0	0	0
Parandalia americana	0	0	0	0		0	1	0		0	0	0		0	0	1
Paraonella nordica	0	0	0	0		1	0	0		0	0	0		0	1	0
Paraonis fulgens	1	0	0	0		0	0	0		0	0	0		0	0	0
Paraonis gracilis	1	0	0	0		0	0	0		0	0	0		0	0	0
Parapionosyllis longicirrata	0	0	0	0		0	1	0		0	0	0		0	0	0
Paraprionospio pinnata	0	0	0	0		1	0	0		0	0	0		0	1	1
Pareulepis sulcatisetis	0	0	0	1		0	0	0		0	0	0		0	0	0
Pareurythoe americana	0	0	0	0		0	0	0		1	0	0		0	0	0
Pectinaria gouldi	0	1	0	0		0	0	0		0	0	0		0	0	0
Perinereis andersoni	1	0	0	0		0	0	0		0	0	0		0	0	0
Perkinsiana fonticula	0	0	0	0		0	0	0		0	0	1		0	0	0
Pettibonella multiuncinata	0	0	0	0		0	1	0		0	0	0		0	0	0
Pherusa eruca	1	0	0	0		0	0	0		0	0	0		0	0	0
Pherusa inflata	0	0	0	0		0	0	0		0	0	1		0	0	0
Pherusa parmata	0	0	0	0		0	0	0		1	0	0		0	0	0
Pherusa plumosa	0	0	0	0		0	0	0		1	0	0		0	0	0
Phllochaetopterus claparedia	0	0	0	0		0	0	0		0	0	0		1	0	0
Phylllodoce panamensis	0	0	0	0		0	1	0		0	0	0		0	0	1
Phyllochaetopterus clapredi	0	1	0	0		0	0	0		0	0	0		0	0	0
Phyllodoce arenae	0	0	0	0		0	0	0		0	0	0		0	0	1
Phyllodoce erythrophylla	0	0	0	0		0	1	0		0	0	1		0	0	0
Phyllodoce fide	0	0	0	0		0	0	0		0	0	0		1	0	0
Phyllodoce madeirensis	0	0	0	0		0	0	0		0	0	1		0	0	1
Phyllodoce magnaoculata	0	1	0	0		0	0	0		0	0	0		0	0	0
Phyllodoce oculata	0	1	0	0		0	0	0		0	0	0		0	0	0
Pileolaria quaimilitaris	0	0	0	0		0	0	0		0	0	0		1	0	0
Pionosyllis weissmanni	0	0	0	0		0	0	0		0	0	0		0	1	1
Pisionidens indica	0	0	0	0		0	0	0		0	1	0		0	0	0
Pista cristata	0	0	0	0		0	1	1		1	0	0		0	0	0
Pista fasciata	0	0	0	0		0	0	0		0	0	1		0	0	0
Pista palmata	0	0	0	0		0	0	0		1	0	0		0	0	0
Plakosyllis quadrioculata	0	0	0	0		0	1	0		0	0	0		0	0	0
Platynereis dumerilii	1	0	0	0		1	1	0		0	0	1		1	0	1
Podarke agilis	0	1	0	0		0	0	0		0	0	0		0	0	0
Podarke obscura	0	0	0	0		0	0	0		0	0	1		1	0	0
Poecilochaetus johnsoni	0	0	0	0		0	0	0		0	0	0		1	1	0
Polycirrus purpureus	0	0	0	0		0	0	0		1	0	0		1	0	0
Polydontes frons	1	0	0	0		0	0	0		0	0	0		0	0	0
Polydora ancistrata	0	0	0	1		0	0	0		0	0	0		0	0	0
Polydora cornuta	0	0	0	0		0	1	0		0	0	0		0	0	0
Polydora plena	0	0	0	0		0	0	0		0	0	0		0	0	1
Polydora socialis	0	0	0	0		0	0	0		0	0	0		0	0	1
Polydora websteri	0	0	0	0		0	0	0		1	0	0		0	0	0
Polynoe branchiata	0	1	0	0		0	0	0		0	0	0		0	0	0
Polynoe brevitosa	0	1	0	0		0	0	0		0	0	0		0	0	0
Polynoe nodosa	0	1	0	0		0	0	0		0	0	0		0	0	0
Polyodontes oculea	0	0	0	1		0	0	0		0	0	0		0	0	0
Polyophthalmus pictus	0	0	0	0		1	1	0		0	0	0		1	0	0
Polyopthalmus floridanus	0	0	0	0		0	0	0		0	0	0		1	0	0
Pomatoceros caerulescens	0	0	0	0		0	0	0		0	0	0		1	0	0
Pomatostegus stellatus	1	1	1	0		1	0	0		1	0	0		1	0	0
Praxillella praetermissa	0	0	0	0		0	0	0		0	0	0		1	0	0
Prionospio minuspio	0	0	0	0		0	0	0		0	0	0		0	1	0
Prionospio prionospio	0	0	0	0		0	0	0		0	0	0		0	1	1
Prionospio cirrobranchiata	1	0	0	0		0	0	0		0	0	0		0	0	1
Prionospio cristata	0	0	0	0		0	0	0		0	0	0		0	0	1
Prionospio fallax	0	0	0	0		0	0	0		0	0	0		0	0	1
Prionospio heterobranchia	0	0	0	0		0	1	0		0	0	1		0	0	1
Protoaricia pigmentata	0	0	0	0		0	1	0		0	0	0		0	0	0
Protodorvillea kefersteini	0	0	0	0		0	1	0		0	0	0		0	1	0
Protulides elegans	0	1	0	0		0	0	0		0	0	0		0	0	0
Psammolyce arenosa	1	0	0	0		0	0	0		0	0	0		1	0	0
Psammolyce espinosa	1	0	0	0		0	0	0		0	0	0		0	0	0
Psammolyce rigida	0	1	0	0		0	0	0		0	0	0		0	0	0
Psammolyce spinosa	0	0	0	0		0	0	0		0	0	1		0	0	0
Pseudobranchiomma emersoni	0	0	0	1		0	0	0		0	0	0		0	0	0
Pseudobrania clavata	0	0	0	0		0	1	0		0	0	0		0	0	0
Pseudofabricioloa quasincisura	0	0	0	0		0	1	0		0	0	0		0	0	0
Pseudonereis gallapagensis	1	0	0	0		1	0	0		0	0	0		0	0	0
Pseudonereis variegata	0	0	0	0		0	0	0		0	0	1		1	0	0
Pseudopotamilla reniformis	0	0	0	0		0	0	0		0	0	1		0	0	0
Pseudosyllides curacaoensis	0	0	0	0		0	0	0		0	0	0		1	0	0
Pseudovemicularia fuscostriata	0	0	0	0		0	0	0		0	0	0		1	0	0
Pseudovemicularia holcopleura	0	0	0	0		0	0	0		0	0	0		1	0	0
Pseudovemicularia madraciola	0	0	0	0		0	0	0		0	0	0		1	0	0
Pseudovemicularia multispinosa	0	0	0	0		0	0	0		0	0	0		1	0	0
Pterocirrus foliosus	0	0	0	0		0	1	0		0	0	0		0	0	0
Rhynchonerella moebii	0	0	0	0		0	0	1		0	0	0		0	0	0
Rullierinereis mexicana	0	0	0	0		1	0	0		0	0	0		0	0	0
Sabaco elongatus	0	0	0	0		0	1	0		0	0	0		0	0	0
Sabella bahamensis	0	0	0	0		0	0	0		1	0	0		1	0	0
Sabella melanostigma	0	0	0	1		1	1	0		1	0	0		0	1	1
Sabellaria floridensis	0	0	0	0		0	0	0		1	0	1		0	0	0
Sabellastarte magnifica	0	0	1	1		1	0	0		1	0	0		1	0	0
Saccocirrus major	0	0	0	0		0	0	0		0	0	0		1	0	0
Salmacina incrustans	0	0	0	0		0	0	0		1	0	0		1	0	0
Schistomeringos pectinata	0	0	0	0		0	0	0		0	0	0		0	1	1
Schistomeringos rudophi	1	0	0	0		0	0	0		0	0	0		0	0	0
Sclerostyla ctenactis	0	0	0	0		0	0	0		1	0	1		0	0	0
Scolelepis squamata	1	0	0	0		1	0	0		1	0	1		0	1	0
Scoletoma tetraura	0	0	0	0		0	1	0		0	0	0		0	0	0
Scoloplos capensis	0	0	0	0		0	0	0		0	0	0		0	0	1
Scoloplos laevigata	0	0	0	0		0	0	0		0	0	0		1	0	0
Scoloplos rubra	1	0	0	0		0	0	0		0	0	0		0	1	1
Scoloplos texana	0	0	0	0		0	0	0		0	0	0		0	1	1
Scoloplos treadwelli	0	0	0	0		0	0	0		1	0	0		1	0	0
Sigalion arenicola	1	0	0	0		0	1	0		0	0	0		0	0	0
Sigambra bassi	0	0	0	0		0	0	0		0	0	0		0	0	1
Sigambra tentaculata	1	0	0	0		0	0	0		0	0	0		0	1	1
Sige belizensis	0	0	0	0		0	1	0		0	0	0		0	0	0
Siphonostomum caribou	0	1	0	0		0	0	0		0	0	0		0	0	0
Sphaeorosyllis longicauda	0	0	0	0		0	0	0		0	0	0		0	0	1
Sphaerosyllis belizensis	0	0	0	0		0	1	0		0	0	0		0	0	0
Sphaerosyllis bilobata	0	0	0	0		0	1	0		0	0	0		0	0	0
Sphaerosyllis centroamericana	0	0	0	0		0	0	0		0	0	0		1	0	0
Sphaerosyllis erinaceus	0	0	0	0		0	0	0		0	0	0		1	0	0
Sphaerosyllis longilamina	0	0	0	0		0	1	0		0	0	0		0	0	0
Sphaerosyllis magnidentata	0	0	0	0		0	0	0		0	0	0		0	1	0
Sphaerosyllis parvoculata	0	0	0	0		0	1	0		0	0	0		0	0	0
Sphaerosyllis pirifera	0	0	0	0		0	1	0		0	0	0		1	0	0
Spio pettiboneae	0	0	0	0		0	0	0		0	0	0		1	1	1
Spiochaetopterus costarum	0	0	0	0		0	1	0		0	0	0		1	0	0
Spiochaetopterus oculatus	0	0	0	0		0	0	0		0	0	0		1	0	1
Spiophanes missionensis	0	0	0	0		0	0	0		0	0	0		1	1	1
Spiophanes wigleyi	0	0	0	0		0	0	0		0	0	0		1	1	1
Spirobranchus dendropomaMorch	0	0	0	0		0	0	0		0	0	0		1	0	0
Spirobranchus gigantus	0	0	1	0		0	0	0		1	0	0		1	0	0
Spirobranchus tetraceros	0	0	0	0		0	0	0		1	0	0		0	0	0
Spirorbis antillarum	0	0	0	0		0	0	0		0	0	0		1	0	0
Spirorbis koehleri	0	0	0	0		0	0	0		0	0	0		1	0	0
Stauronereis angolana	0	0	0	0		0	0	0		0	0	0		1	0	0
Stauronereis melanops	0	0	0	0		0	0	0		0	0	0		1	0	0
Stauronereis rubra	0	0	0	0		0	0	0		0	0	0		1	0	0
Sternaspis scutata	0	0	0	0		0	0	0		0	0	0		0	0	1
Sthenelais articulate	1	0	0	0		0	0	0		0	0	0		0	0	0
Sthenelais boa	0	0	0	0		0	0	0		0	0	0		1	0	0
Sthenelais grubei	0	1	0	0		0	0	0		0	0	0		0	0	0
Sthenelais kukenthali	0	0	0	0		0	0	0		0	0	0		0	0	0
Sthenelais simplex	0	1	0	0		0	0	0		0	0	0		0	0	0
Sthenolepis gracilior	0	0	0	0		0	0	0		0	0	0		1	0	0
Sthenolepis kukenthali	0	0	0	0		0	0	0		0	0	0		1	0	0
Streblosoma bairdi	0	0	0	0		0	0	0		1	0	0		0	0	0
Streblosoma crassibranchia	0	0	0	0		0	0	0		0	0	1		0	0	0
Streblosoma hartmanae	0	0	0	0		0	0	0		0	0	0		0	1	0
Streblospio benedicti	0	0	0	0		0	0	0		1	0	0		0	0	1
Stylaroides glabra	0	1	0	0		0	0	0		0	0	0		0	0	0
Syllis complanata	0	1	0	0		0	0	0		0	0	0		0	0	0
Syllis gracilis	0	0	0	0		0	0	0		0	0	0		0	0	1
Syllis ortiziSan	0	0	0	0		0	0	0		0	0	0		0	1	0
Syllis prolifera	0	0	0	0		0	0	0		0	0	0		0	0	1
Syllis spongicola	0	0	1	0		0	0	0		0	0	0		0	1	0
Synelmis albini	0	0	0	0		0	1	0		0	0	0		0	0	0
Taylorpholoe hirsuta	0	0	0	0		0	1	0		0	0	0		0	0	0
Terebella annulifis	0	1	0	0		0	0	0		0	0	0		0	0	0
Terebella lapridia	0	0	0	0		0	0	0		0	0	0		1	0	0
Terebella pterochaeta	0	0	0	0		0	0	0		1	0	0		0	0	0
Terebella reticulate	0	0	0	0		0	0	0		0	0	0		1	0	0
Terebella rubra	0	0	0	0		0	0	0		1	0	0		0	0	0
Terebella turgidula	0	1	0	0		0	0	0		0	0	0		0	0	0
Terebella variegata	0	1	0	0		0	0	0		0	0	0		0	0	0
Terebellides parvus	0	0	0	0		0	1	0		0	0	0		0	0	0
Terebellides stroemi	0	0	0	0		1	0	0		1	0	0		1	1	1
Thalanessa lewesii	1	0	0	0		0	0	0		0	0	0		0	0	0
Tharyx annulosus	0	0	0	0		0	0	0		0	0	0		0	1	1
Tharyx marioni	0	0	0	0		0	0	0		0	0	0		0	0	1
Thelepus crassibranchiatus	0	1	0	0		0	0	0		0	0	0		0	0	0
Thelepus pascua	0	0	0	0		0	1	0		0	0	1		0	0	0
Thelepus setosus	0	0	0	0		0	1	0		1	0	1		1	0	0
Theostoma oerstedi	0	0	0	0		0	0	0		0	0	0		1	0	0
Timarete filigera	0	0	0	0		0	0	0		1	0	0		0	0	0
Tomopteris ketersteini	0	0	0	0		0	0	1		0	0	0		0	0	0
Trichobranchus glacialis	0	0	0	0		0	1	0		0	0	0		0	0	0
Trypanosyllis zebra	1	0	0	0		0	0	0		0	0	0		0	0	0
Typosyllis aciculata	0	0	0	0		0	0	0		0	0	1		0	0	0
Typosyllis amica	0	0	0	0		1	0	0		0	0	0		0	0	0
Typosyllis anops	0	0	0	0		0	0	0		0	0	1		0	0	0
Typosyllis armillaris	1	0	0	0		0	0	0		0	0	1		0	0	0
Typosyllis bifurcata	0	0	0	0		0	0	0		0	0	0		1	0	0
Typosyllis brachychaeta	0	0	0	0		0	1	0		0	0	0		1	0	0
Typosyllis corallicola	0	0	0	1		0	0	1		0	0	1		0	0	0
Typosyllis corallicoloides	0	0	0	0		0	0	0		0	0	0		1	0	0
Typosyllis cornuta	0	0	0	0		0	1	0		0	0	1		0	0	0
Typosyllis fasciata	1	0	0	0		0	0	0		0	0	0		0	0	0
Typosyllis fuscosuturata	0	0	0	0		0	0	0		0	0	0		1	0	0
Typosyllis gracilis	0	0	0	0		0	0	0		0	0	0		1	0	0
Typosyllis hyalina	0	0	0	0		0	1	0		0	0	0		0	0	0
Typosyllis prolifera	1	0	0	0		0	0	0		0	0	0		0	0	0
Typosyllis sexoculata	0	0	0	0		0	0	0		0	0	0		1	0	0
Typosyllis tigrinoides	0	0	0	0		0	0	0		0	0	0		1	0	0
Typosyllis tortugaensis	0	0	0	0		0	0	0		0	0	0		1	0	0
Typosyllis variegata	1	0	0	0		0	0	0		0	0	1		1	0	0
Vermiliopsis annulata	0	1	0	0		0	1	0		1	0	0		1	0	0
Vermiliopsis glandigera	0	0	0	0		0	1	0		0	0	0		0	0	0
