# Supplementary material for: Marine Biodiversity in the Caribbean: Regional Estimates and Distribution Patterns
Source: PLoS One. 2010 Aug 2;5(8):e11916. doi: 10.1371/journal.pone.0011916 (PMC2914069; doi:10.1371/journal.pone.0011916)
Supplement: Table S7 — List of amphipod (Amphipoda) species of the Caribbean and countries by ecoregion where the species have been reported. (0.08 MB XLS) [file pone.0011916.s007.xls]

## Sheet: Sheet1
Table S7. List of amphipod (Amphipoda) species of the Caribbean and countries by ecoregion where the species have been reported.
	Greater Antilles				Western Caribbean			Southwestern Caribbean				Southern Caribbean			Eastern Caribbean
Species	CUBA	PUERTO RICO	HISPANIOLA		MEXICO	BELIZE		COSTA RICA	PANAMA	COLOMBIA		VENEZUELA	Aruba-Bonaire-Curacao		LESSER ANTILLES
Actogidiella_cultrifera	0	0	0		0	0		0	0	0		0	0		1
Acuminodeutopus_naglei	0	0	0		0	0		0	0	0		0	0		0
Aeginella_spinosa	1	0	0		0	0		0	0	0		0	0		0
Alloweckelia_gurneei	0	1	0		0	0		0	0	0		0	0		0
Americhelidium_americanum	0	0	0		1	1		0	0	0		1	0		0
Americorophium_rioplatense	0	0	0		0	0		0	0	0		1	0		0
Ameroculodes_edwardsi	0	0	0		0	0		0	0	0		1	0		0
Ampelisca_abdita	0	0	0		1	0		0	0	0		0	0		0
Ampelisca_abyssicola	0	1	0		0	0		0	0	0		0	0		0
Ampelisca_agassizi	0	0	0		1	0		0	0	0		0	0		0
Ampelisca_bicarinata	0	0	0		1	0		0	0	0		1	0		0
Ampelisca_brevisimulata	0	0	0		1	0		0	0	1		1	0		0
Ampelisca_burkei	1	0	0		1	0		0	0	0		1	0		0
Ampelisca_cristata_cristata	1	0	0		1	0		1	0	1		1	0		0
Ampelisca_cristata_microdentata	1	0	0		0	0		1	0	1		1	1		0
Ampelisca_cristoides	0	0	0		0	0		0	0	1		1	0		0
Ampelisca_holmesi	1	0	0		1	0		0	0	1		1	0		0
Ampelisca_lobata	1	0	0		1	0		1	1	1		1	1		0
Ampelisca_mexicana	0	0	0		0	0		1	1	0		0	0		0
Ampelisca_pacifica	1	0	0		0	0		0	1	0		0	0		0
Ampelisca_parapacifica	0	0	0		1	0		0	0	0		1	0		0
Ampelisca_parapanamensis	0	0	0		0	0		0	0	1		1	0		0
Ampelisca_paria	0	0	0		0	0		0	0	0		1	0		0
Ampelisca_pugetica	0	0	0		0	0		0	0	1		1	1		0
Ampelisca_romigi	0	0	0		0	0		0	1	1		0	1		0
Ampelisca_schellenbergi	1	0	0		1	0		0	1	1		1	0		0
Ampelisca_spinipes	0	0	0		0	0		1	0	0		0	0		0
Ampelisca_vadorum	0	0	0		1	0		0	0	0		0	0		0
Ampelisca_venetiensis	0	0	0		0	0		1	0	1		0	0		0
Ampelisca_vera	0	0	0		0	0		0	1	1		0	0		0
Ampelisca_verrilli	0	0	0		1	0		0	0	0		0	0		0
Ampelisciphotis_podophthalma	0	0	0		0	0		0	0	0		1	0		0
Amphideutopus_dolicocephalus	0	0	0		0	0		0	0	0		1	0		0
Amphilochus_ascidicola	0	0	0		0	0		0	0	0		1	0		0
Amphilochus_casahoya	0	0	0		1	0		0	0	0		1	0		0
Amphilochus_delacaya	0	0	0		1	0		0	0	0		0	0		0
Amphilochus_neapolitanus	1	0	0		1	0		0	0	0		1	0		0
Amphilochus_pillai	0	0	0		0	0		0	0	0		0	0		0
Ampithoe_hirsutimanus	0	0	0		0	0		0	0	0		0	0		0
Ampithoe_longimana	0	0	0		0	0		0	0	0		1	0		0
Ampithoe_marcuzzii	1	1	0		1	1		1	0	1		1	0		0
Ampithoe_pollex	0	0	0		0	0		0	0	0		1	0		0
Ampithoe_ramondi	1	0	0		1	0		0	0	1		1	0		0
Ampithoe_valida	0	0	0		0	0		0	0	0		1	0		0
Anamaera_hixoni	0	0	0		0	0		0	0	0		1	0		0
Anamixis_cavatura	1	0	0		1	0		0	0	0		1	0		0
Anamixis_cavatura_morfo_Leucothoides	0	0	0		0	0		0	0	0		1	0		0
Anamixis_hanseni	1	0	0		0	1		0	0	1		1	0		0
Anamixis_vanga	0	0	0		1	1		0	0	0		1	0		0
Anelasmopus_kraui	0	0	0		0	0		0	0	0		1	0		0
Apocorophium_acutum	1	0	0		0	0		0	0	0		1	0		0
Apocorophium_lacustre	0	0	0		0	0		0	0	0		1	0		0
Apocorophium_louisianum	0	0	0		1	0		0	0	0		1	0		0
Apocorophium_simile	0	0	0		1	0		0	0	0		1	0		0
Apoweckelia_serrata	0	0	1		0	0		0	0	0		0	0		0
Argissa_hamatipes	0	0	0		1	0		0	0	0		0	0		0
Aristias_captiva	0	0	0		0	0		0	0	0		1	0		0
Audulla_chelifera	1	0	0		1	0		0	0	0		1	0		0
Bahadzia_jaraquensis	0	0	1		0	0		0	0	0		0	0		0
Bahadzia_latipalpus	0	0	1		0	0		0	0	0		0	0		0
Bahadzia_yagerae	1	0	0		0	0		0	0	0		0	0		0
Batea_bousfieldi	1	0	0		0	0		0	0	0		0	0		0
Batea_campi	1	0	0		0	0		0	0	0		1	0		0
Batea_carinata	1	0	0		1	0		0	0	1		1	0		0
Batea_catharinensis	1	0	0		1	0		0	0	0		0	0		0
Batea_cuspidata	1	0	0		1	0		0	0	1		1	0		1
Batea_schotti	0	0	0		0	0		0	0	1		0	0		0
Batea_transversa	1	0	0		0	0		0	0	0		0	0		0
Bemlos_barnardi	1	0	0		0	0		0	0	0		0	0		0
Bemlos_brunneomaculatus_brunneomaculatus	0	0	0		0	0		0	0	0		1	0		0
Bemlos_dentischium	1	0	0		0	0		0	0	0		1	0		0
Bemlos_foresti	0	0	0		0	0		0	0	1		1	0		0
Bemlos_habanensis	1	0	0		0	0		0	0	0		0	0		0
Bemlos_kunkelae	1	0	0		1	0		0	0	0		1	0		0
Bemlos_longicornis	0	1	0		1	0		0	0	1		0	0		0
Bemlos_macromanus	0	0	0		0	0		0	0	0		1	0		0
Bemlos_mayensis	1	0	0		0	0		0	0	0		0	0		0
Bemlos_rectangulatus	1	0	0		0	0		0	0	1		0	0		0
Bemlos_rolani	1	0	0		0	0		0	0	0		0	0		0
Bemlos_sanmartini	1	0	0		0	0		0	0	0		0	0		0
Bemlos_scolosternum	0	0	0		0	0		0	0	1		0	0		0
Bemlos_spinicarpus_inermis	1	0	0		1	0		0	0	0		0	0		0
Bemlos_spinicarpus_spinicarpus	1	1	0		1	0		0	0	0		1	0		0
Bemlos_unicornis	1	0	0		1	0		0	0	0		1	0		0
Bemlos_unifasciatus_reductus	0	1	0		0	0		0	0	1		0	0		0
Bemlos_unifasciatus_unifasciatus	0	1	0		1	0		0	0	0		1	0		0
Biancolina_lowryi	1	0	0		0	0		0	0	0		0	0		0
Boca_campi	0	0	0		0	0		0	0	0		1	0		0
Bogidiella_perla_	0	0	0		0	0		0	0	0		1	0		0
Bogidiella_virginalis	0	0	0		0	0		0	0	0		0	0		1
Bonassa_bonairensis	0	0	0		0	0		0	0	0		0	1		0
Bruzelia_pericu	0	0	0		0	0		0	1	0		0	0		0
Bruzeliopsis_turba	0	0	0		0	0		0	1	0		0	0		0
Byblis_cubensis	1	0	0		0	0		0	0	0		0	0		0
Byblisoides_blasensis	0	0	0		0	0		0	1	0		0	0		0
Caprella_andreae	1	0	0		1	0		0	0	0		0	0		0
Caprella_danilevskii	0	0	0		1	0		0	0	1		1	0		0
Caprella_equilibra	0	0	0		1	0		0	0	0		1	0		0
Caprella_penantis	0	0	0		1	0		0	0	1		1	0		0
Caprella_scaura	0	0	0		1	0		0	0	0		0	0		0
Caribboecetes_barbadensis	0	0	0		0	0		0	0	0		1	0		0
Caribboecetes_crassicornis	0	0	0		0	0		0	0	0		0	0		1
Caribboecetes_intermedius	0	0	0		0	0		0	0	0		1	0		0
Caribboecetes_justi	0	0	0		0	0		0	0	1		0	0		0
Caribboecetes_pterycornis	0	0	0		0	0		0	0	0		1	0		0
Caribeseba_tropica	0	0	0		1	1		0	0	0		1	0		0
Cebocaris_grutesca	0	1	0		0	0		0	0	0		0	0		0
Ceradocus_rubromaculatus	0	0	0		0	0		0	0	0		1	0		0
Ceradocus_sheardi	1	0	0		1	0		0	0	0		1	0		0
Ceradocus_shoemakeri	1	0	0		1	0		0	0	1		1	0		0
Cerapus_benthophilus	0	0	0		1	0		0	0	0		1	0		0
Cerapus_cudjoe	0	0	0		1	0		0	0	0		1	0		0
Cerapus_orteai	0	0	0		0	0		1	0	0		0	0		0
Cerapus_thomasi	0	0	0		0	0		0	0	0		1	0		0
Cerapus_tubularis	1	0	0		1	0		0	0	0		0	0		0
Chelorchestia_costaricana	0	0	0		0	0		1	0	0		0	0		1
Chevalia_aviculae	1	0	0		1	0		0	0	1		0	0		0
Chevalia_carpenteri	0	0	0		1	1		0	0	0		0	0		0
Chevalia_mexicana	1	0	0		1	1		0	0	0		1	0		1
Colomastix_bousfieldi	1	0	0		1	0		0	0	0		1	0		0
Colomastix_camura	0	0	0		1	0		0	0	0		1	0		0
Colomastix_gibbosa	0	0	0		0	0		0	0	0		0	0		1
Colomastix_halichondriae	1	0	0		0	0		0	0	0		0	1		0
Colomastix_heardi	1	0	0		0	0		0	0	0		1	0		0
Colomastix_ircinae	0	0	0		1	0		0	0	0		0	0		0
Colomastix_janiceae	0	0	0		1	0		0	0	1		0	0		0
Colomastix_pusilla	1	0	0		0	0		0	0	1		1	0		0
Colomastix_tridentata	1	0	0		1	0		0	0	0		1	0		0
Concarnes_concavus	0	0	0		1	1		1	1	0		0	0		0
Confodiopisa_caesicola	0	0	0		0	0		0	0	0		0	1		0
Confodiopisa_scopulorum	0	0	0		0	0		0	0	0		1	0		0
Corocubanus_guitarti	1	0	0		0	0		0	0	0		0	0		0
Crangoweckelia_mixta	0	0	1		0	0		0	0	0		0	0		0
Crangoweckelia_spinicauda	0	0	1		0	0		0	0	0		0	0		0
Crassicorophium_bonellii	1	0	0		0	0		0	0	0		0	0		0
Curidia_debrogania	0	0	0		1	1		0	0	0		0	0		0
Cyamus_boopis	1	0	0		0	0		0	0	0		0	0		0
Cymadusa_compta	1	0	0		1	0		0	0	0		0	0		0
Cymadusa_filosa	1	0	0		1	0		0	0	0		1	0		0
Cyphocaris_anonyx	1	0	0		0	0		0	0	0		0	0		0
Cyphocaris_johnsoni	0	1	0		0	0		0	0	0		1	0		0
Deflexilodes_intermedius	0	0	0		0	0		0	0	0		1	0		0
Deutella_californica	0	0	0		1	0		0	0	0		0	0		0
Deutella_caribensis	0	0	0		0	0		0	0	1		0	0		0
Deutella_incerta	1	0	0		1	0		0	0	1		1	0		0
Deutella_margaritae	0	0	0		0	0		0	0	0		1	0		0
Deutella_mayeri	1	0	0		0	0		0	0	1		0	0		0
Dulichiella_appendiculata	1	0	0		1	0		1	0	0		1	0		0
Dumosus_atari	0	0	0		1	1		0	0	0		1	0		0
Eclecticus_eclecticus	0	0	0		0	0		0	1	0		0	0		0
Elasmopus_balkomanus	0	0	0		0	0		0	0	1		1	0		0
Elasmopus_bampo	0	0	0		0	0		0	0	0		1	0		0
Elasmopus_brasiliensis	0	0	0		0	0		0	0	1		0	0		0
Elasmopus_elieri	0	0	0		0	0		0	0	0		1	0		0
Elasmopus_lemaitre	1	0	0		0	0		0	0	0		0	0		0
Elasmopus_levis	0	0	0		1	0		0	0	0		1	0		0
Elasmopus_pectenicrus	1	0	0		1	0		0	0	0		1	0		1
Elasmopus_pocillimanus	1	0	0		1	0		0	0	0		1	0		1
Elasmopus_rapax	1	0	0		1	0		0	0	0		1	0		1
Elasmopus_spinidactylus	1	0	0		0	0		0	0	0		1	0		0
Elasmopus_thomasi	1	0	0		0	0		0	0	1		0	0		0
Ensayara_jumane	0	0	0		0	1		0	0	0		0	0		0
Eobrolgus_spinosus	1	0	0		1	0		0	0	0		1	0		0
Erichthonius_brasiliensis	1	0	0		1	0		1	0	1		1	0		1
Erichthonius_rubricornis	0	0	0		1	0		0	0	0		1	0		0
Eriopisa_elongata	0	0	0		0	0		0	0	0		0	0		0
Eriopisa_incisa	0	0	0		0	0		0	0	0		1	0		0
Eriopisa_mochimae	0	0	0		0	0		0	0	0		1	0		0
Eudevenopus_honduranus	0	0	0		1	0		0	0	0		1	0		0
Eudevenopus_metagracilis	0	0	0		0	0		1	1	0		1	0		0
Eurythenes_gryllus	0	0	0		0	0		0	0	0		0	0		0
Eurythenes_obesus	0	0	0		1	0		0	0	0		0	0		0
Eusirogenes_adad	0	0	0		0	0		0	1	0		0	0		0
Eusiroides_monoculoides	0	0	0		0	0		0	0	0		1	0		0
Eusiroides_yucatanensis	0	0	0		0	0		0	0	0		1	0		0
Falcanassa_falcata	0	0	0		0	0		0	0	0		0	1		0
Floresorchestia_guadalupensis	0	0	0		0	0		0	0	0		0	0		1
Gammarella_carausui_o_Mallacoota_carausui	1	0	0		0	0		0	0	0		0	0		0
Gammarella_curvata	0	0	0		0	0		0	0	0		0	1		0
Gammarella_muelleri	1	0	0		0	0		0	0	0		1	0		0
Gammaropsis_arawakia	0	0	0		0	0		0	0	0		1	0		0
Gammaropsis_atlantica	1	0	0		1	0		0	0	1		1	0		0
Gammaropsis_togoensis	0	0	0		1	1		0	0	0		1	0		0
Gammarus_mucronatus	0	0	0		1	0		0	0	0		0	0		0
Garosyrrhoe_bigarra	0	0	0		0	1		0	0	0		1	0		0
Garosyrrhoe_luquei	1	0	0		0	0		0	0	0		0	0		0
Gibberosus_myersi	0	0	0		1	0		0	0	0		1	0		0
Gitana_dominica	0	0	0		1	0		0	0	0		1	0		0
Globosolembos_smithi	1	0	0		1	0		0	0	0		1	0		0
Grandidierella_bonnieroides	1	0	0		1	0		0	0	1		1	0		0
Haploops_setosa	0	0	0		0	0		0	0	0		0	0		0
Harpinia_excavata	0	0	0		0	0		0	1	0		0	0		0
Harpinia_intermedia	0	0	0		0	0		0	0	0		0	0		1
Hartmanodes_nyei	0	0	0		1	1		0	0	0		1	0		0
Hemiaegina_minuta	1	0	0		1	0		0	0	1		1	0		0
Hemiproto_wigleyi	0	0	0		1	0		0	0	0		1	0		0
Heterophoxus_oculatus	1	0	0		0	0		0	0	0		1	0		0
Hoplopheonoides_obesa	0	0	0		1	0		0	0	0		0	0		0
Hoplopheonoides_shoemakeri	1	0	0		0	0		0	0	0		0	0		0
Hornellia_atlanticus	0	0	0		0	1		0	0	0		0	0		0
Hornellia_tequestae	0	0	0		0	0		0	0	0		1	0		0
Hourstonius_laguna	0	0	0		1	0		0	0	1		1	0		0
Hourstonius_petulans	0	0	0		0	0		0	0	0		1	0		0
Hourstonius_templadoi	1	0	0		0	0		0	0	0		1	0		0
Hourstonius_tortugae	1	0	0		1	0		0	0	1		1	0		0
Hyale_diplodactyla	0	0	0		0	0		0	0	0		0	0		1
Hyale_media	1	0	0		1	0		0	0	1		1	0		0
Hyale_perieri	1	0	0		1	0		0	0	0		1	0		1
Hyale_pygmaea	0	0	0		0	0		0	0	0		1	0		1
Ileraustroe_torpens	0	1	0		0	0		0	0	0		0	0		0
Latacunga_comanita	0	0	0		0	0		0	0	1		0	0		0
Lepechinella_aberrantis	0	1	0		0	0		0	0	0		0	0		0
Lepechinella_raua	0	0	0		0	0		0	1	0		0	0		0
Lepiduristes_lepidus	0	1	0		0	0		0	0	0		0	0		0
Leptocheirus_rhiziphorae	1	0	0		1	0		0	0	0		1	0		0
Leucothoe_ashleyae	0	1	0		0	0		0	0	0		0	0		0
Leucothoe_ayrtonia	0	0	0		0	0		0	0	0		0	0		1
Leucothoe_kensleyi	0	0	0		1	1		0	0	0		0	0		0
Leucothoe_laurenci	1	0	0		0	0		0	0	0		1	0		0
Leucothoe_panpulco	0	0	0		0	0		0	1	0		0	0		0
Leucothoe_spinicarpa	1	0	0		1	0		0	0	1		1	0		1
Liljeborgia_bousfieldi	1	0	0		1	0		0	0	0		0	0		0
Liocuna_caeca	0	0	0		0	0		0	0	0		0	0		0
Listriella_andresi	0	0	0		0	0		0	0	0		1	0		0
Listriella_barnardi	0	0	0		1	1		0	0	0		0	0		0
Listriella_carinata	0	0	0		1	0		0	0	0		1	0		0
Listriella_kensleyi	1	0	0		0	0		0	0	0		0	0		0
Listriella_quintana	0	0	0		0	0		0	0	0		0	0		0
Lysianassa_nasuta	1	0	0		0	0		0	0	0		0	0		0
Lysianopsis_alba	1	0	0		1	0		0	0	0		1	0		0
Lysianopsis_hummelicnki	0	0	0		0	0		0	0	0		0	1		0
Lysianopsis_ozona	0	0	0		0	0		0	0	0		0	0		0
Maera_jerrica	0	0	0		1	0		0	0	0		0	0		0
Maera_rathbunae	1	0	0		0	0		0	0	0		0	0		0
Maera_williamsi	1	0	0		0	0		0	0	0		0	0		0
Maeracoota_galani	0	0	0		0	0		0	0	0		1	0		0
Marigidiella_crassipes	0	0	0		0	0		0	0	0		0	0		1
Mayerella_redunca	0	0	0		0	0		0	0	0		1	0		0
Melita_dentata	0	0	0		0	0		0	0	0		1	0		0
Melita_leiotelson	0	0	0		0	0		0	0	0		1	0		0
Melita_longisetosa	1	0	0		1	0		0	0	0		0	0		0
Melita_nitida	1	0	0		1	0		0	0	1		0	0		0
Melita_persona	0	0	0		0	0		0	0	0		1	0		0
Melita_stocki	0	0	0		0	0		0	0	0		1	0		0
Metaniphargus_anchihalinus	0	0	0		0	0		0	0	0		0	0		0
Metaniphargus_bousfieldi	0	1	0		0	0		0	0	0		0	0		0
Metaniphargus_chaetodactylus	0	0	1		0	0		0	0	0		0	0		0
Metaniphargus_crenatus	0	0	1		0	0		0	0	0		0	0		0
Metaniphargus_curasavicus_curasavicus	0	0	0		0	0		0	0	0		0	1		0
Metaniphargus_haitianus	0	0	1		0	0		0	0	0		0	0		0
Metaniphargus_hyporheicus	0	0	0		0	0		0	0	0		0	0		0
Metaniphargus_jamaicae	0	0	0		0	0		0	0	0		0	0		0
Metaniphargus_juberthiei	0	0	0		0	0		0	0	0		0	0		1
Metaniphargus_longipalpus	0	0	1		0	0		0	0	0		0	0		0
Metaniphargus_palpator	0	0	0		0	0		0	0	0		0	0		1
Metaniphargus_pedunculatus	0	0	1		0	0		0	0	0		0	0		0
Metaniphargus_plumicauda	0	0	1		0	0		0	0	0		0	0		0
Metaniphargus_sabulonis	0	0	0		0	0		0	0	0		0	0		0
Metaprotella_hummelincki	1	0	0		0	0		0	0	0		1	0		0
Metatiron_bellairsi	0	0	0		0	1		0	0	0		1	0		1
Metatiron_tropakis	0	0	0		1	0		0	0	0		1	0		0
Metharpinia_floridana	1	0	0		1	0		0	0	0		1	0		0
Metharpinia_oripacifica	0	0	0		0	0		1	0	0		0	0		0
Microjassa_tetradonta	0	0	0		0	0		1	0	0		0	0		0
Microphoxus_minimus	0	0	0		0	0		1	0	0		0	0		0
Microprotopus_raneyi	0	0	0		0	0		0	0	1		1	0		0
Microprotopus_shoemakeri	0	0	0		0	0		0	0	0		1	0		0
Miramarassa_sanchezi	1	0	0		0	0		0	0	0		0	0		0
Monocorophium_acherusicum	1	0	0		1	0		0	0	0		1	0		1
Monocorophium_insidisiosum	1	0	0		1	0		0	0	0		0	0		0
Nasageneia_bacescui	1	0	0		0	0		0	0	1		0	0		0
Nasageneia_comisariensis	0	0	0		0	0		0	0	1		0	0		0
Nasageneia_yucatanensis	0	0	0		1	0		0	0	1		1	0		0
Neoischyrocerus_vidali	1	0	0		0	0		0	0	0		0	0		0
Neomegamphopus_heardi	0	0	0		0	0		0	0	0		1	0		0
Neomegamphopus_hiatus	0	0	0		1	0		0	0	0		1	0		0
Neomegamphopus_kalanii	0	0	0		0	0		0	0	0		1	0		0
Neomeganphopus_rooselveti	0	0	0		0	0		0	0	0		1	0		0
Nepanamixis_dianthus	0	0	0		0	0		0	0	0		0	0		0
Netamelita_barnardi	0	0	0		0	0		0	0	0		1	0		0
Netamelita_tabaci	0	0	0		0	1		0	0	0		0	0		0
Nototropis_minikoi	1	0	0		1	0		1	0	1		1	0		0
Nototropis_urocarinatus	0	0	0		1	0		0	0	0		0	0		0
Oediceroides_synparis	0	0	0		0	0		0	1	0		0	0		0
Orchestia_grillus	0	0	0		0	0		0	0	1		0	0		0
Orchomene_stocki	0	0	0		0	0		0	0	0		0	0		1
Orenoquia_serrata	0	0	0		0	0		0	0	0		0	0		1
Ottenwalderia_kymbalion	0	0	1		0	0		0	0	0		0	0		0
Paracaprella_barnardi	0	0	0		0	0		0	1	0		1	0		0
Paracaprella_digitimanus	0	0	0		0	0		0	0	0		1	0		0
Paracaprella_pusilla	1	0	0		1	0		0	0	1		1	0		0
Paracaprella_tenuis	0	0	0		1	0		0	0	0		1	0		0
Paracentromedon_carabicus	0	0	0		0	0		0	1	0		0	0		0
Parahaustorius_attenuatus	0	0	0		0	0		0	0	0		0	0		0
Parametopella_texensis	0	0	0		1	0		0	0	0		0	0		0
Paramicrodeutopus_myersi	0	0	0		0	0		0	0	0		1	0		0
Parargissa_galatheae_americana	0	0	0		0	0		0	1	0		0	0		0
Parhyale_fascigera	0	1	1		1	0		0	0	1		1	1		1
Parhyale_hawaiensis	1	1	1		1	0		0	0	0		1	1		1
Parhyale_inyacka	1	0	0		0	0		0	0	0		1	0		0
Parhyalella_whelpleyi	1	0	0		1	0		0	0	0		0	0		0
Pariphinotus_seclusus	1	0	0		1	1		0	0	0		1	0		0
Pariphinotus_seticoxa	1	0	0		0	0		0	0	0		0	0		0
Parpano_cebus	0	0	0		0	0		0	0	1		0	0		0
Parpano_composturus	0	1	0		0	0		0	0	0		0	0		0
Pedicorophium_laminosum	0	0	0		1	0		0	0	1		1	0		0
Perampithoe_femorata	0	0	0		0	0		0	0	0		1	0		0
Perioculodes_cerasinus	0	0	0		0	1		0	0	0		0	0		0
Photis_dentata	0	0	0		0	0		0	0	0		1	0		0
Photis_longicaudata	0	0	0		1	0		0	0	0		1	0		0
Photis_macromana	0	0	0		1	0		0	0	0		1	0		0
Photis_melanica	0	0	0		1	0		0	0	0		1	0		0
Photis_pugnator	0	0	0		1	0		0	0	0		0	0		0
Photis_reinhardi	0	0	0		0	0		0	0	0		1	0		0
Photis_trapherus	1	0	1		1	0		0	0	0		1	0		1
Phtisica_marina	1	0	0		1	0		0	0	0		1	0		0
Pintoweckelia_grandis	0	0	1		0	0		0	0	0		0	0		0
Platorchestia_platensis	0	0	0		1	0		0	0	0		0	0		1
Plesiolembos_rectangulatus	1	0	0		0	0		0	0	0		0	0		0
Podocerus_brasiliensis	1	1	0		1	0		0	0	0		1	0		0
Podocerus_cristatus	0	0	0		0	0		0	0	0		1	0		0
Podocerus_kleidus	1	0	0		0	0		0	0	0		1	0		0
Podocerus_lazowasemi	0	0	0		0	0		0	0	0		1	0		0
Pontogeneia_bartschi	1	0	0		0	0		0	0	0		1	0		0
Proharpinia_barbada	0	0	0		0	0		0	0	0		0	0		1
Protohadzia_schoenerae	0	1	0		0	0		0	0	0		0	0		0
Protohyale_macrodactyla	0	0	0		1	0		0	0	0		1	0		1
Psammogammarus_bluefieldensis	0	0	0		0	0		0	0	0		0	0		0
Psammogammarus_longidactylus	0	0	0		0	0		0	0	0		0	1		0
Psammomelita_uncinata	0	0	0		0	0		0	0	0		0	1		0
Pseudoaeginella_biscaynensis	1	0	0		1	0		0	0	0		1	0		0
Pseudoaeginella_colombiensis	0	0	0		0	0		0	0	1		0	0		0
Pseudoamphithoides_bacescui	1	0	0		0	0		0	0	1		0	0		0
Pseudoamphithoides_incurvaria	0	0	0		0	0		0	0	0		0	0		1
Pseudomegamphopus_banardi	0	0	0		0	0		1	0	0		0	0		0
Pseudomegamphopus_excavatus	0	0	0		0	0		0	0	0		1	0		0
Pseudunciola_obliquua	0	0	0		0	0		0	0	0		0	0		0
Quadrimaera_ceres	0	0	0		0	0		0	0	0		1	0		0
Quadrimaera_cristianae	0	0	0		0	0		0	0	0		1	1		1
Quadrimaera_inaequipes	1	0	0		0	0		0	0	0		1	0		0
Quadrimaera_miranda	0	0	0		1	0		0	0	0		1	1		1
Quadrimaera_pacifica	1	0	0		1	0		0	0	1		1	0		0
Quadrimaera_pieteri	0	0	0		0	0		0	0	0		0	0		1
Quadrimaera_quadrimana	1	0	0		1	0		0	0	0		1	0		0
Quadrimaera_sarae	1	0	0		0	0		0	0	0		1	0		0
Quadrimaera_serrata	1	0	0		0	0		0	0	0		0	0		0
Quadrivisio_lutzi	0	0	0		0	0		0	0	0		1	0		0
Rachotropis_lobata	0	1	0		0	0		0	0	0		0	0		0
Rachotropis_portoricana	0	1	0		0	0		0	0	0		0	0		0
Rachotropis_winvaderi	1	0	0		0	0		0	0	0		0	0		0
Resupinus_spinicaudatus	0	0	0		0	1		0	0	0		0	0		0
Rhepoxynius_epistomus	1	0	0		0	0		0	0	0		0	0		0
Rildardanus_laminosa	0	0	0		0	0		0	0	0		0	0		0
Rudilemboides_heardi	1	0	0		0	0		0	0	0		1	0		0
Rudilemboides_naglei	0	0	0		1	0		0	0	0		1	0		0
Saliweckelia_emarginata	0	0	0		0	0		0	0	0		0	1		0
Saliweckelia_holsingeri	0	0	0		0	0		0	0	0		0	1		0
Seba_aloe	1	0	0		0	0		0	0	0		0	0		0
Seba_robusta	0	0	0		0	0		0	0	1		0	0		0
Sennaia_bidactyla	0	0	0		0	0		0	0	0		0	0		1
Shoemakerella_cubensis	1	0	0		1	0		0	0	0		1	0		0
Socarnopsis_catacumba	1	0	0		0	0		0	0	0		0	0		0
Stegocephaloides_calypsonis	0	0	0		0	0		0	0	0		1	0		0
Stenopleura_atlantica	1	0	0		0	0		0	0	0		0	0		0
Stenothoe_gallensis	1	0	0		1	0		1	0	0		1	0		0
Stenothoe_valida	1	0	0		0	0		0	0	1		0	0		0
Stephonyx_biscaynensis	0	1	0		1	0		0	0	0		0	0		1
Stephonyx_carinatus	0	0	0		0	0		0	0	0		0	0		1
Stephonyx_incertus	0	0	0		0	0		0	0	0		0	0		1
Sunamphitoe_pelagica	0	0	0		1	0		0	0	0		1	0		0
Synopia_scheelana	0	0	0		0	0		0	0	0		0	0		1
Synopia_ultramarina	1	0	0		1	0		0	0	0		1	0		0
Syrrhoe_papyracea	0	0	0		0	0		0	0	0		0	0		1
Tabatzius_copillius	0	0	0		0	0		0	0	0		1	0		0
Tabatzius_muelleri	1	0	0		1	0		0	0	0		0	0		0
Talorchestia_fritzi	1	0	0		0	0		1	0	0		1	0		0
Talorchestia_marcuzzi	0	0	0		0	0		0	0	0		1	0		0
Talorchestia_margaritae	0	0	0		0	0		0	0	0		1	0		0
Tethorchestia_antillensis	1	0	0		1	0		0	0	0		1	0		1
Tethorchestia_karukerae	0	0	0		0	0		0	0	0		0	0		1
Tethorchestia_sulensoni	0	0	0		0	0		0	0	0		0	0		1
Tethygeneia_bartschi	1	0	0		0	0		0	0	0		1	0		0
Tethygeneia_longleyi	1	0	0		0	0		0	0	0		1	0		0
Thalassostygius_exiguus	0	0	0		0	0		0	0	0		0	1		0
Tiburonella_morrocoyensis	0	0	0		0	0		0	0	0		1	0		0
Tiburonella_viscana	0	0	0		0	1		0	0	1		1	0		1
Tritella_chibcha	0	0	0		0	0		0	0	1		0	0		0
Tropichelura_gomezi	1	1	0		1	1		0	0	0		1	0		0
Tropichelura_insulae	0	1	0		0	0		1	0	0		0	0		0
Tryphosella_apalachicola	0	0	0		0	0		0	0	0		1	0		0
Tryphosella_uristesi	0	0	0		0	0		0	0	0		0	0		1
Uhlorchestia_uhleri	0	0	0		1	0		0	0	0		0	0		0
Vemana_compressa	0	0	0		0	0		0	1	0		0	0		0
Victoriopisa_guanarocana	1	0	0		0	0		0	0	0		0	0		0
Westwoodilla_longimana	0	1	0		0	0		0	0	0		1	0		0
	131	25	16		133	24		21	21	63		195	20		46
