# Supplementary material for: Marine Biodiversity in the Caribbean: Regional Estimates and Distribution Patterns
Source: PLoS One. 2010 Aug 2;5(8):e11916. doi: 10.1371/journal.pone.0011916 (PMC2914069; doi:10.1371/journal.pone.0011916)
Supplement: Table S8 — List of echinoderm (Echinodermata) species of the Caribbean and countries by ecoregion where the species have been reported. Data compiled by Juan José Alvarado. (0.10 MB XLS) [file pone.0011916.s008.xls]

## Sheet: Sheet1
Table S8. List of echinoderm (Echinodermata) species of the Caribbean and countries by ecoregion where the species have been reported. Data compiled by Juan José Alvarado.
	Greater Antilles						Western Caribbean					Southwestern Caribbean					Southern Caribbean			Eastern Caribbean
SPECIES	CUBA	PUERTO RICO	DOMINICAN REPUBLIC	HAITI	JAMAICA		MEXICO	BELIZE	GUATEMALA	HONDURAS		NICARAGUA	COSTA RICA	PANAMA	COLOMBIA		VENEZUELA	TRINIDAD & TOBAGO		LESSER ANTILLES		INTERNATIONAL WATERS
Analcidometra_armata	0	1	1	0	1		0	1	0	1		0	1	1	0		0	0		0		0
Oligometra_caribbea	0	0	0	0	0		0	0	0	0		0	0	1	0		0	0		0		0
Comactinia_echinoptera	1	1	1	1	1		1	0	1	1		1	1	1	0		0	0		0		0
Comactinia_meridionalis	1	1	1	1	0		1	0	0	1		1	0	1	1		0	0		0		0
Davidaster_discoidea	1	1	1	0	1		0	1	1	1		1	1	1	1		0	0		1		0
Davidaster_insolitus	0	0	0	0	0		0	0	0	0		0	0	1	0		0	0		0		0
Davidaster_rubiginosus	1	1	1	1	1		1	1	0	1		0	1	1	1		1	0		0		0
Leptonemaster_venustus	1	1	1	1	1		0	0	0	1		0	0	1	0		1	0		1		0
Nemaster_grandis	0	0	1	0	1		0	0	0	1		1	0	1	0		1	0		0		0
Neocomatella_alata	0	0	0	0	0		1	0	0	0		0	0	0	0		0	0		0		0
Neocomatella_pulchella	1	0	1	0	0		0	0	0	0		1	0	1	1		1	0		1		0
Crinometra_brevipinna	0	0	1	0	1		1	0	0	0		1	0	0	0		1	1		1		0
Antedon_bifida	0	0	0	0	0		0	0	0	0		0	0	0	0		1	0		0		0
Coccometra_hagenii	1	0	0	0	0		0	0	0	0		0	0	0	0		0	0		0		0
Coccometra_nigrolineata	0	1	0	0	1		1	0	0	0		0	0	0	0		0	0		0		0
Ctenantedon_kinziei	0	0	0	0	1		0	1	0	0		0	0	1	0		0	0		1		0
Hypalometra_defecta	0	0	1	0	0		0	0	0	0		0	0	1	0		0	0		0		0
Polimetra_prolixa	0	0	1	0	0		0	0	0	0		0	0	0	0		0	0		0		0
Trichometra_cubensis	1	0	0	1	0		0	0	0	0		1	0	0	1		0	0		0		0
Zenometra_columnaris	0	0	0	1	0		0	0	0	0		0	0	0	0		0	0		0		0
Atelecrinus_balanoides	1	0	0	0	1		0	0	0	0		0	0	0	1		0	1		1		0
Stylometra_spinifera	0	0	1	0	1		0	1	0	1		0	0	0	0		1	0		0		0
Tropiometra_carinata	0	0	1	0	0		0	0	0	0		0	0	0	0		1	1		1		0
Endoxocrinus_parrae	1	0	0	1	1		1	0	0	1		0	0	0	1		0	0		0		0
Cenocrinus_asteriscus	0	0	1	0	0		0	0	0	0		0	0	0	0		0	0		0		0
Neocrinus_decorus	0	0	1	0	1		0	0	0	1		0	0	0	0		1	0		1		0
Holopus_rangii	1	0	1	0	1		0	0	0	0		0	0	0	0		0	0		1		0
Democrinus_brevis	0	0	0	0	0		0	0	0	0		0	0	1	0		1	0		0		0
Democrinus_conifer	0	0	0	1	1		0	0	0	1		1	0	1	0		0	0		1		0
Democrinus_rawsoni	0	0	1	0	0		0	0	0	0		1	0	1	0		0	0		1		0
Luidia_alternata	1	1	1	0	0		1	0	0	1		0	0	1	1		1	0		0		0
Luidia_bardabensis	0	1	1	0	0		1	0	0	0		1	0	0	1		1	0		0		0
Luidia_clathrata	1	1	1	0	0		1	1	0	1		1	0	1	1		1	0		0		0
Luidia_heterozona	0	0	0	0	0		0	0	0	0		0	0	0	1		1	0		0		0
Luidia_ludwigi	0	0	0	0	0		1	0	0	0		0	0	0	1		1	0		0		0
Luidia_sarsi	0	0	0	0	0		0	0	0	0		0	0	0	1		0	0		0		0
Luidia_senegalensis	1	1	1	1	1		0	0	0	1		1	1	1	1		1	0		1		0
Astropecten_acuturadiatus	0	0	0	0	0		0	0	0	0		0	0	0	0		1	0		0		0
Astropecten_alligator	0	0	1	0	0		0	0	0	1		1	0	0	1		0	0		0		0
Astropecten_americanus	0	0	0	0	0		0	0	0	0		1	0	0	1		0	0		0		0
Astropecten_antillensis	1	0	0	0	0		0	0	0	0		0	0	0	1		1	0		0		0
Astropecten_articulatus	1	1	1	0	1		0	1	1	1		1	1	1	1		1	0		1		0
Astropecten_brasiliensis	0	0	0	0	0		0	0	0	0		0	0	0	0		1	0		0		0
Astropecten_caribemexicanensis	0	0	0	0	0		1	0	0	0		0	0	0	0		0	0		0		0
Astropecten_cingulatus	0	0	0	0	0		1	0	0	0		1	1	1	0		0	0		0		0
Astropecten_comptus	0	0	0	0	0		1	0	0	0		0	0	0	0		0	0		0		0
Astropecten_duplicatus	1	1	1	0	1		1	1	0	1		1	0	0	0		0	1		0		0
Astropecten_marginatus	0	1	1	0	0		0	0	0	0		0	1	0	1		1	0		0		0
Astropecten_nitidus	0	0	1	0	0		1	0	0	1		1	0	0	1		0	0		0		0
Blakiaster_conicus	0	0	1	0	0		0	0	0	1		0	0	0	0		0	0		0		0
Dipsacaster_antillensis	0	0	0	0	0		0	0	0	0		0	0	0	1		0	0		0		0
Persephonaster_echinulatus	0	0	0	0	0		1	0	0	1		1	0	1	1		0	0		0		0
Persephonaster_leptactis	1	0	0	0	0		0	0	0	0		0	0	0	0		0	0		0		0
Persephonaster_patagiatus	0	0	0	1	1		0	0	0	0		1	0	1	0		1	0		0		0
Plutonaster_agassizi	0	0	0	0	0		0	0	0	0		0	0	0	1		0	0		0		0
Plutonaster_efflorescens	1	1	0	0	1		0	0	0	0		0	0	0	0		1	0		0		0
Psilaster_cassiope	0	0	0	0	0		0	0	0	0		0	0	0	1		1	0		0		0
Tethyaster_grandis	0	0	1	0	0		1	0	0	0		0	0	0	1		0	0		0		0
Tethyaster_vestitus	0	0	0	0	0		1	0	0	0		0	0	1	1		1	0		0		0
Goniopecten_demonstrans	0	0	0	0	1		0	1	0	0		0	0	1	1		1	0		0		0
Prionaster_elegans	0	0	0	0	0		1	0	0	0		1	0	0	1		1	0		0		0
Styracaster_elongatus	0	0	0	0	0		0	0	0	0		0	0	0	0		0	0		0		1
Thoracaster_cylindratus	0	1	0	0	0		1	0	0	0		0	0	0	0		1	0		0		0
Benthopecten_simplex	0	0	0	1	0		1	0	0	0		0	0	0	0		0	0		0		1
Cheiraster_(Barbadosaster)	0	0	1	0	0		1	1	0	0		1	0	0	1		1	0		0		0
Cheiraster_(Cheiraster)_planus	0	0	0	0	1		1	0	0	1		0	0	0	1		0	1		0		0
Cheiraster_(Cheiraster)_sepitus	1	0	0	0	0		0	0	0	0		0	0	0	1		1	0		0		0
Cheiraster_(Christopheraster)_blakei	1	0	0	0	1		1	1	0	1		0	0	0	1		0	0		0		0
Cheiraster_(Christopheraster)_mirabilis	1	1	0	0	1		0	0	0	0		1	0	0	1		0	0		0		0
Pectinaster_gracilis	0	0	0	0	0		0	0	0	1		0	0	0	0		0	0		0		0
Marginaster_pectinatus	1	0	0	0	0		1	0	0	0		0	0	0	1		0	0		0		0
Asterina_folium	0	1	0	0	0		1	1	0	0		0	0	1	1		1	0		0		0
Asterina_hartmeyeri	1	1	0	0	1		1	0	0	0		0	0	0	0		0	1		1		0
Asterinopsis_pilosa	0	0	0	0	0		0	0	0	0		0	0	0	0		0	0		1		0
Paxillasterina_pompom	0	0	0	0	0		0	0	0	0		0	0	1	0		0	0		0		0
Stegnaster_wesseli	0	0	0	0	1		0	0	0	0		0	0	0	1		1	1		1		0
Leilaster_radians	0	0	0	0	0		1	0	0	0		0	0	0	0		0	0		0		0
Anthenoides_piercei	1	0	1	0	0		1	1	0	0		1	0	0	1		1	1		1		0
Apollonaster_yucatanensis	0	0	0	0	0		1	0	0	0		0	0	0	1		0	0		0		0
Astroceramus_brachyactis	1	0	0	0	0		0	0	0	0		0	0	0	1		1	0		0		0
Ceramaster_grenadensis	0	0	1	1	0		0	0	0	1		1	0	0	0		0	0		0		0
Circeaster_americanus	0	0	0	0	0		1	0	0	0		1	0	0	0		0	1		0		0
Cladaster_rudis	0	0	0	0	0		0	0	0	0		0	0	0	0		0	0		0		1
Diplasiaster_productus	0	0	0	0	0		0	0	0	0		0	0	0	0		1	0		0		0
Floriaster_maya	0	0	0	0	0		1	0	0	0		0	0	0	0		0	0		0		0
Goniaster_tessellatus	0	0	0	0	0		1	0	0	0		0	0	0	0		1	0		0		0
Litonotaster_intermedius	0	0	0	1	0		0	0	0	0		0	0	0	0		0	0		0		0
Nymphaster_arenatus	0	0	0	1	0		1	0	0	1		1	0	1	1		1	0		0		0
Paragonaster_grandis	1	0	0	0	0		1	0	0	0		0	0	0	0		0	0		0		0
Peltaster_placenta	1	0	0	1	0		0	0	0	0		0	0	0	0		0	0		0		0
Plinthaster_dentatus	0	0	0	0	0		0	0	0	1		1	0	1	1		1	1		0		0
Pseudarchaster_gracilis	0	0	1	1	0		1	0	1	1		1	0	0	1		0	0		0		0
Rosaster_alexandri	1	0	0	0	0		0	0	0	0		0	0	0	1		0	0		0		0
Tosia_parva	0	0	1	0	0		1	0	0	0		0	0	0	1		0	0		0		0
Oreaster_reticulatus	1	1	1	1	0		1	1	1	1		1	1	1	1		1	0		0		0
Poraniella_echinulata	1	1	0	0	0		0	1	0	0		0	1	1	0		0	0		1		0
Mithrodia_clavigera	1	0	0	0	0		1	0	0	0		1	0	0	0		0	0		0		0
Copidaster_lymani	1	0	0	0	0		0	1	0	0		0	0	1	0		0	0		0		0
Linckia_bouvieri	1	0	0	0	0		1	0	0	0		0	0	0	0		0	0		0		0
Linckia_guildingi	1	1	1	1	1		1	1	1	0		0	1	1	0		1	0		0		0
Linckia_nodosa	0	0	0	0	0		1	0	0	0		0	0	0	0		0	0		0		0
Narcissia_trigonaria	0	0	0	0	0		1	0	0	0		0	0	1	0		0	0		0		0
Ophidiaster_bullisi	0	0	0	0	0		0	0	0	0		0	0	0	0		0	0		1		0
Ophidiaster_guildingi	1	1	1	0	0		1	1	0	0		0	0	1	0		0	0		1		0
Tamaria_floridae	0	0	0	0	0		0	1	0	0		0	0	0	0		0	0		0		0
Tamaria_halperni	0	0	0	1	0		1	0	0	0		0	0	0	1		0	0		0		0
Caymanostella_spinimarginata	0	0	0	1	1		0	0	0	0		0	0	0	1		0	0		0		0
Laetmaster_spectabilis	1	0	0	0	0		0	0	0	0		0	0	0	0		0	0		0		0
Lophaster_furcifer	1	0	0	0	0		0	0	0	0		0	0	0	0		0	0		0		0
Solaster_caribbaeus	0	0	0	0	0		0	0	0	0		0	0	0	0		0	0		1		0
Solaster_notophrynus	0	0	0	0	0		0	0	0	0		0	0	0	0		0	0		1		0
Calyptraster_coa	0	0	0	0	0		0	0	0	0		0	0	0	0		0	0		1		0
Calyptraster_personatus	0	0	0	1	0		0	0	0	0		0	0	0	1		0	0		1		0
Hymenaster_lamprus	0	0	0	0	1		0	0	0	0		0	0	0	0		0	0		0		0
Hymenaster_rex	0	0	0	0	0		0	0	0	1		0	0	0	0		0	0		0		0
Pteraster_abyssorum	0	0	0	1	1		0	0	0	1		0	0	0	0		0	0		0		0
Pteraster_acicula	1	0	0	0	0		0	0	0	0		0	0	1	1		0	0		0		0
Pteraster_militarioides	1	1	0	0	0		0	0	0	0		1	0	0	1		0	0		1		0
Pteraster_personatus	0	0	0	0	0		0	0	0	0		0	0	0	1		0	0		0		0
Pteraster_rugosus	1	1	0	0	0		0	0	0	0		0	0	0	0		0	0		1		0
Remaster_palmatus	1	0	0	0	0		0	1	0	0		0	0	0	0		0	0		1		0
Echinaster_brasiliensis	1	0	0	0	0		0	0	0	1		0	0	1	0		0	0		0		0
Echinaster_echinophorus	1	1	1	0	1		0	0	0	0		1	0	0	0		1	0		0		0
Echinaster_guyanensis	0	0	1	1	1		0	0	1	1		1	0	1	1		1	0		0		0
Echinaster_modestus	0	1	1	0	1		1	1	0	0		1	0	0	0		1	0		1		0
Echinaster_sentus	1	1	0	1	1		1	1	0	1		0	0	0	0		0	0		0		0
Echinaster_serpentarius	0	0	0	0	0		1	0	0	0		0	0	0	1		0	0		0		0
Echinaster_spinulosus	0	0	0	0	0		0	1	0	1		1	0	1	0		0	0		0		0
Henricia_antillarum	0	0	0	0	1		1	0	0	1		1	0	0	0		0	0		1		0
Henricia_downeyae	0	0	0	1	0		0	0	0	0		0	0	0	0		0	0		0		0
Henricia_sexradiata	0	0	0	0	0		0	0	0	0		0	0	0	0		0	0		0		1
Sclerasterias_contorta	0	0	0	0	0		0	0	0	0		0	0	0	0		1	0		1		0
Sclerasterias_tanneri	0	0	0	0	0		0	0	0	1		0	0	0	0		0	0		0		0
Stephanasterias_albula	0	0	0	0	0		0	0	0	0		0	0	0	1		0	0		0		0
Coronaster_briareus	0	0	0	0	0		1	0	0	0		0	0	0	1		0	0		0		0
Pedicellaster_Pourtàlesi	0	0	0	0	0		0	0	0	0		1	0	0	0		0	0		0		0
Doraster_constellatus	0	0	0	0	0		0	0	0	1		0	0	1	1		0	0		0		0
Mammaster_sigsbeei	0	0	0	0	0		0	0	0	1		0	0	0	1		0	0		1		0
Zoroaster_fulgens	0	0	0	1	0		0	0	0	0		0	0	1	1		0	0		0		0
Brisinga_costata	0	0	0	1	0		0	0	0	0		0	0	0	0		1	0		0		0
Brsinga_cricophora	0	0	0	0	0		0	0	0	0		0	0	0	0		0	0		1		0
Midgardia_xandaros	0	0	0	0	0		0	0	0	1		0	0	0	0		0	0		0		0
Novodinia_pandina	1	0	0	0	0		0	0	0	0		0	0	0	0		0	0		0		0
Novodinia_antillensis	0	1	0	0	0		0	0	0	0		0	0	0	0		0	0		0		0
Stegnobrisinga_splendens	0	0	0	0	0		0	0	0	1		0	0	0	0		1	0		0		0
Colpaster_scutigerula	0	0	0	0	0		0	0	0	1		0	0	0	0		0	0		0		0
Ophiomyxa_flaccida	1	1	0	1	0		1	1	1	1		0	0	1	1		1	1		1		0
Ophiomyxa_brevicauda	1	0	0	0	0		0	0	0	0		0	0	0	0		0	0		0		0
Ophiomyxa_stimpsonii	0	0	0	0	0		0	0	0	0		0	0	0	1		0	0		0		0
Ophiomyxa_tumida	0	0	0	0	0		0	0	0	0		0	0	0	1		0	0		0		0
Ophiobyrsa_serpens	0	0	0	0	0		0	1	0	0		0	0	0	0		0	0		0		0
Ophiosyzygus_disacanthus	0	0	0	0	0		0	0	0	0		0	0	0	1		0	0		0		0
Ophioblenna_antillensis	0	1	0	0	0		0	1	0	0		0	0	1	0		0	0		0		0
Asteronyx_loveni	0	0	0	0	0		1	0	0	0		0	0	0	0		1	0		0		0
Asterochema_intectum	0	0	0	0	0		1	0	0	0		0	0	0	0		0	0		0		0
Asterochema_oligactes	0	0	0	0	0		0	0	0	0		0	0	0	1		0	0		0		0
Astrocaneum_herrerai	0	0	0	0	0		1	0	0	0		0	0	0	0		0	0		0		0
Astrocnida_isidis	0	0	0	0	0		0	0	0	0		0	0	0	1		0	0		0		0
Astrophyton_muricatum	1	1	1	1	1		1	1	1	1		1	1	1	1		1	0		1		0
Asteroporpa_annulata	1	1	0	0	0		1	0	0	0		0	0	0	1		0	0		0		0
Schizostella_bifurcata	0	1	0	0	0		0	1	0	0		0	0	0	0		0	0		0		0
Amphiophiura_fasciculata	0	0	0	0	0		1	0	0	0		0	0	0	0		0	0		0		0
Amphiophiura_metabula	0	0	0	0	0		0	0	0	0		0	0	0	1		0	0		0		0
Amphiophiura_oedignatha	0	0	0	0	0		0	0	0	0		0	0	0	1		0	0		0		0
Amphiophiura_oligopora	0	0	0	0	0		1	0	0	0		0	0	0	0		0	0		0		0
Amphipholizona_delicata	0	0	0	0	0		0	0	0	0		0	0	0	1		0	0		0		0
Anthophiura_ingolfi	0	0	0	0	0		1	0	0	0		0	0	0	0		0	0		0		0
Astrophiura_permira	0	0	0	0	0		1	0	0	0		0	0	0	0		0	0		0		0
Ophiambix_devaneyi	0	0	0	0	0		0	0	0	0		0	0	0	1		0	0		0		0
Ophiernus_adspersus_adspersus	0	0	0	0	0		0	0	0	0		0	0	0	1		0	0		0		0
Ophioceramis_januarii	0	0	0	0	0		1	0	0	0		0	0	0	0		0	0		0		0
Ophiolepis_elegans	1	1	0	0	1		1	0	0	1		0	0	1	1		1	1		1		0
Ophiolepis_gemma	1	0	0	0	0		1	1	0	0		0	0	0	0		0	0		0		0
Ophiolepis_impressa	1	1	1	0	0		1	1	0	1		0	1	1	1		1	0		1		0
Ophiolepis_kieri	1	0	0	0	0		0	0	0	0		0	0	1	0		0	0		0		0
Ophiolepis_paucispina	1	1	0	1	1		1	1	0	0		0	0	1	0		0	1		1		0
Ophiolepis_pawsoni	0	0	0	0	0		0	1	0	0		0	0	0	0		0	0		0		0
Ophiomastus_secundus	0	0	0	0	0		0	0	0	0		0	0	0	1		0	0		0		0
Ophiomusium_acuferum	0	0	0	0	0		1	0	0	0		0	0	0	1		0	0		1		0
Ophiomusium_eburneun	0	0	0	0	0		0	0	0	0		0	0	0	1		0	0		0		0
Ophiomusium_lymani	0	0	0	0	0		1	0	0	0		0	0	0	0		0	0		0		0
Ophiomusium_testudo	0	0	0	0	0		0	0	0	0		0	0	0	1		0	0		0		0
Ophiomusium_validum	0	0	0	0	0		0	0	0	0		0	0	0	1		0	0		0		0
Ophiosphalma_planum	0	0	0	0	0		1	0	0	0		0	0	0	0		0	0		0		0
Ophiostriatus_atlanticus	0	0	0	0	0		0	0	0	0		0	0	0	1		0	0		0		0
Ophiothyreus_goesi	0	0	0	0	0		0	0	0	0		1	0	0	1		0	0		0		0
Ophiozonella_nivea	0	0	0	0	0		1	0	0	0		0	0	0	0		0	0		0		0
Ophiura_acervata	0	0	0	0	0		0	0	0	0		0	0	0	1		1	0		0		0
Ophiura_falcifera	0	0	0	0	0		0	0	0	0		0	0	0	1		0	0		0		0
Ophiura_fallax	0	0	0	0	0		1	0	0	0		0	0	0	0		0	0		0		0
Ophiura_tenera	0	0	0	0	0		0	0	0	0		0	0	0	1		0	0		0		0
Ophiernus_adspersus	0	0	0	0	0		1	0	0	0		0	0	0	0		0	0		0		0
Ophiocoma_echinata	1	1	1	1	1		1	1	1	1		1	1	1	1		1	1		1		0
Ophiocoma_paucigranulata	0	0	0	0	0		1	1	0	0		0	1	0	0		0	0		0		0
Ophiocoma_pumila	1	1	1	1	1		1	1	0	1		0	0	1	0		1	1		1		0
Ophiocoma_riisei	0	0	0	1	0		0	0	0	0		0	0	0	0		1	0		0		0
Ophiocoma_wendti	1	1	1	1	1		1	1	0	1		0	1	1	0		0	1		1		0
Ophiocomella_ophiactoides	1	1	1	0	1		1	1	0	0		0	0	1	0		1	1		1		0
Ophiopsila_fulva	0	0	0	0	0		0	0	0	0		0	0	0	1		0	0		0		0
Ophiopsila_hartmeyeri	1	0	0	0	0		1	0	0	0		0	1	0	1		1	0		0		0
Ophiopsila_riisei	1	1	0	1	0		1	1	0	0		0	0	1	0		1	0		0		0
Ophiopsila_vittata	0	0	0	0	0		1	1	0	0		0	0	1	0		0	0		0		0
Ophiochiton_ternispinus	0	0	0	0	0		1	0	0	0		0	0	0	1		0	0		0		0
Ophionereis_dolabriformis	0	0	0	0	0		0	0	0	0		0	0	0	1		0	0		0		0
Ophionereis_olivacea	1	1	0	0	0		1	1	0	0		0	0	1	0		1	0		0		0
Ophionereis_reticulata	1	1	1	1	1		1	1	0	1		0	1	1	0		1	1		1		0
Ophionereis_squamulosa	1	1	0	1	0		1	1	0	0		0	0	1	0		0	1		0		0
Ophionereis_vittata	1	0	0	0	0		0	1	0	0		0	0	1	0		0	0		1		0
Bathypectinura_heros	0	0	0	0	0		1	0	0	1		1	0	1	1		0	0		0		0
Ophioderma_anitae	0	0	0	0	0		0	1	0	0		0	0	0	0		0	0		0		0
Ophioderma_appressum	1	1	1	1	1		1	1	0	1		0	1	1	1		1	1		1		0
Ophioderma_brevicaudum	1	1	1	1	0		1	1	0	0		0	0	1	0		1	0		1		0
Ophioderma_brevispinum	1	1	1	1	1		1	1	0	0		0	1	1	0		1	0		1		0
Ophioderma_cinereum	1	1	1	1	1		1	1	0	1		0	1	1	0		1	1		1		0
Ophioderma_ensiferum	1	0	0	0	0		0	1	0	0		0	0	0	0		0	0		0		0
Ophioderma_guttatum	1	0	0	0	1		1	1	0	0		0	0	0	0		0	1		0		0
Ophioderma_panamense	0	0	0	0	0		0	0	0	0		0	0	1	0		0	0		0		0
Ophioderma_phoenium	1	1	1	0	0		1	1	0	0		0	0	1	0		0	1		0		0
Ophioderma_rubicundum	1	1	1	0	1		1	1	0	0		0	0	1	1		1	1		1		0
Ophioderma_squamosissimum	1	1	0	0	0		0	1	0	0		0	0	0	0		0	0		0		0
Ophiopaepale_goesiana	0	0	0	0	0		0	0	0	0		0	0	0	1		0	0		0		0
Ophiurochaeta_littoralis	0	0	0	0	0		0	1	0	0		0	0	0	0		0	0		0		0
Hemieuryale_pustulata	0	0	0	0	0		0	1	0	0		0	0	1	0		0	0		0		0
Sigsbeia_conifera	1	0	0	0	0		0	1	0	0		0	0	1	0		0	0		0		0
Sigsbeia_murrhina	0	0	0	0	0		0	1	0	0		0	0	0	0		0	0		0		0
Ophiochondrus_convolutus	0	0	0	0	0		0	0	0	0		0	0	0	1		0	0		0		0
Ophiolimna_littoralis	1	0	0	0	0		0	0	0	0		0	0	0	0		0	0		0		0
Ophiocamax_fasciculata	0	0	1	0	0		0	0	0	1		1	0	1	1		0	0		0		0
Ophiocamax_hystrix	0	0	0	0	0		0	0	0	0		0	0	0	1		0	0		0		0
Ophiacantha_echinulata	0	0	0	0	0		0	0	0	0		0	0	0	1		0	0		0		0
Ophiacantha_mesembria	0	0	0	0	0		0	0	0	0		0	0	0	1		0	0		0		0
Ophiacantha_ophiactoides	0	0	1	0	0		0	0	0	0		0	0	0	0		0	0		0		0
Ophiocantha_sertata	0	0	0	0	0		1	0	0	0		0	0	0	0		0	0		0		0
Ophiacantha_oligacantha	0	0	1	0	0		0	0	0	0		0	0	0	0		0	0		0		0
Ophiocanthella_troscheli	0	0	0	0	0		1	0	0	0		0	0	0	0		0	0		0		0
Ophiomitra_valida	0	0	0	0	0		0	0	0	0		0	0	0	1		0	0		0		0
Ophiotrema_gracilis	0	0	0	0	0		0	0	0	0		0	0	0	1		0	0		0		0
Ophiomitrella_laevipellis	0	0	0	0	0		0	0	0	0		0	0	0	1		0	0		0		0
Ophiomitrella_glabra	0	0	1	0	0		0	1	0	0		0	0	0	0		0	0		0		0
Ophiomyces_frutectosus	0	0	0	0	0		0	0	0	0		0	0	0	1		0	0		0		0
Ophiopristis_hirsuta	0	0	0	0	0		0	0	0	0		0	0	0	1		0	0		0		0
Ophiopristis_sertata	0	0	0	0	0		0	0	0	0		0	0	0	1		0	0		0		0
Ophiotreta_valenciennesi	0	0	0	0	0		0	0	0	0		0	0	0	1		0	0		0		0
Hemipholis_elongata	1	1	0	0	0		0	1	0	0		0	0	1	0		0	1		0		0
Histampica_duplicata	0	0	0	0	0		0	0	0	0		0	0	0	1		0	0		0		0
Ophiactis_algicola	0	1	0	0	1		1	1	0	0		0	0	1	0		0	1		0		0
Ophiactis_dispar	0	0	0	0	0		0	0	0	0		0	0	1	0		0	0		0		0
Ophiactis_lymani	0	0	0	0	0		0	0	0	0		0	0	0	0		0	1		0		0
Ophiactis_muelleri	0	0	0	0	0		0	0	0	0		0	0	1	0		1	0		0		0
Ophiactis_quinqueradia	1	1	1	0	0		1	1	0	0		0	0	1	0		0	0		0		0
Ophiactis_rubropoda	0	0	0	0	0		1	0	0	0		0	0	0	0		0	0		0		0
Ophiactis_savignyi	1	1	1	1	0		1	1	0	1		0	1	1	1		1	0		0		0
Amphilimna_mirabilis	0	0	0	0	0		0	0	0	0		0	0	0	1		0	0		0		0
Amphilimna_olivacea	0	0	0	0	0		1	0	0	0		0	0	1	1		0	0		0		0
Amphiodia_atra	0	0	0	0	0		0	0	0	0		0	0	0	1		1	0		0		0
Amphiodia_planispina	1	1	0	0	0		0	0	0	0		0	0	1	1		0	0		0		0
Amphiodia_pulchella	1	1	0	0	1		1	1	0	0		0	0	1	0		0	1		1		0
Amphiodia_riisei	0	0	0	0	0		0	0	0	0		0	0	1	0		0	0		0		0
Amphiodia_trychna	1	1	1	0	0		1	1	0	0		0	0	1	0		1	1		0		0
Amphiodia_violacea	0	0	0	0	0		0	1	0	0		0	0	0	0		0	0		0		0
Amphioplus_abditus	0	0	0	0	0		0	0	0	0		0	0	1	0		0	0		0		0
Amphioplus_coniortodes	1	0	0	0	0		1	0	0	0		0	0	0	0		1	0		0		0
Amphioplus_sepultus	1	0	0	0	0		0	0	0	0		0	0	0	0		0	0		0		0
Amphioplus_thrombodes	1	0	0	0	0		0	0	0	0		0	0	0	0		0	0		0		0
Amphioplus_tumidus	0	0	0	0	0		0	0	0	0		0	0	0	1		0	0		0		0
Amphipholis_gracillima	1	1	0	0	0		0	1	0	0		0	0	0	0		0	1		0		0
Amphipholis_januarii	1	1	0	0	0		0	1	0	0		0	0	1	0		0	1		0		0
Amphipholis_pachybactera	0	0	0	0	0		0	0	0	0		0	0	1	0		0	1		0		0
Amphipholis_squamata	1	1	0	0	0		1	1	1	1		0	0	1	0		1	0		0		0
Amphiura_fibulata	1	0	0	0	0		1	1	0	0		0	0	0	0		0	0		0		0
Amphiura_flexuosa	0	1	0	0	0		0	0	0	0		0	0	0	0		0	0		0		0
Amphiura_incisa	0	0	0	0	0		0	0	0	0		0	0	1	0		0	0		0		0
Amphiura_otteri	0	0	0	0	0		0	0	0	0		0	0	0	1		0	0		0		0
Amphiura_palmeri	0	1	0	0	0		1	0	0	0		0	0	0	0		1	0		0		0
Amphiura_rathbuni	0	0	0	0	0		0	0	0	0		0	0	0	1		1	0		0		0
Amphiura_stimpsoni	1	1	0	1	1		1	1	0	0		0	0	0	0		0	1		1		0
Ophiocnida_scabriuscula	1	1	0	0	1		1	0	0	0		0	0	1	0		1	1		1		0
Ophionema_intricada	0	1	0	0	0		0	0	0	0		0	0	0	0		0	1		0		0
Ophionephthys_limicola	1	1	0	0	0		0	1	0	0		0	0	1	0		0	0		1		0
Ophiophragmus_cubanus	1	0	0	0	0		0	1	0	0		0	0	0	0		0	0		0		0
Ophiophragmus_filograneus	0	0	0	0	0		0	1	0	0		0	0	0	0		0	0		0		0
Ophiophragmus_pulcher	1	1	0	0	0		1	1	0	0		0	0	1	0		0	0		0		0
Ophiophragmus_riisei	0	1	0	1	1		0	0	0	0		0	0	1	1		0	0		0		0
Ophiophragmus_septus	1	1	0	0	0		0	1	0	0		0	0	0	0		0	1		0		0
Ophiophragmus_wurdemani	0	0	0	0	0		0	0	0	0		0	0	0	0		1	0		0		0
Ophiostigma_isocanthum	1	1	0	0	0		1	1	0	0		0	1	1	1		1	1		1		0
Ophiostigma_siva	0	1	0	0	1		0	1	0	0		0	0	1	0		0	0		0		0
Ophioplax_ljungmani	0	0	0	0	0		0	0	0	0		0	0	0	1		0	0		0		0
Ophiothrix_angulata	1	1	1	1	0		1	1	0	0		0	0	1	1		1	0		0		0
Ophiothrix_brachyactis	1	1	0	0	0		1	0	0	0		0	0	0	0		1	1		0		0
Ophiothrix_cimar	0	0	0	0	0		0	0	0	0		0	1	1	0		0	0		0		0
Ophiothrix_lineata	1	0	0	0	0		1	1	0	0		0	1	1	0		0	0		0		0
Ophiothrix_oerstedii	1	1	1	1	1		1	1	0	0		0	0	1	1		1	1		1		0
Ophiothrix_pallida	0	0	0	0	0		0	0	0	0		1	0	0	0		0	0		0		0
Ophiothrix_stri	0	0	0	0	0		0	0	0	0		0	1	1	0		0	0		0		0
Ophiothrix_suensoni	1	1	1	1	0		1	1	0	0		0	1	1	1		1	0		0		0
Ophiothrix_synoecina	0	0	0	0	0		0	0	0	0		0	0	0	1		0	0		0		0
Eucidaris_tribuloides	1	1	1	1	1		1	1	1	1		1	1	1	1		1	0		0		0
Cidaris_abyssicola	0	0	0	0	0		1	0	0	0		0	0	0	0		0	0		0		0
Cidaris_rugosa	0	0	0	0	0		1	1	0	0		0	0	0	0		0	0		0		0
Calocidaris_micans	0	0	0	0	0		1	0	0	0		0	0	0	0		0	0		1		0
Genocidaris_maculata	0	0	0	0	0		1	0	0	0		0	0	0	0		0	0		0		0
Stylocidaris_affinis	1	0	0	0	0		1	0	0	0		1	0	1	1		0	0		0		0
Stylocidaris_lineata	0	0	1	0	0		0	0	0	1		1	0	0	1		0	0		0		0
Tretocidaris_bartletti	0	0	1	0	0		0	0	0	1		0	0	0	1		0	0		0		0
Porocidaris_purpurata	0	0	0	0	0		0	0	0	0		1	0	0	0		0	0		0		0
Araeosoma_belli	0	0	1	0	0		1	0	0	0		1	0	0	1		0	0		0		0
Araeosoma_fenestratum	0	0	1	0	0		0	0	0	0		0	0	0	1		0	0		0		0
Calveriosoma_hystrix	0	0	0	0	0		1	0	0	0		0	0	0	0		0	0		0		0
Hygrosoma_petersi	0	0	0	1	0		1	0	0	0		0	0	0	0		0	0		0		0
Phormosoma_placenta	0	0	0	1	0		0	0	0	1		1	0	1	1		0	0		0		0
Diadema_antillarum	1	1	1	1	0		1	1	1	1		1	1	1	1		1	0		0		0
Centrostephanus_longispinus	0	0	1	0	0		1	0	0	0		0	0	0	0		0	0		0		0
Astropyga_magnifica	1	1	1	0	1		1	0	0	0		0	0	1	1		1	0		1		0
Aspidodiadema_jacobyi	0	0	1	0	0		1	1	0	0		1	0	0	1		0	0		0		0
Plesiodiadema_antillarum	0	0	0	1	0		0	0	0	0		0	0	0	0		0	0		1		0
Caenopedina_cubensis	0	0	0	0	0		0	1	0	0		0	0	0	0		0	0		0		0
Salenia_goesiana	0	0	1	0	0		0	0	0	0		0	0	0	0		0	0		0		0
Salenocidaris_profundi	0	0	0	1	0		0	0	0	0		0	0	0	0		0	0		0		0
Salenocidaris_varispina	0	0	0	1	0		0	0	0	0		0	0	0	0		0	0		0		0
Arbacia_punctulata	1	0	1	0	0		1	1	0	0		0	0	1	0		1	1		0		0
Podocidaris_sculpta	1	0	0	0	0		0	0	0	0		0	0	0	1		0	0		0		0
Coelopleurus_floridanus	0	0	1	0	0		1	1	0	0		0	0	1	1		0	0		0		0
Lytechinus_euerces	0	0	1	1	0		1	1	0	0		0	0	0	0		0	0		0		0
Lytechinus_callipeplus	0	0	0	0	0		0	0	0	0		0	0	0	1		0	0		0		0
Lytechinus_variegatus	1	1	1	1	1		1	1	1	1		0	1	1	1		1	0		0		0
Lytechinus_williamsi	1	0	1	1	0		1	1	0	0		0	0	1	1		0	0		0		0
Pseudoboletia_maculata	0	0	0	0	0		0	0	0	0		0	0	0	0		1	0		1		0
Tripneustes_ventricosus	1	1	1	1	0		1	1	0	1		0	1	1	1		1	0		0		0
Trigonocidaris_albida	0	0	1	0	0		0	0	0	0		0	0	0	1		0	0		0		0
Echinus_gracilis	0	0	0	0	0		1	0	0	0		0	0	0	0		0	0		0		0
Echinometra_lucunter	1	1	1	1	1		1	1	1	1		1	1	1	1		1	0		0		0
Echinometra_viridis	1	1	1	1	0		1	1	1	1		0	1	1	1		1	0		0		0
Echinoneus_cyclostomus	1	0	1	1	0		1	1	0	1		0	1	1	1		0	0		0		0
Clypeaster_chesheri	0	0	1	0	0		1	0	0	1		0	0	1	1		0	0		0		0
Clypeaster_cyclopilus	0	0	0	0	0		0	0	0	0		0	0	0	0		1	0		0		0
Clypeaster_euclastus	0	0	1	0	0		0	0	0	1		0	0	0	1		1	0		0		0
Clypeaster_lamprus	0	0	1	0	0		0	0	0	1		1	0	0	1		1	0		0		0
Clypeaster_luetkeni	0	0	0	1	0		0	0	0	0		0	0	0	1		0	0		0		0
Clypeaster_prostratus	0	0	0	0	0		0	0	0	1		0	0	0	1		1	0		0		0
Clypeaster_ravenelii	0	0	0	0	0		1	0	0	0		0	0	0	0		0	0		0		0
Clypeaster_rosaceus	1	1	1	1	1		1	1	0	1		0	0	1	1		1	0		0		0
Clypeaster_speciosus	0	0	0	0	0		0	0	0	0		0	1	0	0		0	0		0		0
Clypeaster_subdepressus	1	0	1	0	1		1	1	0	0		0	0	1	1		1	0		0		0
Echinocyamus_grandiporus	0	0	0	0	0		1	0	0	0		0	0	0	1		0	0		0		0
Encope_aberrans	0	0	0	0	0		1	0	0	0		0	0	0	0		0	0		0		0
Encope_emarginata	0	0	0	0	0		0	1	1	0		0	0	1	1		1	0		0		0
Encope_michelini	1	0	0	0	0		1	0	0	0		0	0	0	0		1	0		0		0
Leodia_sexiesperforata	1	1	1	0	1		1	1	0	1		0	1	1	1		1	0		1		0
Mellita_quinquiesperforata	1	1	1	0	1		0	0	0	1		1	1	1	1		1	0		0		0
Heterobrissus_hystrix	0	0	0	0	0		0	0	0	1		1	0	0	1		0	0		0		0
Linopneustes_longispinus	0	0	1	0	0		0	0	0	1		1	0	0	1		0	0		0		0
Palaeobrissus_hilgardi	0	0	1	0	0		0	0	0	0		0	0	0	1		0	0		0		0
Palaeopneustes_cristatus	0	0	1	0	0		0	0	0	1		0	0	0	1		0	0		0		0
Palaeopneustes_tholoformis	0	0	1	0	0		0	0	0	0		0	0	0	1		0	0		0		0
Brissopsis_atlantica	0	0	0	0	0		0	0	0	1		1	1	1	1		0	0		1		0
Brissopsis_elongata	0	1	1	0	0		0	1	0	1		0	0	1	1		1	0		0		0
Brissopsis_mediterranea	0	0	0	1	0		0	0	0	0		0	0	0	1		0	0		0		0
Brissus_unicolor	1	0	1	1	0		1	1	0	1		0	1	1	1		1	0		0		0
Meoma_ventricosa	1	1	1	1	1		1	1	1	1		1	1	1	1		1	0		1		0
Plagiobrissus_grandis	1	1	1	0	1		1	1	0	0		0	0	1	1		0	0		0		0
Plethotaenia_spatangoides	0	0	0	0	0		0	0	0	0		1	0	0	0		0	0		0		0
Homolampas_fragibilis	0	0	0	0	0		0	0	0	0		0	0	0	1		0	0		0		0
Agassizia_excentrica	0	0	1	0	0		0	1	0	0		1	0	1	1		0	0		0		0
Brisaster_fragilis	0	0	0	0	0		0	0	1	0		0	0	0	0		0	0		0		0
Hypselaster_limicolus	0	0	0	0	0		0	0	0	1		0	0	0	1		0	0		0		0
Moira_atropos	1	1	1	0	0		0	1	0	1		0	0	1	1		1	0		0		0
Paraster_doederleini	0	0	1	0	0		0	1	0	1		1	0	1	0		0	0		0		0
Paraster_floridiensis	0	0	1	0	0		0	1	0	1		0	0	1	0		0	0		0		0
Schizaster_orbignyanus	0	0	0	0	0		0	0	0	0		0	0	0	1		1	0		0		0
Conolampas_sigsbei	0	0	1	0	0		0	0	0	1		1	0	0	0		0	0		0		0
Echinolampas_depressa	0	0	0	0	0		1	0	0	0		0	0	0	0		0	0		0		0
Cassidulus_caribaearum	0	0	1	0	0		1	1	0	0		0	0	1	0		0	0		0		0
Neothyonidium_parvum	0	1	0	0	0		0	0	0	0		0	0	1	0		0	0		0		0
Stolus_cognatus	1	0	0	0	0		1	0	0	0		0	0	1	0		1	0		0		0
Phyllophorus_occidentalis	1	1	0	0	0		1	0	0	0		0	0	1	0		1	1		1		0
Thyone_deichmannae	0	0	0	0	0		0	0	0	0		0	0	1	0		0	1		0		0
Thyone_inermis	1	0	0	0	0		0	0	0	0		0	0	1	0		0	1		0		0
Thyone_pseudofusus	0	0	0	0	0		1	1	0	0		0	0	1	0		0	1		1		0
Thyone_sabanillaensis	0	0	0	0	0		0	0	0	0		0	0	0	1		0	0		0		0
Thyone_tanyspeira	0	0	0	0	0		0	0	0	1		0	0	0	0		0	0		0		0
Acaudina_suspecta	0	0	0	0	0		0	0	0	0		0	0	0	1		0	0		0		0
Cucumaria_pulcherrima	0	0	0	0	0		0	0	0	0		0	0	0	1		0	0		0		0
Duasmodactyla_seguroensis	0	1	0	0	1		1	0	0	0		0	0	0	0		1	0		0		0
Euthyonacta_solida	0	0	0	0	0		1	0	0	0		0	0	0	0		0	0		0		0
Leptopentacta_deichmannae	0	0	0	0	0		0	0	0	0		0	0	0	1		0	0		0		0
Ocnus_pygmaeus	0	1	0	0	0		1	0	0	0		0	0	0	0		1	1		0		0
Ocnus_surinamensis	1	1	1	0	1		0	0	0	0		0	0	1	0		1	0		1		0
Ocnus_suspectus	1	1	0	0	1		1	1	0	0		0	0	1	0		0	0		1		0
Pentacta_pygmaea	0	0	0	0	0		0	0	0	0		0	0	0	0		1	0		0		0
Thyone_cognata	0	0	0	1	0		0	0	0	0		0	0	0	0		0	0		0		0
Thyonella_gemmata	1	0	0	0	0		1	0	0	0		0	0	1	0		0	0		0		0
Thyonella_pervicax	0	0	0	0	0		1	0	0	0		0	0	1	0		0	0		0		0
Euthyonidiella_destichada	1	1	0	0	0		0	1	0	0		0	0	1	0		1	0		0		0
Euthyonidiella_trita	0	1	0	0	1		1	0	0	0		0	0	0	0		1	0		0		0
Sclerodactyla_briareus	0	0	0	0	0		0	0	0	0		0	0	0	0		1	0		0		0
Pseudothyone_belli	0	1	0	0	0		1	1	0	0		0	0	1	0		0	1		0		0
Lissothuria_antillensis	0	0	0	0	0		0	1	0	0		0	0	0	0		0	0		0		0
Lissothuria_braziliensis	0	0	0	0	0		0	0	0	0		0	0	0	1		0	0		0		0
Benthodytes_sanguinolenta	0	0	0	0	0		0	0	0	1		0	0	0	0		0	0		0		0
Benthodytes_typica	0	0	0	1	0		0	0	0	0		0	0	0	0		0	0		0		0
Astichopus_multifidus	1	1	1	0	1		1	0	0	0		0	0	1	1		1	0		0		0
Eostichopus_arnesoni	0	1	0	0	0		0	0	1	0		0	0	0	0		0	0		0		0
Isostichopus_macroparentheses	0	0	0	0	1		1	1	0	0		0	0	0	0		0	0		0		0
Isostichopus_badionotus	1	1	1	1	1		1	1	0	1		0	0	1	0		1	1		1		0
Actinopyga_agassizi	1	1	1	1	1		1	1	1	1		0	1	0	0		0	0		0		0
Holothuria_(Cystipus)_cubana	1	1	1	0	0		1	1	0	0		0	0	1	0		1	0		0		0
Holothuria_(Cystipus)_occidentalis	0	0	1	0	0		0	0	0	1		0	0	0	0		0	0		0		0
Holothuria_(Cystipus)_pseudofossor	1	1	0	0	1		1	1	0	0		0	0	0	1		1	0		0		0
Holothuria_(Halodeima)_floridana	1	1	0	0	1		1	1	0	1		0	0	1	0		0	0		1		0
Holothuria_(Halodeima)_grisea	1	1	0	1	1		1	1	0	0		0	0	1	1		1	0		1		0
Holothuria_(Halodeima)_mexicana	1	1	1	1	1		1	1	1	1		1	1	1	0		1	1		1		0
Holothuria_(Platyperona)_parvula	0	1	1	0	1		0	0	0	0		0	0	0	1		1	1		1		0
Holothuria_(Platyperona)_rowei	0	0	0	0	0		0	1	0	0		0	0	0	0		0	0		0		0
Holothuria_(Semperothuria)_densipedes	0	1	0	0	0		0	0	0	0		0	0	0	0		0	0		0		0
Holothuria_(Semperothuria)_surinamensis	1	1	0	0	1		1	1	0	0		0	0	0	0		1	1		1		0
Holothuria_(Selenkothuria)	1	1	1	1	1		0	0	0	1		0	0	1	1		0	1		1		0
Holothuria_(Theelothuria)_princeps	0	1	1	0	0		1	0	0	0		0	0	0	0		1	0		0		0
Holothuria_(Theelothuria)_imperator	0	0	0	0	0		1	0	0	0		0	0	0	0		0	0		0		0
Holothuria_(Thymiosycia)_arenicola	1	1	1	0	1		1	1	1	1		0	0	1	1		0	0		1		0
Holothuria_(Thymiosycia)_impatiens	1	1	0	0	1		1	1	0	0		0	0	1	1		1	1		1		0
Holothuria_(Thymiosycia)_thomasi	1	1	1	1	0		1	1	0	1		0	0	1	0		0	0		1		0
Molpadia_cubana	0	0	0	0	0		0	0	0	0		0	0	1	0		0	0		0		0
Molpadia_parva	0	0	0	0	0		0	0	0	0		0	0	1	1		0	0		0		0
Epitomapta_roseola	0	0	0	0	1		1	1	0	0		0	0	1	0		0	0		0		0
Euapta_lappa	1	1	1	0	1		1	1	0	0		0	1	1	0		0	1		1		0
Protankyra_ramiurna	0	1	0	0	0		0	0	0	0		0	0	0	0		0	0		0		0
Leptosynapta_imswe	0	0	0	0	0		0	1	0	0		0	0	0	0		0	0		0		0
Leptosynapta_tenuis	0	0	0	0	0		1	0	0	0		0	0	0	0		0	0		0		0
Leptosynapta_multigranula	0	0	0	0	0		1	1	0	0		0	0	0	0		0	0		0		0
Leptosynapta_nannoplax	0	0	0	0	0		0	1	0	0		0	0	0	0		0	0		0		0
Leptosynapta_parvipatina	0	0	0	0	0		0	0	0	0		0	0	1	0		0	1		0		0
Leptosynapta_roseogradia	0	0	0	0	0		0	1	0	0		0	0	0	0		0	0		0		0
Eupatinapta_acanthia	0	0	0	0	0		0	0	0	0		0	0	1	0		0	0		0		0
Synaptula_hydriformis	1	1	0	0	1		1	1	0	1		1	1	1	0		0	0		1		0
Chiridota_rotifera	1	1	1	0	1		1	1	0	0		0	0	1	0		1	1		1		0
